1 **Mitochondria-containing Extracellular Vesicles (EV) Reduce Mouse**  
2 **Brain Infarct Sizes and EV/HSP27 Protect Ischemic Brain**  
3 **Endothelial Cultures**

4 Kandarp M. Dave<sup>1</sup>, Donna B. Stolz<sup>2</sup>, Venugopal R. Venna<sup>3</sup>, Victoria A. Quaioco<sup>3</sup>,  
5 Michael E. Maniskas<sup>3</sup>, Michael John Reynolds<sup>4</sup>, Riyan Babidhan<sup>1</sup>, Duncan X.  
6 Dobbins<sup>1</sup>, Maura N. Farinelli<sup>1,5</sup>, Abigail Sullivan<sup>1,6</sup>, Tarun N. Bhatia<sup>1</sup>, Hannah  
7 Yankello<sup>7</sup>, Rohan Reddy<sup>1</sup>, Younsoo Bae<sup>8</sup>, Rehana K. Leak<sup>1</sup>, Sruti S. Shiva<sup>4,9</sup>,  
8 Louise D. McCullough<sup>3</sup>, Devika S Manickam<sup>1</sup>

9 <sup>1</sup>Graduate School of Pharmaceutical Sciences, Duquesne University, Pittsburgh, PA

10 <sup>2</sup>Center for Biologic Imaging, University of Pittsburgh Medical School, Pittsburgh, PA

11 <sup>4</sup>Department of Neurology, McGovern Medical School, University of Texas Health Science  
12 Center, Houston, TX

13 <sup>4</sup>Pittsburgh Heart Lung Blood Vascular Institute, University of Pittsburgh Medical School,  
14 Pittsburgh, PA

15 <sup>5</sup>Department of Biochemistry and Molecular Biology, Gettysburg College, Gettysburg, PA

16 <sup>6</sup>Psychological and Brain Sciences, Villanova University, Villanova, PA, USA

17 <sup>7</sup>Departments of Chemical and Biomedical Engineering, Carnegie Mellon University, Pittsburgh,  
18 PA

19 <sup>8</sup>Department of Pharmaceutical Sciences, College of Pharmacy, The University of Kentucky,  
20 Lexington, KY

21 <sup>9</sup>Department of Pharmacology & Chemical Biology, University of Pittsburgh Medical School,  
22 Pittsburgh, PA

23

24 †**Corresponding author:**

25 Devika S Manickam, Ph.D.

26 600 Forbes Avenue, 453 Mellon Hall

27 Pittsburgh, PA 15282.

28 Email: [soundaramanickd@duq.edu](mailto:soundaramanickd@duq.edu), Twitter: [@manickam\\_lab](https://twitter.com/manickam_lab)

29 Phone: +1 (412) 396-4722, Fax +1 (412) 396-2501

30 **Highlights**

- 31       ➤ Medium-to-large extracellular vesicles (m/IEVs), not small EVs contain mitochondria
- 32       ➤ m/IEVs increased ATP and mitochondrial function in brain endothelial cells (BECs)
- 33       ➤ m/IEVs from oligomycin-exposed BECs did not increase recipient BEC ATP levels
- 34       ➤ Intravenously injected m/IEVs reduced brain infarct sizes in a mouse stroke model
- 35       ➤ EV/HSP27 mixtures reduced small and large dextran molecule permeability across BECs

36

37

38

## 39 **Abstract**

40

41 Ischemic stroke causes brain endothelial cell (BEC) death and damages tight junction integrity of  
42 the blood-brain barrier (BBB). We harnessed the innate mitochondrial load of endothelial cell-  
43 derived extracellular vesicles (EVs) and utilized mixtures of EV/exogenous heat shock protein  
44 27 (HSP27) as a one-two punch strategy to increase BEC survival (via EV mitochondria) and  
45 preserve their tight junction integrity (via HSP27 effects). We demonstrated that the medium-to-  
46 large (m/IEV) but not small EVs (sEV) transferred their mitochondrial load, which subsequently  
47 colocalized with the mitochondrial network of the recipient primary human BECs. BECs treated  
48 with m/IEVs increased relative ATP levels and displayed superior mitochondrial function.  
49 **Importantly, m/IEVs isolated from oligomycin (mitochondrial complex V inhibitor) or rotenone**  
50 **(mitochondrial complex I inhibitor)-exposed BECs (RTN-m/IEVs or OGM-m/IEVs) did not**  
51 **increase BECs ATP levels compared to naïve m/IEVs. In contrast, RTN-sEV and OGM-sEV**  
52 **functionality in increasing cellular ATP levels was minimally impacted in comparison to naïve**  
53 **sEVs. Intravenously administered m/IEVs showed a reduction in brain infarct sizes compared to**  
54 **vehicle-injected mice in a mouse middle cerebral artery occlusion model of ischemic stroke. We**  
55 **formulated binary mixtures of human recombinant HSP27 protein with EVs: EV/HSP27 and**  
56 **ternary mixtures of HSP27 and EV with cationic polymer poly (ethylene glycol)-b-poly**  
57 **(diethyltriamine): (PEG-DET/HSP27)/EV. (PEG-DET/HSP27)/EV and EV/HSP27 mixtures**  
58 **decreased the paracellular permeability of small and large molecular mass fluorescent tracers in**  
59 **oxygen glucose-deprived primary human BECs. This one-two-punch approach to increase BEC**  
60 **metabolic function and tight junction integrity is a promising strategy for BBB protection and**  
61 **prevention of long-term neurological dysfunction post-ischemic stroke.**

62 **Graphical Abstract**

Mitochondria-containing medium-to-large EVs (m/IEVs) increase BEC metabolic function and EV/HSP27 mixtures protect BEC integrity

m/IEVs show neuroprotection in a mouse model of ischemic stroke

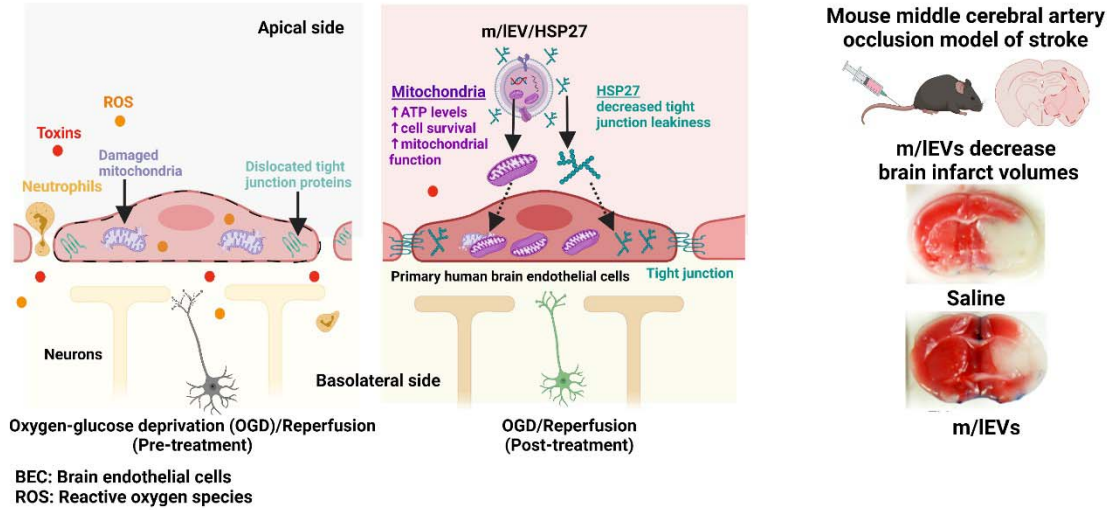

63

64

65 **Keywords**

66 extracellular vesicles, mitochondria, heat shock protein, paracellular permeability, BBB

67 protection, ischemic stroke

## 68 **Abbreviations**

|    |              |                                                           |
|----|--------------|-----------------------------------------------------------|
| 69 | BBB          | Blood-brain barrier                                       |
| 70 | BECs         | Brain endothelial cells                                   |
| 71 | Calcein AM   | Calcein acetoxymethyl                                     |
| 72 | ECAR         | Extracellular acidification rate                          |
| 73 | EVs          | Extracellular vesicles                                    |
| 74 | EXOs         | Exosomes                                                  |
| 75 | FT cycle     | Freeze/Thaw cycle                                         |
| 76 | GAPDH        | Glyceraldehyde 3-phosphate dehydrogenase                  |
| 77 | HSP27        | Heat shock protein 27                                     |
| 78 | hCMEC/D3     | human cerebral microvascular endothelial cell line        |
| 79 | HBMEC        | primary human brain microvascular endothelial cells       |
| 80 | MVs          | Microvesicles                                             |
| 81 | m/IEV        | medium-to-large EVs                                       |
| 82 | MitoT-red-EV | Mitotracker deep red-labeled extracellular vesicles       |
| 83 | OCR          | Oxygen consumption rate                                   |
| 84 | OGD          | Oxygen-glucose deprivation                                |
| 85 | OGD/RP       | Oxygen-glucose deprivation/reperfusion                    |
| 86 | PEI          | Polyethylenimine                                          |
| 87 | PEG-DET      | poly (ethylene glycol)- <i>b</i> -poly (diethyl triamine) |
| 88 | ROS          | Reactive oxygen species                                   |
| 89 | sEV          | small EVs                                                 |
| 90 | TRITC        | Tetramethyl rhodamine iso-thiocyanate                     |

## 91 **1. Introduction**

92 EVs are an emerging class of natural carriers for drug delivery due to their known roles in  
93 intercellular communication. They retain membrane signatures reminiscent of the donor cells  
94 from which they are derived, and therefore possess inherent homing capabilities to recipient cells  
95 of the same type <sup>1, 2</sup>. They are also likely to be less immunogenic compared to synthetic  
96 nanoparticles. The smaller EVs (sEVs) range from 30-200 nm in particle diameter and their  
97 biogenesis involves the inward budding of endosomal membranes that transforms into  
98 multivesicular bodies followed by their fusion with the plasma membrane and sEV release into  
99 extracellular spaces <sup>2</sup>. The biogenesis of the medium-to-larger EVs (m/IEVs) involves their  
100 outward budding from the cell's plasma membrane with particle diameters ranging from 100 –  
101 1000 nm <sup>2</sup>. The selective packaging of the functional mitochondria and mitochondrial proteins in  
102 the m/IEVs motivated us to harness the m/IEV mitochondrial load as a therapeutic modality.  
103 Mitochondria play a central role in cellular energy production and regulation of cell death  
104 including apoptosis and autophagy <sup>3</sup>. Ischemia-induced mitochondrial dysfunction in the brain  
105 endothelial cells (BECs) lining the blood-brain barrier (BBB) initiates the generation of  
106 excessive reactive oxygen species, reduction in ATP levels, and consequently BEC death <sup>3</sup>.  
107 Therefore, protection of mitochondrial function via exogenous mitochondria supplementation is  
108 a potent strategy to increase BEC survival post-ischemic stroke. Thus, we rationalize that  
109 mitochondria-containing m/IEVs derived from BECs can increase cellular bioenergetics and  
110 survival under hypoxic conditions.

111

112 Ischemic stroke-induced oxygen-glucose-deprivation (OGD) decreases ATP levels in the  
113 BECs leading to the accumulation of cellular cations and excitatory neurotransmitters <sup>4-6</sup>. The

114 cationic overload catalyzes enzymatic activities leading to generation of reactive oxygen species  
115 (ROS), impairment of mitochondrial ROS defense mechanisms, and the subsequent  
116 mitochondrial dysfunction. Therefore, restoring mitochondrial function is a viable strategy to  
117 reduce damage to the BECs. In addition, disruption of the BBB is a major hallmark of ischemic  
118 stroke that is associated with altered expression of tight junctions, adherens junction proteins,  
119 and BBB transporters <sup>4, 5, 7</sup>. Early ischemia/reperfusion activates the polymerization of the actin  
120 cytoskeleton in endothelial cells which disassembles and internalizes the tight junction proteins  
121 and consequently lead to the loss of barrier properties of the BECs lining the BBB <sup>8, 9</sup>.  
122 Uncontrolled actin polymerization-induced breakdown of BBB leads to the infiltration of  
123 proinflammatory mediators, blood cells, circulatory immune cells, and toxins into the brain  
124 parenchyma, and leads to the secondary injury cascade <sup>9, 10</sup>. Hence, a combined strategy to  
125 decrease BEC death and their paracellular permeability, ultimately leading to protection of the  
126 BBB metabolic function and tight junction integrity is a potent approach for the treatment of  
127 ischemia/reperfusion injury.

128

129 Preclinical studies have demonstrated that endothelial, but not neuronal overexpression of  
130 heat shock protein 27 (HSP27), inhibited actin polymerization and elicited long-lasting  
131 protection against stroke-induced BBB disruption and neurological deficits <sup>9, 10</sup>. HSP27 binds to  
132 actin monomer and inhibits tight junctional protein translocation in endothelial cells <sup>9, 11-14</sup>.  
133 Intravenous administration of cell-penetrating transduction domain (TAT)-HSP27 rapidly  
134 enhanced HSP27 levels in brain microvessels, decreased infarct volumes, and attenuated  
135 ischemia/reperfusion-induced BBB disruption <sup>9</sup>. **Therefore, we selected human recombinant**



136 HSP27 protein as a model therapeutic protein to determine whether EV/HSP27 mixtures may  
137 decrease tight junction permeability post-ischemia/reperfusion in culture conditions.

138

139 Administration of EV/exogenous HSP27 mixtures is a promising strategy that can allow  
140 harnessing the inherent targeting capabilities of the EVs to the recipient BECs along with the  
141 added benefits of their mitochondrial load. Here, we *hypothesize* that innate mitochondria-  
142 containing BEC-derived EVs with exogenous HSP27 protein is a one-two-punch approach to  
143 increase BEC survival and protect its tight junction barrier via decreasing the paracellular  
144 permeability post-ischemia. This approach will protect and strengthen the BBB that in turn can  
145 ameliorate long-term neurological damage and dysfunction. We tested the effects of adding a  
146 cationic copolymer, poly (ethylene glycol)-*b*-poly (diethyltriamine) (PEG-DET) to the  
147 EV/HSP27 mixtures to determine if the degree of HSP27 interactions can be further improved.  
148 We have previously used PEG-DET polymer to form nanosized mixtures with superoxide  
149 dismutase protein and demonstrated a >50% reduction in brain infarct volume in a mouse model  
150 of acute ischemic stroke <sup>15</sup>. PEG-DET is a cationic diblock copolymer known for its safety and  
151 gene transfer efficacy in comparison to commercial transfection agents such as lipofectamine,  
152 polyethyleneimine, and other cationic polymers <sup>16-18</sup>.

153

154

155 In this study, we isolated sEVs and m/IEVs from hCMEC/D3: a human brain endothelial cell  
156 line using a sequential ultracentrifugation method <sup>19</sup> and characterized their particle diameter,  
157 zeta potential, and membrane integrity post-cold storage. According to recommendations from  
158 the 2018 Minimal Information for Studies of Extracellular Vesicles <sup>20</sup>, EVs with an average

159 particle diameter <200 nm should be referred to as small EVs (sEVs), and >200 nm as medium-  
160 to-large EVs (m/IEVs). In our studies, the average particle diameter of EVs that pelleted down at  
161 120,000  $\times g$  was about 122 nm, whereas the average diameter of EVs isolated at 20,000  $\times g$  was  
162 about 185 nm. Therefore, we refer to EVs isolated at 120,000  $\times g$  as sEVs, and EVs isolated at  
163 20,000  $\times g$  as m/IEVs. A mixture of sEV and m/IEVs at a 1:1 weight: weight ratio is referred to  
164 as EVs. While we collectively refer to both large (m/IEV) and small (sEV) vesicle fractions as  
165 EVs, we have studied the singular effects of both m/IEVs and sEVs. We showed the presence of  
166 mitochondrial components in m/IEVs using transmission electron microscopy and western  
167 blotting. We evaluated the effects of EV dose and incubation times on their uptake to the  
168 recipient BECs and demonstrated the colocalization of m/IEV-delivered mitochondria with the  
169 mitochondrial network of the recipient BECs. We studied the effects of EV exposure on the  
170 resulting relative ATP levels, mitochondrial respiration, and glycolytic capacity of the recipient  
171 BECs. [We conducted a pilot experiment in a mouse middle cerebral artery occlusion model of](#)  
172 [stroke to determine its potential therapeutic effects and to determine if m/IEV treatment is safe](#)  
173 [from any adverse effects when administered intravenously \(i.v.\) to the mice. Twenty-four hours](#)  
174 [post-injection, we analyzed the brain infarct sizes of mice treated with m/IEVs or saline to](#)  
175 [determine its therapeutic effects.](#) The physicochemical characteristics of EV/HSP27 binary  
176 mixtures and (PEG-DET/HSP27)/EV ternary mixtures were studied using native polyacrylamide  
177 gel electrophoresis and dynamic light scattering. The effects of EV/HSP27 on the paracellular  
178 permeability of small and large molecule fluorescent tracers were evaluated under ischemic and  
179 ischemia/reperfusion conditions in primary human BECs.

180

## 181 **2. Materials**

182 Recombinant human HSP27 was purchased from Novus Biologicals (Centennial, CO). Cell  
183 Titer Glo 2.0 reagent (ATP assay) was procured from Promega (Madison, WI). Micro BCA and  
184 Pierce BCA protein assay kits were purchased from Thermo Scientific (Rockford, IL). PEG-DET  
185 polymer was synthesized by aminolysis of PEG-poly( $\beta$ -benzyl L-aspartate) block copolymers  
186 with diethyltriamine as previously reported<sup>16, 18, 21, 22</sup>. Bio-Safe Coomassie G-250 stain was  
187 purchased from Bio-Rad Laboratories Inc. (Hercules, CA). Collagen Type I was purchased from  
188 Corning (Discovery Labware Inc, Bedford, MA) and endothelial cell basal medium-2 (EBM-2)  
189 was procured from Lonza (Walkersville, MD). Hydrocortisone, human basic fibroblast growth  
190 factor, ascorbic acid, and rotenone and [oligomycin A](#) were purchased from Sigma-Aldrich (Saint  
191 Louis, MO). The penicillin-Streptomycin solution, Chemically Defined Lipid Concentrate, and  
192 calcein-AM were procured from Invitrogen (Carlsbad, CA). Polycarbonate centrifuge tubes were  
193 purchased from Beckman Coulter, Inc. (Brea, CA). The electrophoresis sample buffer was  
194 purchased from Bio-Rad (Hercules, CA). PET track-etched membrane Falcon Cell Culture  
195 inserts of 0.4  $\mu$ m pore size were procured from Corning (Discovery Labware Inc, Bedford, MA).  
196 TRITC 65-85 kD and 4.4 kD dextran was procured from Sigma (St. Louis, MO). A low-volume  
197 disposable cuvette (Part no. ZEN0040, Malvern) was used for particle size measurements.  
198 CellLight Mitochondria-GFP Backman 2.0 reagent, MitoTracker Green FM, and MitoTracker  
199 Deep Red FM, Dynabeads Protein G (cat#10003D), and DynaMag-2 magnetic stand  
200 (cat#12321D) were procured from Invitrogen (Eugene, OR). Mouse monoclonal antibodies  
201 against ATP5A (cat#ab14748), GAPDH (cat#ab8245), HSP27 (cat#ab2790) were purchased  
202 from Abcam. Mouse monoclonal antibody against CD9 (cat#ab92726) was received from Life  
203 Technologies Corporation (Eugene, OR), whereas Alexa Fluor 790-conjugated donkey anti-  
204 mouse IgG was received from Jackson ImmunoResearch Lab Inc (West Grove, PA).

205

## 206 **2.1. Cell models**

207 A human cerebral microvascular endothelial cell line (hCMEC/D3, cat#102114.3C) was  
208 received from Cedarlane Laboratories (Burlington, Ontario) at passage number (P) 25, and cells  
209 between P25 and P35 were used in all experiments<sup>19, 23</sup>. hCMEC/D3 cells were grown in tissue  
210 culture flasks, multiwell plates, or transwell inserts precoated using 0.15 mg/mL rat collagen I in  
211 a humidified 5% CO<sub>2</sub> incubator at 37 ± 0.5°C (Isotemp, Thermo Fisher Scientific). The cells  
212 were cultured in complete growth medium composed of endothelial cell basal medium (EBM-2)  
213 supplemented with fetal bovine serum (5% FBS), penicillin (100 units/mL)-streptomycin (100  
214 µg/mL) mixture, hydrocortisone (1.4 µM), ascorbic acid (5 µg/mL), Chemically Defined Lipid  
215 Concentrate (0.01%), 10 mM HEPES (pH 7.4), and bFGF (1 ng/mL). The complete growth  
216 medium was replenished every other day until the cells formed confluent monolayers. Prior to  
217 passage, the cells were washed using 1x phosphate buffer saline (PBS) and detached from the  
218 flask using 1x TrypLE Express Enzyme (Gibco, Denmark). We received primary human brain  
219 microvascular endothelial cells (HBMEC, catalog no. ACBRI 376) from Cell Systems  
220 (Manassas, VA) at P3, and cells below P11 were used in all experiments. HBMECs maintained  
221 in Cell Systems Classic Culture Medium containing 1% culture boost were cultured in tissue  
222 culture flasks, multiwell plates, or transwell inserts pre-treated with attachment factors. The  
223 complete growth medium was replenished every day until the cells formed confluent  
224 monolayers. For passage, HBMEC monolayers were washed with Passage Reagent Group 1  
225 (PRG 1, dPBS/EDTA solution), detached with PRG 2 (dPBS/trypsin-EDTA solution) and PRG 3  
226 (trypsin inhibitor solution).

227

## 228 **2.2. Isolation of sEVs and m/IEVs from hCMEC/D3 cells**

229 It should be noted that while we collectively refer to both large (m/IEVs) and small (sEVs)  
230 vesicle fractions as EVs, we study both m/IEVs and sEVs. Wherever noted, a 1:1 w/w mixture of  
231 sEVs and m/IEVs is collectively referred to as EVs. sEVs and m/IEVs were isolated from  
232 conditioned medium supernatants of hCMEC/D3 cells using the differential ultracentrifugation  
233 method <sup>19</sup>. We used three tissue culture flasks with a surface area of 175 cm<sup>2</sup> for culturing the  
234 hCMEC/D3 BECs for EV isolation. The average total number of cells in each flask was about  
235 16-19×10<sup>6</sup> cells. Tissue culture flasks with a 175 cm<sup>2</sup> growth area (T175) containing confluent  
236 hCMEC/D3 were washed with pre-warmed 1x PBS pH 7.4 (0.0067 M, PO<sub>4</sub>) without calcium  
237 and magnesium (catalog#SH30256.01, HyClone Lab, S Logan, Utah), and incubated with serum-  
238 free medium for 48 h in a humidified 5% CO<sub>2</sub> incubator at 37 ± 0.5°C. Post-incubation, the EV-  
239 conditioned medium was collected in polypropylene centrifuge tubes and centrifuged at 2000 ×g  
240 for 22 min at 4°C to pellet down apoptotic bodies and cell debris using a Sorvall ST 8R  
241 centrifuge (ThermoFisher Scientific, Osterode am Harz, Germany). The supernatant was  
242 transferred into polycarbonate tubes and centrifuged at 20,000 ×g for 45 min at 4°C to pellet  
243 down m/IEVs using an Optima XE-90 ultracentrifuge equipped with a 50.2 Ti rotor (Beckman  
244 Coulter, Indianapolis, IN). Next, the supernatant was filtered through a 0.22 μm PES membrane  
245 syringe filter, and the flow-through was centrifuged at 120,000 ×g for 70 min at 4°C to collect  
246 sEVs. Lastly, m/IEVs and sEVs pellets were washed once with 1x PBS and suspended in 1x PBS  
247 for particle diameter measurements and *in vitro* experiments or 10 mM HEPES buffer pH 7.4 for  
248 zeta potential measurements. sEVs and m/IEVs samples were stored at -20°C until further use.  
249 The total protein content in sEVs and m/IEVs was quantified using Pierce MicroBCA assay.

250

251 For isolation of mitochondria-depleted EVs, confluent hCMEC/D3 BECs were treated with 1  
252  $\mu$ M rotenone (mitochondrial complex I inhibitor) or oligomycin A (electron transport chain  
253 complex V inhibitor) in complete culture medium for 4 h. Post-treatment, the treatment mixture  
254 was replaced with serum-free culture medium and incubated in a humidified incubator at 37°C  
255 for 48 h. We isolated sEVs and m/IEVs from the conditioned medium of hCMEC/D3 BECs  
256 using a differential ultracentrifugation method. EVs isolated post rotenone (RTN) and  
257 oligomycin A (OGM)-treatment were referred to as RTN-sEVs, RTN-m/IEVs and OGM-sEVs,  
258 OGM-m/IEVs, respectively.

259

### 260 **2.3. Dynamic light scattering (DLS)**

261 The stability of naïve EVs under storage conditions was determined by their measuring  
262 particle diameter and zeta potential using dynamic light scattering. EV samples at 0.5 mg  
263 protein/mL in 1x PBS were frozen at -20°C for 24 h and thawed at room temperature for 30 min.  
264 Post-thawing, the particle diameters, and dispersity indices were measured using Malvern  
265 Zetasizer Pro (Worcestershire, UK). The freeze-thaw cycle was repeated three times and all  
266 samples were run in triplicate. Average particle diameter, dispersity index, and zeta potential  
267 values were reported as mean  $\pm$  standard deviation.

268

### 269 **2.4. Membrane integrity of EVs after isolation and upon storage conditions**

270 The membrane integrity of sEV and m/IEV post-isolation and upon revival after their storage  
271 conditions (described earlier in the DLS section) was determined using a calcein AM flow  
272 cytometry assay. First, polystyrene sub-micron-sized beads ranging from 0.2 to 2  $\mu$ m particle  
273 diameters were used to calibrate the Attune NxT flow cytometer. The calibration beads, sEV,

274 and m/IEV samples were tested and events captured in forward scatter (FSC) and side scatter  
275 (SSC) plots were analyzed using a small particle side scatter 488/10-nm filter (BL1) channel.  
276 sEVs and m/IEVs were diluted to 20  $\mu\text{g}$  protein/mL in PBS and incubated/stained with 10  $\mu\text{M}$   
277 calcein AM for 20 min at room temperature in the dark. Unstained sEVs and m/IEVs were used  
278 to gate the background signals, whereas samples treated with 2% v/v Triton X-100 followed by  
279 staining with calcein AM were used as controls to determine if calcein-positive signals were  
280 specifically associated with intact EVs. For each sample analysis, an aliquot of 100  $\mu\text{L}$  was run  
281 through Attune NxT Acoustic cytometer (Invitrogen, Singapore) and 50,000 events were  
282 recorded during the run. The calcein-associated fluorescence intensity was detected at 488/10 nm  
283 and percentage signal intensities were presented in histogram plots generated using Attune  
284 software. Calcein AM-associated background signals were gated using the controls such as PBS  
285 containing 10  $\mu\text{M}$  calcein AM and PBS/2% Triton X-100/calcein AM mixture.

286

## 287 **2.5. Transmission Electron Microscopy (TEM) analysis of EVs**

288 *Negative-stain images of EVs:* Suspensions (150  $\mu$ L) of EVs were pelleted at 100,000  $\times$ g  
289 in a Beckman Airfuge for 45 min, the supernatant was carefully removed, and the pellets gently  
290 resuspended in 30  $\mu$ L of PBS. Formvar coated, 100 mesh grids were floated onto 10  $\mu$ L of this  
291 suspension and allowed to incubate for 5 min. The solution was wicked away with Whatman  
292 filter paper and stained with 0.45 mM filtered, 1% uranyl acetate, immediately wicked away with  
293 the filter paper. EV images were then imaged on a JEM-1400 Flash transmission electron  
294 microscope (JEOL, Peabody, 268 MA, USA) fitted with a bottom mount AMT digital camera  
295 (Danvers, MA, USA)<sup>24</sup>.

296 *TEM of cross-sectioned EVs:* Suspensions of EVs were pelleted at 100,000  $\times$ g in a  
297 Beckman airfuge for 20 min and the pellets were fixed in 2.5% glutaraldehyde in PBS overnight.  
298 The supernatant was removed and the cell pellets were washed 3x in PBS and post-fixed in 1%  
299 OsO<sub>4</sub>, 1% K<sub>3</sub>Fe(CN)<sub>6</sub> for 1 hour. Following 3 additional PBS washes, the pellet was dehydrated  
300 through a graded series of 30-100% ethanol. After several changes of 100% resin over 24 hours,  
301 the pellet was embedded in a final change of resin, cured at 37 °C overnight, followed by  
302 additional hardening at 65°C for two more days. Ultrathin (70 nm) sections were collected on  
303 200 mesh copper grids, stained with 2% uranyl acetate in 50% methanol for 10 minutes,  
304 followed by 1% lead citrate for 7 min. Sections were imaged using a JEOL JEM 1400 Plus  
305 transmission electron microscope (Peabody, MA) at 80 kV fitted with a side mount AMT 2k  
306 digital camera (Advanced Microscopy Techniques, Danvers, MA).

307

## 308 **2.6. Western blot analysis of EV protein markers**

309 The characteristic EV protein markers were evaluated using sodium dodecyl sulfate-  
310 polyacrylamide gel electrophoresis (SDS-PAGE) western blot analysis<sup>19</sup>. Briefly, fifty  $\mu$ g EV



311 protein lysates and hCMEC/D3 cell lysate were mixed with laemmli sample buffer and incubated  
312 at 95 °C for 5 min. The samples and premixed molecular weight markers (ladder) were separated  
313 on a 4-10% SDS-polyacrylamide gel at 120 V for two hours using a PowerPac Basic setup  
314 (BioRad Laboratories Inc.). The proteins were transferred onto a 0.45 µm nitrocellulose  
315 membrane at 75 V for 90 min using a transfer assembly (BioRad Laboratories Inc.). The  
316 membrane was washed with 0.1% tween-20-containing tris buffer saline (T-TBS) and blocked  
317 with Intercept blocking solution (Intercept blocking buffer:T-TBS:: 1:1) for an hour at room  
318 temperature. The membrane was incubated with [rabbit anti-calnexin \(1 µg/mL\)](#), [rabbit anti-](#)  
319 [CD63 \(1/1000 dilution\)](#), mouse anti-CD9 (0.2 µg/mL), mouse anti-ATP5A (1 µg/mL), rabbit  
320 anti-TOMM20 (1 µg/mL), and mouse anti-GAPDH (1 µg/mL) primary antibodies in blocking  
321 solution for overnight at 4 °C. The membrane was washed with T-TBS and incubated with anti-  
322 mouse AF790 (0.05 µg/mL), and anti-rabbit AF790 (0.05 µg/mL) secondary antibodies in a  
323 blocking solution for an hour at room temperature. The membrane was washed and scanned  
324 under 800 and 700-nm near-infrared channels using an Odyssey imager (LI-COR Inc., Lincoln,  
325 NE) at intensity setting 5.

326

## 327 **2.7. Uptake of Mitotracker-labeled EVs into HBMECs using flow cytometry**

### 328 **2.7.1. Isolation of mitochondria-labeled EVs**

329 hCMEC/D3 cells (P32) were cultured in a T175 flask to confluency. The complete growth  
330 medium was removed, cells were washed with 1x PBS, and cells were incubated with 100 nM  
331 Mitotracker deep red (MitoT-red) diluted in a conditioned medium for 30 min in a humidified  
332 incubator. Next, the medium was replaced with serum-free medium after washing the cells with  
333 1x PBS, and cells were kept in a humidified incubator for 24 h. Post-incubation, the conditioned

334 medium was collected into centrifuge tubes. sEV (MitoT-red-sEV) and m/IEV (MitoT-red-  
335 m/IEV) from Mitotracker Red-labeled cells were isolated from the conditioned medium using the  
336 differential centrifugation method described in section 2.2. The EV protein content in MitoT-red-  
337 sEV and MitoT-red-m/IEV was determined using MicroBCA assay and the samples were stored  
338 at  $-20\text{ }^{\circ}\text{C}$  until further use.

339

### 340 **2.7.2. Quantification of MitoT-EV uptake into recipient hCMEC/D3 cells using flow** 341 **cytometry**

342 hCMEC/D3 cells were cultured in 48-well plates at 50,000 cells/well in a complete growth  
343 medium. Unstained and untreated cells were used as a control, whereas cells stained with 100  
344 nM of Mitotracker deep red (MitoT-red) for 45 min in a complete growth medium were used as a  
345 positive control. The cells were treated with MitoT-red-sEV and MitoT-red-m/IEV at 30, 75, and  
346  $150\text{ }\mu\text{g}$  EV protein/well in a complete growth medium for 72 h in a humidified incubator. The  
347 cells were also treated with unlabeled sEV and m/IEV at  $150\text{ }\mu\text{g}$  EV protein/well in a complete  
348 growth medium for 72 h. Post-treatment, the cells were washed with 1x PBS, dissociated using  
349 TrypLE Express, diluted with PBS, and collected into centrifuge tubes. For each sample, an  
350 aliquot of a  $100\text{ }\mu\text{L}$  cell suspension was analyzed through Attune NxT Flow cytometer and  
351 10,000 events were recorded in FSC vs. SSC plots. The Mitotracker deep red fluorescence  
352 intensity was detected at 670/14 nm and percentage signal intensities were presented in  
353 histogram plots generated using Attune software version 3.2.3. Mitotracker deep red background  
354 signals were gated using the controls, including PBS and untreated cells.

355

356 **2.8. Uptake of MitoT-EVs into primary human brain endothelial cells using fluorescence**  
357 **microscopy**

358 **2.8.1. Uptake of MitoT-EVs into primary HBMEC monolayers**

359 MitoT-red sEV and MitoT-red-m/IEV were isolated from the conditioned medium of  
360 hCMEC/D3 cells as described in section 2.6.1. Primary HBMEC (P6) were cultured in 96-well  
361 plates at 16,500 cells/well in a complete growth medium. Post-confluency, the cells were treated  
362 with MitoT-red-sEV and MitoT-red-m/IEV at 10, 25, and 50  $\mu\text{g}$  EV protein/well in a complete  
363 growth medium for 24, 48, and 72 h in a humidified incubator. At each time-point, the cells were  
364 observed under an Olympus IX 73 epifluorescent inverted microscope (Olympus, Pittsburgh,  
365 PA) using the Cyanine-5 (Cy5, excitation 651 nm, and emission 670 nm) and bright-field  
366 channels at 20x magnification. Images were acquired using CellSens Dimension software  
367 (Olympus, USA).

368

369 **2.8.2. Colocalization of MitoT-EVs with the mitochondrial network in the recipient**  
370 **hCMEC/D3 and HBMEC monolayers**

371 **2.8.2.1. Mitotracker green staining of recipient cell mitochondria**

372 HBMEC and hCMEC/D3 cells were seeded in a 96 well-plate at 16,500 cells/well and  
373 incubated in a humidified incubator at 37°C. Post-confluency, the complete growth medium was  
374 removed, cells were washed with 1x PBS, and cells were incubated with 100  $\mu\text{M}$  of Mitotracker  
375 green in a complete medium for 30 min. Post-treatment, the medium was replaced, washed with  
376 PBS, and incubated with MitoT-red-sEV or MitoT-red-m/IEV at 50  $\mu\text{g}$  EV protein/well in a  
377 complete growth medium for 72 h in a humidified incubator. hCMEC/D3 cells stained with only  
378 Mitotracker green were used as a control. Post-incubation, the medium was removed, and cells

379 were washed and incubated with phenol-red free and serum-containing DMEM-high glucose  
380 medium. The cells were then observed under an Olympus IX 73 epifluorescent inverted  
381 microscope (Olympus, Pittsburgh, PA) using Cyanine-5 channel (Cy5, excitation 651 nm, and  
382 emission 670 nm) to detect MitoT-red-EV uptake and GFP channel to detect Mitotracker Green  
383 signals at 20x magnification and images were acquired using CellSens Dimension software  
384 (Olympus, USA). Pearson's correlation coefficient was obtained from the overlay images of Cy5  
385 and GFP channels at constant signal intensities for both channels using the Cell Insight CX7  
386 HCS microscope (ThermoFisher Scientific).

387

#### 388 **2.8.2.2. Staining of a mitochondrial matrix protein in the recipient cells using CellLight** 389 **Mitochondria-GFP BacMam reagent**

390 We used CellLight Mitochondria-GFP BacMam to label a structural mitochondrial matrix  
391 protein <sup>25</sup>. HBMECs were seeded in a 96 well-plate at 16,500 cells/well and incubated in a  
392 humidified incubator at 37°C. Post-confluency, the complete growth medium was removed, cells  
393 were washed with 1x PBS, and cells were incubated with CellLight Mitochondria-GFP reagent  
394 (at a dilution of 2 µL/10,000 cells as recommended by the manufacturer) for 16 h. Post-  
395 transduction, the medium was removed and cells were washed with 1x PBS. Next, the cells were  
396 incubated with MitoT-red-sEV and MitoT-red-m/IEV at 50 µg EV protein/well in a complete  
397 growth medium for 72 h in a humidified incubator. HBMECs transduced with only CellLight  
398 Mitochondria-GFP were used as a control. Post-incubation at 24 and 72 h, the medium was  
399 removed, and cells were washed and incubated with phenol-red free and serum-containing  
400 DMEM-high glucose medium. The cells were then observed under Olympus IX 73  
401 epifluorescent inverted microscope (Olympus, Pittsburgh, PA) using Cyanine-5 channel (Cy5,

402 excitation 651 nm, and emission 670 nm) to detect MitoT-EV uptake and GFP channel for  
403 CellLight Mitochondria-GFP signals at 20x magnification and images were acquired using  
404 CellSens Dimension software (Olympus, USA).

405

## 406 **2.9. Effects of naïve EVs on the relative ATP levels in primary HBMECs under normoxic** 407 **and ischemic/oxygen-glucose deprivation (OGD) conditions**

408 To simulate ischemic conditions *in vitro*, HBMECs were exposed to different OGD settings,  
409 and the resulting cell viability was evaluated using an ATP assay <sup>19, 26, 27</sup>. HBMECs were  
410 cultured in 96-well plates at 16,500 cells/well. Confluent HBMECs were incubated with OGD  
411 medium defined as follows: 120 mM NaCl, 5.4 mM KCl, 1.8 mM CaCl<sub>2</sub>, 0.8 mM MgCl<sub>2</sub>, 25  
412 mM Tris-HCl, pH 7.4 for 0.5 to 24 h in either normoxic or hypoxic conditions <sup>28</sup>. For normoxic  
413 conditions, the culture plates were incubated in a humidified incubator with 95% air and 5%  
414 carbon dioxide whereas for hypoxic conditions, the culture plates were incubated in an OGD  
415 chamber (Billups Rothenberg, Del Mar, CA) pre-flushed with 5% carbon dioxide, 5% hydrogen  
416 and 90% nitrogen at 37±0.5°C. For normoxic conditions, the medium was removed and the  
417 recipient HBMEC monolayers were incubated with hCMEC/D3-derived sEV, m/IEV, and  
418 sEV+m/IEV at doses of 10, 25, and 50 µg EV protein/well in a humidified incubator for 24, 48,  
419 and 72 h. For hypoxic conditions, the medium was removed and the recipient HBMEC  
420 monolayers were incubated with hCMEC/D3-derived sEV, m/IEV, and sEV+m/IEV at doses of  
421 10, 25, and 50 µg EV protein/well in the OGD medium and a humidified incubator for 24 h. [To](#)  
422 [evaluate the effect of EVs isolated from mitochondria complex I-inhibited cells on HBMEC ATP](#)  
423 [levels, confluent HBMECs were incubated with naïve sEVs, m/IEVs, RTN-sEVs, RTN-m/IEVs,](#)  
424 [OGM-sEVs or OGM-m/IEVs at 25 µg EV protein/well under OGD conditions. Normoxic](#)

425 HBMECs treated with complete culture medium and cells treated with OGD medium (OGD  
426 untreated cells) were used as controls.

427

428 Post-treatment, the treatment mixtures were replaced with pre-warmed complete growth  
429 medium, and an equal quantity of Cell Titer Glo 2.0 reagent was added. The plates were  
430 incubated for 15 min at RT on an orbital shaker in the dark and relative luminescence units were  
431 measured at 1 s integration time using a Synergy HTX multimode plate reader (BioTek  
432 Instruments Inc., Winooski, VT).

433

#### 434 **2.10. Measurement of mitochondrial function using Seahorse Analysis**

435 The oxidative phosphorylation and glycolytic functions of hCMEC/D3 cells treated with EVs  
436 during normoxic conditions were evaluated using the Seahorse analysis by measuring oxygen  
437 consumption rate (OCR) and Extracellular Acidification rate (ECAR)<sup>23, 29</sup>. hCMEC/D3 cells  
438 seeded at 20,000 cells/well were cultured in a Seahorse XF96 plate for four days. The cells were  
439 incubated with hCMEC/D3-derived sEV, m/IEV, and sEV+m/IEV for 24, 48, and 72h at 3.4 µg  
440 EV protein/well equivalent to 30 µg EV protein/cm<sup>2</sup> in complete growth medium. Post-  
441 incubation, the medium was replaced with pre-warmed DMEM and subjected to Seahorse  
442 analysis<sup>23</sup>. After measurement of baseline OCR, 2.5 µmol/L oligomycin A and 0.7 µmol/L  
443 carbonyl cyanide-p-trifluoromethoxyphenyl-hydrazone were consecutively added to measure the  
444 proton leak and maximal OCR, respectively<sup>29</sup>. The total protein of the cells in each well was  
445 measured using Pierce BCA assay.

446

#### 447 **2.11. *In vivo* studies**

448 **Mice**

449  
450 Young male C57BL/6 mice (8-12 weeks) were purchased from Jackson laboratories. Mice were  
451 acclimated in our animal facilities for one week before use. Mice were housed 4-5 per cage, with  
452 a 12-h light/dark schedule in a temperature and humidity-controlled vivarium, with ad-libitum  
453 access to a pelleted rodent diet (irradiated LabDiet 5053, PicoLab® rodent diet 20) and filtered  
454 water. All experiments were approved by the Institutional Animal Care and Use Committee at  
455 the University of Texas Health Science Center in Houston. This study was performed in  
456 accordance with the guidelines provided by the National Institute of Health (NIH) and followed  
457 RIGOR guidelines. Only male animals were used in this study to allow comparability to earlier  
458 studies and to exclude potential sex and estrogen-related effects. Animals were randomly  
459 assigned to treatment groups.

460  
461 **Mouse middle cerebral artery occlusion stroke model**

462  
463 Focal transient cerebral ischemia was induced in mice by right middle cerebral artery occlusion  
464 (MCAO) followed by reperfusion as described previously<sup>30, 31</sup>. Briefly, mice were initially  
465 anesthetized by being placed in a chamber with 4% isoflurane, and adequate sedation was  
466 confirmed by tail pinch for all surgical procedures. Surgery was performed under 1-2%  
467 continuous isoflurane. A 90-minute middle cerebral artery occlusion was achieved by blocking  
468 blood flow to MCA using a silicone-coated filament, via the external carotid artery. At the end of  
469 ischemia (90 minutes MCAO), mice were briefly re-anesthetized, and reperfusion was initiated  
470 by filament withdrawal. Body temperature was maintained by placing the mouse on a heating  
471 pad at ~37°C during a surgical procedure. Two-hours after the onset of the stroke, mice were  
472 randomly assigned to receive 200 µL of m/IEVs/vehicle treatment by intravenous injection. Mice  
473 were euthanized 24 h after the stroke and brains were analyzed for infarct size using 2,3,5-

474 triphenyl tetrazolium chloride (TTC) stained sections. Infarct analysis was performed by an  
475 investigator blinded to treatment groups.

476

## 477 **2.12. Formulation of HSP27 mixtures with EVs, PEG-DET, and EV-PEG-DET**

478 PEG-DET/HSP27 mixtures were prepared using a rapid mixing method. A PEG-DET  
479 polymer solution prepared in 10 mM HEPES buffer, pH 7.4 was mixed with 2  $\mu$ g HSP27 at  
480 PEG-DET/HSP27 w/w ratio 0.05, 0.2, 1, 5, 10, and 20:1 for 30 s. The mixture was incubated at  
481 room temperature (RT) for 30 min. For the preparation of sEV/HSP27 and m/IEV/HSP27  
482 mixtures, hCMEC/D3-derived EVs were suspended in 1x PBS were incubated with 2  $\mu$ g HSP27  
483 at EV protein/HSP27 w/w ratios 5, 10, and 15:1 in centrifuge tubes. The mixture was vortexed  
484 for 30 s and incubated at room temperature for 30 min. To prepare (PEG-DET/HSP27)/EV  
485 ternary mixtures, PEG-DET/HSP27 mixtures were prepared at 20:1 and 30:1 w/w ratios  
486 followed by incubation with 10  $\mu$ g EV protein for 30 min at RT. The different mixtures were  
487 characterized by electrophoretic mobility, particle diameter, and zeta potential.

488

## 489 **2.13. Native polyacrylamide gel electrophoresis (PAGE)**

490 The mixtures of HSP27 with PEG-DET, sEV, and m/IEV were confirmed using native  
491 PAGE. A polyacrylamide gel consisting of 4% and 10% of acrylamide in the stacking and  
492 resolving sections, respectively, was prepared using a gel casting assembly (Bio-Rad  
493 Laboratories Inc., Hercules, CA) <sup>19, 26</sup>. Native HSP27, PEG-DET/HSP27, and EV/HSP27  
494 mixtures containing 2  $\mu$ g of HSP27 at the indicated w/w ratios were mixed with native sample  
495 buffer (cat#1610738, Bio-Rad Laboratories Inc., Hercules, CA) and loaded into the gel lanes.  
496 Free PEG-DET polymer, naïve sEV, and m/IEV equivalent to indicated w/w ratios were used as



497 controls. In an independent experiment, PEG-DET/HSP27 at w/w 20:1 and 30:1 was incubated  
498 with sEV, m/IEV, and EVs (sEV: m/IEV 1:1) at PEG-DET to EV protein 2:1 and 3:1 w/w ratios.  
499 The gel was run in 1x Tris-Glycine buffer, pH 8.3 at 100 V for 2 h at 2-8 °C using PowerPac  
500 Basic setup (Bio-Rad Laboratories Inc., Hercules, CA). Post-electrophoresis, the gel was washed  
501 with deionized water for 30 min and stained with 50 mL of Biosafe Coomassie blue G-250 for 1  
502 h on an orbital shaker at room temperature. The gel was washed with deionized water for 30 min  
503 and scanned under an Odyssey imager (LI-COR Inc., Lincoln, NE) at an 800 nm channel and  
504 intensity setting 5. The band densities were quantified using ImageStudio 5.2 software.

505

#### 506 **2.14. Dynamic light scattering analysis of HSP27 mixtures**

507 The average particle diameters, dispersity indices, and zeta potentials of the HSP27 mixtures  
508 were analyzed using a Malvern Zetasizer Pro (Worcestershire, UK). hCMEC/D3 cell line-  
509 derived naïve EVs at 0.5 mg EV protein/mL were diluted in either 1x PBS for size and dispersity  
510 index or 10 mM HEPES buffer pH 7.4 for zeta potential measurements. In addition, particle sizes  
511 and dispersity indices of native HSP27 protein at 20 µg/mL, PEG-DET/HSP27 mixtures at 10,  
512 20, and 30:1 w/w ratios, sEV/HSP27 and m/IEV/HSP27 mixtures at 10:1 w/w ratio were  
513 measured in a low-volume disposable cuvette. Free PEG-DET equivalent to 10, 20, and 30:1  
514 w/w ratios and naïve EVs equivalent to 10:1 w/w ratio were also analyzed. For the zeta potential  
515 of the above mixtures, a 50 µL sample of mixtures was further diluted in a zeta cuvette  
516 containing 10 mM HEPES buffer at pH 7.4. The samples were run in triplicate. Data are  
517 presented as average particle diameter ± standard deviation. The reported data are representative  
518 of 3 independent experiments.

519

520 **2.15. Cytocompatibility of HSP27 mixtures with primary HBMEC and hCMEC/D3**  
521 **monolayers**

522 The cell viability of hCMEC/D3 and primary HBMEC monolayers treated with HSP27  
523 mixtures was measured using Cell Titer Glo (ATP) assay. hCMEC/D3 and HBMEC were seeded  
524 at 16,500 cells/well in a 96 well-plate and cultured in a humidified incubator at 37±0.5°C. The  
525 growth medium was replaced with treatment mixtures containing either native HSP27,  
526 sEV/HSP27 (10:1), m/IEV/HSP27 (10:1), sEV+m/IEV at 1:1/HSP27 (10:1), or PEG-  
527 DET/HSP27 (20:1) at a dose of 2 µg HSP27 protein per well. Naïve sEV, m/IEV, equivalent  
528 amounts of sEV+m/IEV, and free PEG-DET equivalent to 20:1 in complete medium were used  
529 as controls. Polyethyleneimine (PEI) at 50 and 100 µg/mL in a complete growth medium was  
530 used as a positive control. The mixtures and controls were treated for 72 h in a humidified  
531 incubator at 37±0.5°C. Post-incubation, the ATP assay was performed using Cell Titer Glo 2.0  
532 reagent as described earlier in section 2.8. The cell viability of HSP27 mixtures treated HBMECs  
533 was calculated using Equation 1.

534 
$$\text{Cell viability (\%)} = \frac{\text{Relative light units (RLU) of treated cells}}{\text{RLU of untreated cells}} \times 100 \quad (\text{Equation 1})$$

535  
536 **2.16. Paracellular permeability of TRITC-labeled 4.4 and 65-85 kD Dextran in HBMEC**  
537 **monolayers pretreated with EV/HSP27, PEG-DET/HSP27 binary mixtures and PEG-**  
538 **DET/EV/HSP27 ternary mixtures**

539 **2.16.1 Hypoxic conditions (OGD only)**

540 Primary HBMEC (P4-P9) in a complete growth medium were seeded at 50,000 cells/cm<sup>2</sup> in a  
541 24-well format cell culture insert (insert area: 0.33 cm<sup>2</sup>) for four days to form a complete  
542 endothelial monolayer. The medium was replaced every 48 h during this culturing period. The

543 abluminal wells were filled with complete growth medium throughout the culturing period. The  
544 complete growth medium was replaced with 300  $\mu$ L of growth medium containing 2  $\mu$ g  
545 HSP27/well (formulated as described in 2.10) for 72 h. Post-treatment, the complete growth  
546 medium was replaced with 300  $\mu$ L of OGD medium containing 1  $\mu$ M TRITC-Dextran. The  
547 OGD medium containing 1 $\mu$ M TRITC-Dextran alone was used as a control. The abluminal  
548 chamber was filled with 0.5 mL of fresh complete growth medium. The untreated group was  
549 incubated in a humidified incubator whereas OGD treatment groups were incubated in an OGD  
550 chamber (as described earlier in section 2.8.). The concentration of TRITC-Dextran in the  
551 abluminal medium was measured at 4, and 24 h post-treatment. A 50  $\mu$ L aliquot was collected at  
552 indicated time points from the abluminal side. An equal volume of fresh medium was replaced to  
553 maintain the sink conditions. The concentration of TRITC-Dextran was measured using Synergy  
554 HTX multimode plate reader at excitation 485/20 and emission 580/50 nm. The relative diffusion  
555 was calculated using **equation 2** shown below in **2.16.2**.

556

### 557 **2.16.2. OGD/reperfusion**

558 Post-24 h of OGD exposure, HBMECs in the culture inserts were washed with 1x PBS.  
559 HBMECs were incubated with a complete growth medium containing 1  $\mu$ M 65-85 or 4.4 kD  
560 TRITC-Dextran in a 24-well format cell culture insert for 1h – 24h (reperfusion) in a humidified  
561 incubator. The abluminal chamber was filled with 0.5 mL of fresh complete growth medium.  
562 The concentration of TRITC-Dextran in the abluminal medium was measured at 1, 2, 4, and 24 h  
563 during reperfusion. A 50  $\mu$ L of samples from the abluminal side were collected at indicated time  
564 points. An equal volume of fresh medium was replaced to maintain the sink conditions. The  
565 concentration of TRITC-Dextran was measured using Synergy HTX multimode plate reader at

566 excitation 485/20 and emission 580/50 nm. The relative diffusion of TRITC-Dextran at each  
567 time point was calculated as the ratio of TRITC-Dextran present in the basolateral compartment  
568 between the treated groups and untreated control.

569 *Relative diffusion of TRITC – Dextran =*

$$570 \frac{\text{Amount of TRITC-Dextran in the basolateral compartment of treated cells}}{\text{Amount of TRITC-Dextran in the basolateral compartment of untreated control}} \quad (\text{Equation 2})$$

571

## 572 **2.17. Statistical analysis**

573 Statistically significant differences between the means of controls and treatment groups or  
574 within treatment groups were determined using one-way analysis of variance (ANOVA) or two-  
575 way ANOVA at 95% confidence intervals using GraphPad Prism 9 (GraphPad Software, LLC).  
576 The notations for the different levels of significance are indicated as follows: \*p<0.05, \*\*p<0.01,  
577 \*\*\*p<0.001, \*\*\*\*p<0.0001.

578

579

## 580 **3. Results**

581 **3.1. EVs retained their physicochemical characteristics and membrane integrity upon**  
582 **revival from storage conditions.**

583 We collectively refer to sEVs and m/IEVs as EVs wherever applicable. We used dynamic  
584 light scattering to measure particle size and dispersity index of freshly-isolated EVs using a  
585 Malvern Zetasizer Pro (**Fig. 1a**). Average particle diameters of freshly isolated sEV were  
586 109.9±1.1 nm with a dispersity index (DI) of 0.39±0.02 and m/IEV was 228.8±15.35 nm with DI  
587 of 0.35±0.03 (**Fig. 1a**). The representative particle size distribution (PSD) of sEV and m/IEV  
588 were depicted in **Fig. S1a-b**. It should be noted that intensity-weighted PSD of sEV showed

589 about 74% of particles were < 200 nm in diameter ranging from 20 nm to 197 nm (**Fig. S1a**).  
590 PSD of m/IEV showed about 54% of particles were >200 nm particle diameter ranging from 200  
591 nm to 500 nm (**Fig. S1b**). It is known that EVs are heterogenous in size and the larger EVs are  
592 known to show diameters ranging from 100 – 1000 nm<sup>32</sup>. Next, We studied the effect of storage  
593 conditions on the retention of physicochemical characteristics of hCMEC/D3 BEC-derived sEVs  
594 and m/IEVs using dynamic light scattering (**Fig. S1c-h**). During freeze-thaw (FT) cycles, sEV  
595 particle diameters significantly ( $p < 0.0001$ ) increased after the first FT cycle from 110 nm to 140  
596 nm. sEV diameter gradually increased to 150 nm at FT2 and FT3 (**Fig. S1c**). It should be noted  
597 that the sEV size remained <200 nm during the storage conditions (**Fig. S1c**). There were no  
598 significant differences in the particle diameters of m/IEVs between a freshly-isolated sample and  
599 when measured after three freeze-thaw cycles (**Fig. S1d**). The average particle diameter of  
600 m/IEV remained above 200 nm during storage conditions (**Fig. S1d**). Additionally, sEV and  
601 m/IEVs retained a consistent dispersity index after three freeze-thaw cycles (**Fig. S1e,f**). sEVs  
602 and m/IEVs showed an initial negative zeta potential of about -22 mV that ranged between -15  
603 and -30 mV after three consecutive freeze-thaw cycles (**Fig. 1a, S1g-h**). The particle  
604 concentration of freshly isolated sEVs and m/IEVs in PBS was determined using nanoparticle  
605 tracking analysis and was found to be  $4.6$  and  $5.1 \times 10^8$  particles/mL, respectively (**Fig. 1a**).

606

**a. Physicochemical characterization**

|                                       | sEVs                     | m/IEVs                   |
|---------------------------------------|--------------------------|--------------------------|
| Particle diameter (nm)                | 109.9 ± 1.1              | 228.8 ± 15.4             |
| Dispersity index                      | 0.39 ± 0.02              | 0.35 ± 0.03              |
| Zeta potential (mV)                   | -21.9 ± 1.5              | -22.1 ± 1.3              |
| Particle concentration (particles/mL) | 4.6±0.4 ×10 <sup>8</sup> | 5.1±0.6 ×10 <sup>8</sup> |

**b. Membrane integrity of sEV – freshly isolated (initial) and post-freeze-thaw (FT) cycles**

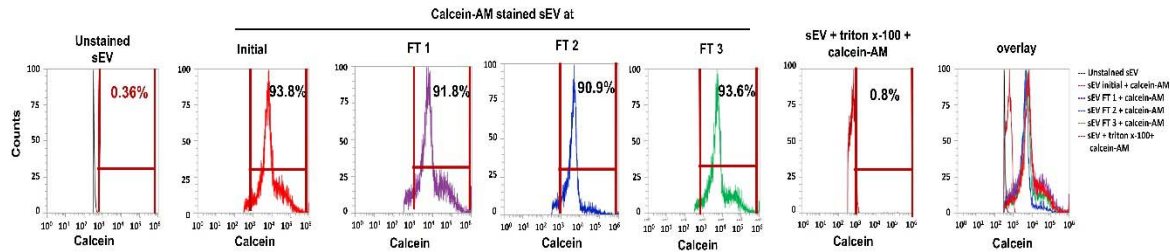

**c. Membrane integrity of m/IEV – freshly isolated (initial) and post-freeze-thaw (FT) cycles**

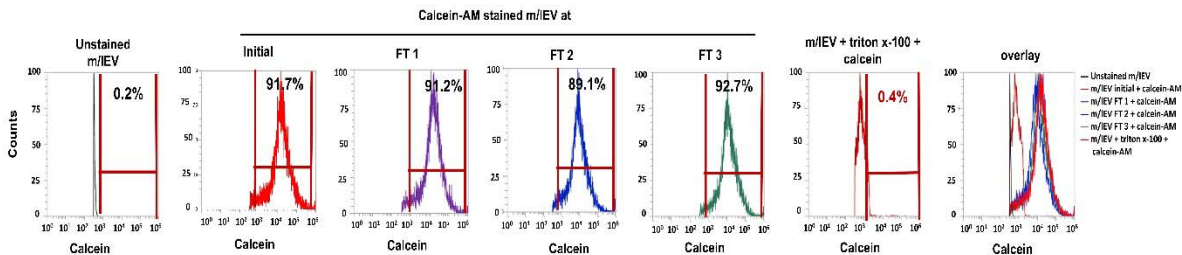

**Western blot analysis for protein-based EV characterization**

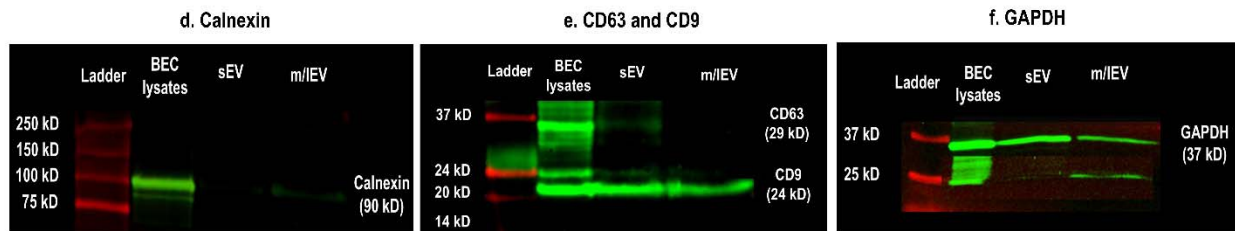

607

608 **Fig. 1. Physicochemical characteristics, membrane integrity, and protein content-based EV**  
 609 **characterization.** (a) Average particle diameters, dispersity indices, and zeta potentials of fresh  
 610 hCMEC/D3 BEC-derived EVs were determined using dynamic light scattering on a Malvern Zetasizer  
 611 Pro-Red. Samples were diluted to 0.1 mg protein/mL in 1x PBS for particle diameter and 10 mM HEPES  
 612 buffer pH 7.4 for zeta potential measurements. Data are presented as mean±SD of n=3 measurements. EV  
 613 particle concentrations were measured using nanoparticle tracking analysis (NTA). For NTA, stock  
 614 samples of sEV and m/IEV were diluted 100 times in PBS and analyzed on a multiple-laser ZetaView f-  
 615 NTA Nanoparticle Tracking Analyzer (Particle Metrix Inc., Mebane, NC). Three 60 s videos were  
 616 acquired at 520 nm laser wavelengths for particle diameter and concentration measurements. Average  
 617 particle concentrations were reported as mean ± standard deviation of n=3 measurements. (b-c) The  
 618 histograms of calcein-positive events of intact sEVs (b) and m/IEVs (c) at initial and post-three FT cycles  
 619 were detected using a small particle side scatter 488/10-nm filter in an Attune flow cytometer. Unstained

620 EVs were used to gate the histograms for estimating percentage calcein-positive counts. **(d-f) Detection of**  
621 **membrane protein markers of sEVs and m/IEVs-derived from hCMEC/D3 cells using western blot**  
622 **analysis. Western blot shows the relative expression of calnexin (90 kD), CD63 (29 kD), CD9 (24 kD),**  
623 **and GAPDH (37 kD) protein in sEVs and m/IEVs.** The total protein content in the cell lysates, sEV, and  
624 m/IEV was measured using a micro BCA assay. Fifty  $\mu\text{g}$  protein/sample was incubated with Laemmli  
625 sample buffer at  $95^{\circ}\text{C}$  for 5 min. The sample was run on sodium dodecyl sulfate-polyacrylamide gel  
626 electrophoresis, proteins were transferred to a nitrocellulose membrane, and the membrane was incubated  
627 with a blocking buffer. The blot was incubated with primary antibodies overnight at  $4^{\circ}\text{C}$ , and secondary  
628 antibodies at room temperature. The blots were imaged on the 800 nm channel using an Odyssey imager  
629 (LI-COR Inc. Lincoln, NE) at intensity setting 5 and processed using ImageStudio 5.2 software.  
630 **Uncropped western blots of triplicate runs are shown in Fig. S3.**

631  
632 The membrane integrity of EVs upon revival from cold storage was determined using a  
633 previously reported calcein-based flow cytometry assay<sup>19</sup>. Prior to analyzing the EVs, we first  
634 calibrated the flow cytometer using polystyrene beads of particle diameters ranging from 0.1 to 2  
635  $\mu\text{m}$  using a small particle side scatter filter (488/10 nm, BL1) (**Fig. S1i**). The relative position of  
636 EV clusters in the FSC/SSC overlay plots was proportional to the particle diameter since an  
637 increase in diameter showed a right-upward shift of the clusters. Notably, sEVs and m/IEVs  
638 clusters overlapped to a large extent in the area corresponding to 0.1-0.2  $\mu\text{m}$  bead diameters  
639 suggesting that this protocol allowed us to detect EV-sized particles (**Fig. S1j**). The particle  
640 counts for PBS/calcein AM, unlabeled-sEVs and m/IEVs, PBS/Triton X-100/calcein AM  
641 mixture (sample processing controls) were acquired on SSC/BL1 density plots and were used for  
642 gating calcein AM positive signals. About 90% of freshly-isolated sEVs and m/IEVs were  
643 calcein-positive suggesting that EVs retained intact membranes after the ultracentrifugation and  
644 resuspension processes (**Fig. 1b-c**). Importantly, >85-90% sEVs and m/IEVs maintained their  
645 membrane integrity after three consecutive freeze-thaw cycles confirming the lack of significant  
646 membrane damage during and upon revival from storage conditions (**Fig. 1b-c**). In addition, EVs  
647 lysed with Triton X-100 showed less than 10% calcein-positive particle counts demonstrating the  
648 specificity of calcein signal intensities associated with the intact EVs (**Fig. 1b-c**).



649

650 We additionally performed an ATP assay to determine if EVs retained their functionality  
651 upon revival from frozen storage conditions. HBMECs exposed to OGD conditions for 24 h  
652 showed about a 60% reduction in relative ATP levels compared to normoxic HBMECs (**Fig.**  
653 **S2a,b**). Importantly, HBMECs treated with freshly isolated sEVs at 50  $\mu$ g EV protein in OGD  
654 conditions showed about a three-fold ( $p < 0.0001$ ) increase in relative ATP levels compared to  
655 untreated cells (**Fig. S2a**). OGD HBMECs treated with 50  $\mu$ g sEV protein (sEVs were revived  
656 after three subsequent freeze/thaw cycles) showed a similar increase in relative ATP levels  
657 compared to untreated cells (**Fig. S2a**). Importantly, there were no statistical ( $p > 0.05$ ) differences  
658 between relative ATP levels of HBMECs treated with either freshly isolated sEVs or sEVs post-  
659 freeze/thaw. Like sEV, OGD HBMECs treated with freshly isolated m/IEV showed about a four-  
660 fold and statistically significant ( $p < 0.0001$ ) increase in relative ATP levels compared to  
661 untreated cells (**Fig. S2b**). Importantly, there was no statistical ( $p > 0.05$ ) difference between  
662 relative ATP levels of HBMECs treated with either freshly isolated m/IEV or freeze/thaw-  
663 subjected m/IEV. These observations suggest that EVs retain their functionality after frozen  
664 storage conditions.

665

666 Per the MISEV 2018 guidelines for protein-based characterization of EVs, we used the  
667 following categories of protein markers (**Fig. 1a**). **a.** *Transmembrane proteins associated with*  
668 *the plasma membrane and/or endosomes: tetraspanins CD63 and CD9. b. Cytosolic proteins*  
669 *recovered in EVs: GAPDH. c. Transmembrane and soluble proteins associated with other*  
670 *intracellular compartments than plasma membrane/endosomes: ATP5A and TOMM20. d.*  
671 *Lastly, we used the lack of calnexin (an endoplasmic reticulum marker) as a purity marker to*



672 confirm the lack of cellular contaminants in EVs. We performed western blot analysis for protein  
673 content-based characterization of freshly isolated sEVs and m/IEVs (**Fig. 1d-f**). We evaluated the  
674 expression of calnexin (endoplasmic reticulum marker, **Fig. 1d**), CD63 (exosome or sEV marker,  
675 **Fig. 1e**), CD9 (a common marker for both sEV and m/IEV, **Fig. 1e** (14)), and GAPDH (**Fig. 1f**)  
676 in our EV samples (**Fig. 1d**).

677  
678 Calnexin was used as a control to evaluate whether sEVs and m/IEVs contained endoplasmic  
679 reticulum (ER) contaminants. BEC cell lysates showed a strong band of calnexin at 75 kD as  
680 expected (**Fig. 1d**). sEV did not show any calnexin expression, whereas m/IEV showed a faint  
681 band suggesting that sEVs are free of ER contaminants and m/IEV contained minimal ER  
682 contaminants (**Fig. 1d**). Next, only sEV showed CD63 expression whereas m/IEV did not show  
683 CD63 band at its characteristic molecular weight of 28 kD suggesting the purity of sEV isolation  
684 (**Fig. 1e**). Lastly, CD9 tetraspanin, a common 25 kD EV membrane protein marker, was seen in  
685 both sEVs and m/IEVs (**Fig. 1e**). Both EVs expressed GAPDH (**Fig. 1f**). The presence of  
686 GAPDH in sEV and m/IEV in our western blot is likely due to the incorporation of cytosolic  
687 components in EVs during their biogenesis.

688  
689 **3.2. m/IEVs contain mitochondria and transfer their mitochondrial load to recipient**  
690 **primary HBMECs and hCMEC/D3 cells.**

691 We studied the morphology of naïve sEVs and m/IEVs using transmission electron  
692 microscopy (TEM, **Fig. 2a-b**). Negative stain TEM analysis showed sEV of <200 nm—scale bar  
693 (**Fig. 2a**). Negatively stained m/IEV showed structures >200 nm (**Fig. 2b**). It should be noted

694 that our TEM images are comparable to the published literature (16). The raw images of the  
695 selected EVs are shown in **Fig. S4a,b**.

696 We acquired multiple TEM images of cross-sectioned m/IEVs (**Fig. 2c and Fig. S5**). The  
697 blue arrow points to the m/IEV membrane, whereas the maroon arrow points to mitochondria in  
698 m/IEVs. Mitochondria were detected as electron dense structures in the lumen of m/IEVs (**Fig.**  
699 **2c**). Notably, m/IEVs contain one or multiple mitochondria with varying sizes and morphologies  
700 (**Fig. 2c**). The uncropped raw images of the data shown in **Fig. 2c** are presented in **Fig S4a,b**. In  
701 contrast, images of sEV cross-sections looked empty and did not contain electron dense  
702 structures in the lumen (yellow arrow, **Fig. 2b**), suggesting the absence of mitochondria in sEVs.  
703 The structure and shape of the mitochondria in m/IEVs (**Fig. 2c**) were comparable with the  
704 mitochondria observed in the hCMEC/D3 cell buds/protrusions (**Fig. S4**). The high-speed  
705 centrifugation and extensive sample processing during the sample pelleting step prior to cutting  
706 ultrathin sections for TEM imaging likely resulted in the observed mitochondrial morphology.  
707 We noted mitochondria structures with a characteristic double membrane that were highly  
708 similar to published reports<sup>33-36</sup>. It should also be noted that these previous reports have  
709 demonstrated functional activity of the m/IEV/extracellular mitochondria. Our data showed that  
710 m/IEV- and not sEV sections contained mitochondria.

711  
712 We performed a western blot analysis of sEV and m/IEV lysates for determining the presence  
713 of mitochondrial proteins, including ATP5A (subunit of the mitochondrial ATP synthase) and  
714 TOMM20, an outer mitochondrial membrane protein (**Fig. 2e**). Our data showed that while both  
715 sEVs and m/IEVs contained ATP5A protein, TOMM20 was selectively present in m/IEVs (**Fig.**  
716 **2e**). This suggests that while sEVs contain mitochondrial proteins, only m/IEVs contain

717 mitochondria. The western blot aligned with the TEM data confirming the presence of  
718 mitochondria in m/IEVs. Collectively, our data demonstrate the presence of mitochondria in the  
719 m/IEVs but not sEVs.

720

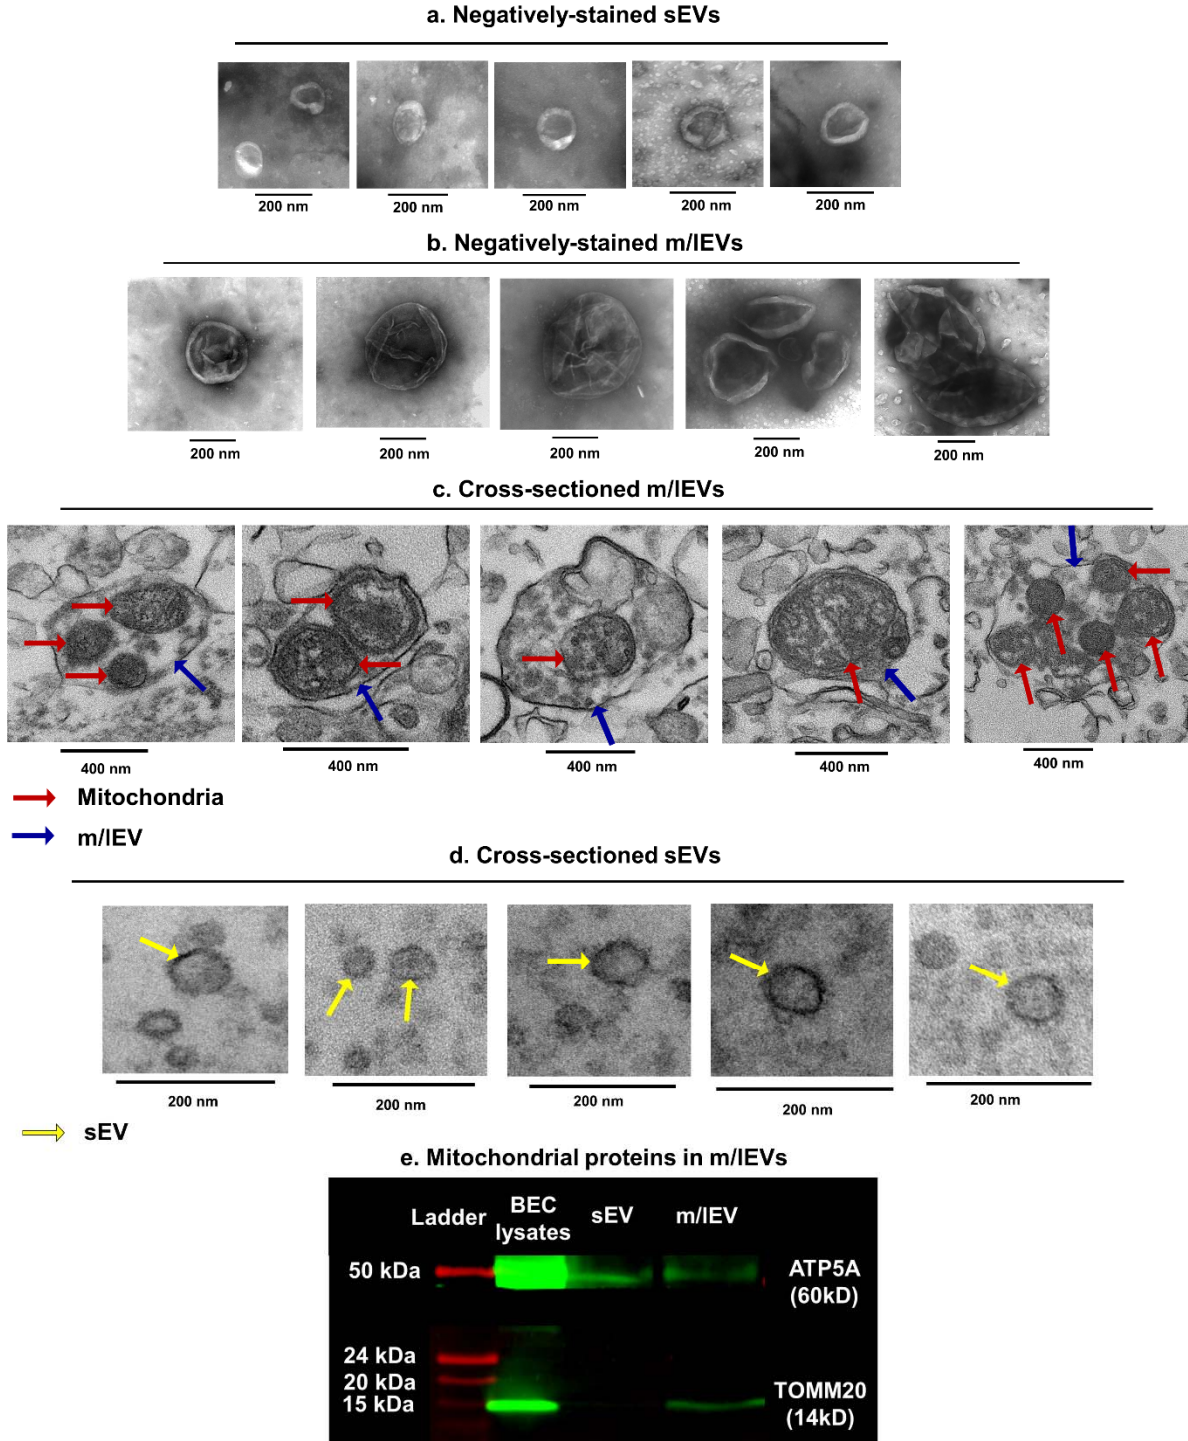

721

722 **Fig. 2: Transmission electron microscopy and western blot analysis of sEVs and m/IEVs.** Negative  
723 stain TEM images of hCMEC/D3-derived sEV (a) and m/IEV (b). Representative TEM images of  
724 sectioned m/IEVs (c) and sEVs (d). m/IEVs (blue arrow) contained one or more mitochondria (electron-  
725 dense structures, maroon arrows). sEV cross sections (yellow arrow) lacked electron-dense structures in  
726 the lumen. Scale bars of 400 nm and 200 nm. (e) Detection of mitochondrial proteins in sEVs and m/IEVs  
727 using western blot analysis. The uncropped western blots of triplicate runs are shown in Fig. S7a,b.

728

729

730 Next, we wanted to determine if EVs can transfer their mitochondrial load into the recipient  
731 primary human brain microvascular endothelial cells (HBMECs) (**Fig 3a-c**). We isolated sEVs  
732 and m/IEVs from hCMEC/D3 cells pre-stained with Mitotracker Red (MitoT-red). **First, we**  
733 **performed cytocompatibility of MitoT-red stained EVs at the same doses i.e., 30, 75, and 150  $\mu$ g**  
734 **EV protein/cm<sup>2</sup> for 72 h in normoxic conditions (**Fig. S8**). Untreated cells were used as control,**  
735 **whereas polyethyleneimine, PEI, at 50  $\mu$ g/mL was used as a positive control for the ATP assay.**  
736 **PEI-treated BECs showed a significant ( $p < 0.0001$ ) decrease in cell viability (**Fig. S8**) suggesting**  
737 **the sensitivity and functionality of ATP assay measuring the cell viability of treated BECs.**  
738 **HBMECs treated with MitoT-red-sEV and MitoT-red-m/IEV at 10, 30, and as high as 150  $\mu$ g**  
739 **EV protein/cm<sup>2</sup> for 72 h did not show any significant reduction in BECs viability (**Fig. S8**),**  
740 **suggesting that MitoT-red-EVs were cytocompatible with recipient BECs up to 150  $\mu$ g EV**  
741 **protein/cm<sup>2</sup> for 72 h exposure.**

742

743 HBMECs were treated with MitoT-red-sEV and MitoT-red-m/IEV at 30 to 150  $\mu$ g EV  
744 protein/well for 72 h and MitoT-red signals in the recipient HBMECs were measured using flow  
745 cytometry. The intensity of MitoT-red-EVs in the recipient HBMECs (**Fig. 3a-c**) was analyzed  
746 using histogram plots. Untreated HBMECs cells were used as control and were gated for data  
747 analysis. Cells pre-stained with MitoT-red were used as a positive control and showed about  
748 82% MitoT signals suggesting the presence of polarized mitochondria (**Fig. 3a**). Cells treated  
749 with unstained m/IEV did not show any MitoT-red signals in HBMECs suggesting the absence  
750 of non-specific MitoT signals (**Fig. 3a**). Cells treated with MitoT-red-m/IEV at a low dose of **30**  
751  **$\mu$ g dose** showed about 32% MitoT-positive signals suggesting mitochondrial transfer into the

752 recipient HBMECs (**Fig. 3a, d**). The fraction of cells showing MitoT+ve signals increased from  
753 61% at 75  $\mu$ g to 68% at 150  $\mu$ g m/IEV dose (**Fig. 3a, d**). Cells treated with EV (sEV: m/IEV 1:1)  
754 at 75  $\mu$ g EV protein showed about 54% MioT-red signal intensity suggesting that inclusion of  
755 m/IEVs in the EV mixture treatment increased mitochondrial transfer to HBMECs (**Fig. 3b, d**).  
756 sEVs at lower doses of 30 and 75  $\mu$ g protein per well showed <5% of mitochondrial transfer that  
757 increased to only about 13% at the 150  $\mu$ g dose (**Fig. 3c, d**). As expected, m/IEVs showed a  
758 greater transfer of mitochondria into recipient HBMECs compared to sEVs consistent with the  
759 presence of mitochondria in m/IEVs (**Fig. 2c-e**).

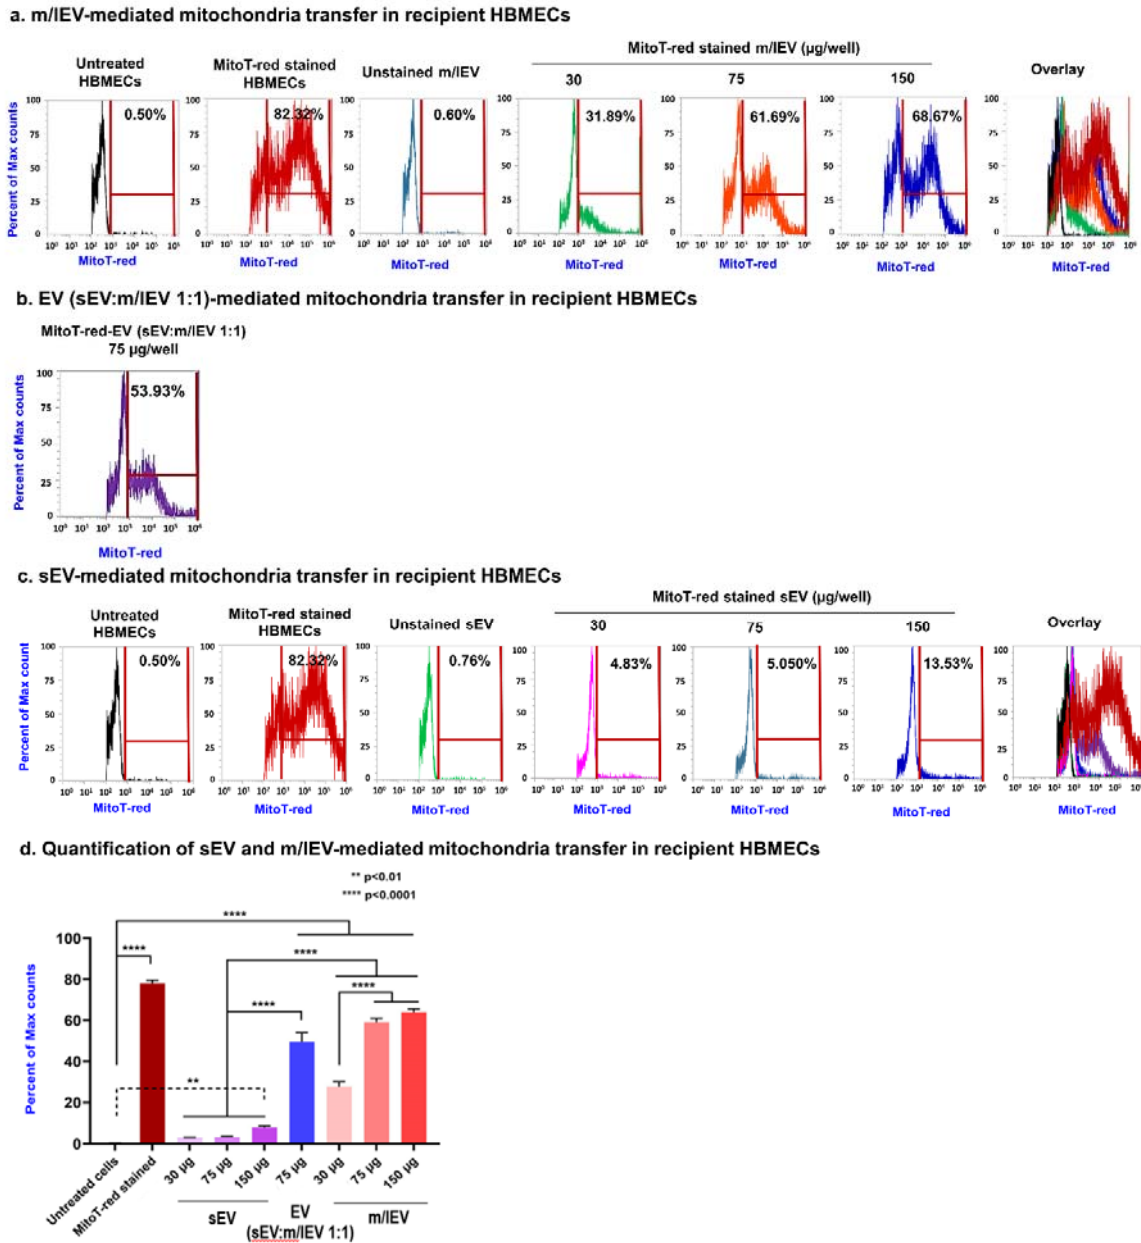

760

761 **Fig. 3. Transfer of EV mitochondria into recipient HBMECs cells at varying doses.** HBMECs cells  
 762 were cultured in 48-well plates for 48 h in a humidified incubator. Cells were then incubated with the  
 763 indicated amounts of MitoTracker red-labeled samples: (MitoT-red)-sEV, MitoT-red-EV (at a 1:1  
 764 sEV:m/IEV ratio, collectively referred to as EVs) and MitoT-red-m/IEV diluted in complete growth  
 765 medium for 72 h. Post-incubation, the cells were washed, collected, and run through the Attune NxT flow  
 766 cytometer. The histograms of hCMEC/D3 cells treated at indicated doses of MitoT-red-m/IEVs (**a**),  
 767 sEV:m/IEV 1:1 (**b**), and sEV (**c**) were collected using a 674/10-nm side scatter filter in the Attune flow  
 768 cytometer. Untreated HBMECs and unstained EVs were used as controls to gate the background signals  
 769 in histograms. MitoT-red-stained HBMECs were used as a positive control to gate the histograms for  
 770 MitoT-red-positive counts. Subsequently, this gate was applied to quantify the percentage of MitoT-red  
 771 HBMECs treated with MitoT-red-EVs. (**d**) Quantification of sEV and m/IEV-mediated mitochondria  
 772 transfer in recipient HBMECs. Data represent mean±SD of n=3.



773

774 We also studied EV-mediated mitochondrial transfer into recipient hCMEC/D3 cells (**Fig.**  
775 **S9**). Consistent with our observations from the HBMECs, hCMEC/D3 cells treated with MitoT-  
776 red-m/IEV showed a dose-dependent increase in mitochondrial transfer from 48% at 30  $\mu$ g to  
777 68% at 150  $\mu$ g dose (**Fig. S9a,c**). We noted a dose-dependent increase in the mitochondrial  
778 transfer that increased from 13% at 30  $\mu$ g sEV to about 33% at the 150  $\mu$ g dose (**Fig. S9b,c**).  
779 Interestingly, sEV-mediated a greater extent of mitochondrial transfer into hCMEC/D3 cells  
780 compared to the levels noted in primary HBMECs (33 vs. 13%) (**Fig. 3c and Fig. S9b**). We  
781 performed additional flow cytometry studies at lower MitoT-red EV doses (i.e., 10, 25, and 50  
782  $\mu$ g EV protein/well) in 48-well plates and have added the data in **Fig. S10**.

783

### 784 **3.3. EVs transferred polarized mitochondria to recipient primary HBMECs.**

785 We tested if EV mitochondria can be transferred into the recipient BECs by isolating EVs  
786 from donor BECs pre-stained with MitoT-red. We subsequently incubated recipient BECs with  
787 MitoT-red-EVs and observed MitoT-red signals for 24 to 72 h using fluorescence microscopy.  
788 We first determined the uptake of EV-associated mitochondria in recipient primary HBMECs  
789 and hCMEC/D3 cells. The recipient HBMECs or hCMEC/D3 cells were treated with  
790 Mitotracker red-stained EVs (MitoT-red-EV) for 72 h prior to observation with epifluorescence  
791 microscopy. No MitoT-red-associated signals were observed in unstained/untreated primary  
792 HBMECs, and HBMECs treated with only MitoT-red (100  $\mu$ M for 30 min in complete culture  
793 medium) showed purple puncta in Cy5 channel, suggesting that only MitoT-red specific signals  
794 were detected under the Cy5 channel (**Fig. 4a**). MitoT-red-sEV at 10 and 25  $\mu$ g doses did not  
795 show positive signals in HBMECs for 48 h; however, MitoT-red-sEV at 50  $\mu$ g doses showed



796 faint intracellular Cy5 signals at 48 and 72 h, suggesting low levels of uptake after 48 h (**Fig 4a**).

797 In contrast, strong intracellular signals in HBMECs treated with MitoT-sEV+m/IEV at the 25  $\mu$ g

798 (**Fig. 4a**) dose suggested that the inclusion of m/IEVs in the EV mixture led to an efficient uptake

799 of polarized mitochondria into HBMECs. Moreover, the increase in the sEV+m/IEV-mediated

800 mitochondrial transfer was statistically significant ( $p<0.01$ ) at 48 h compared to sEVs alone (**Fig.**

801 **4b**).

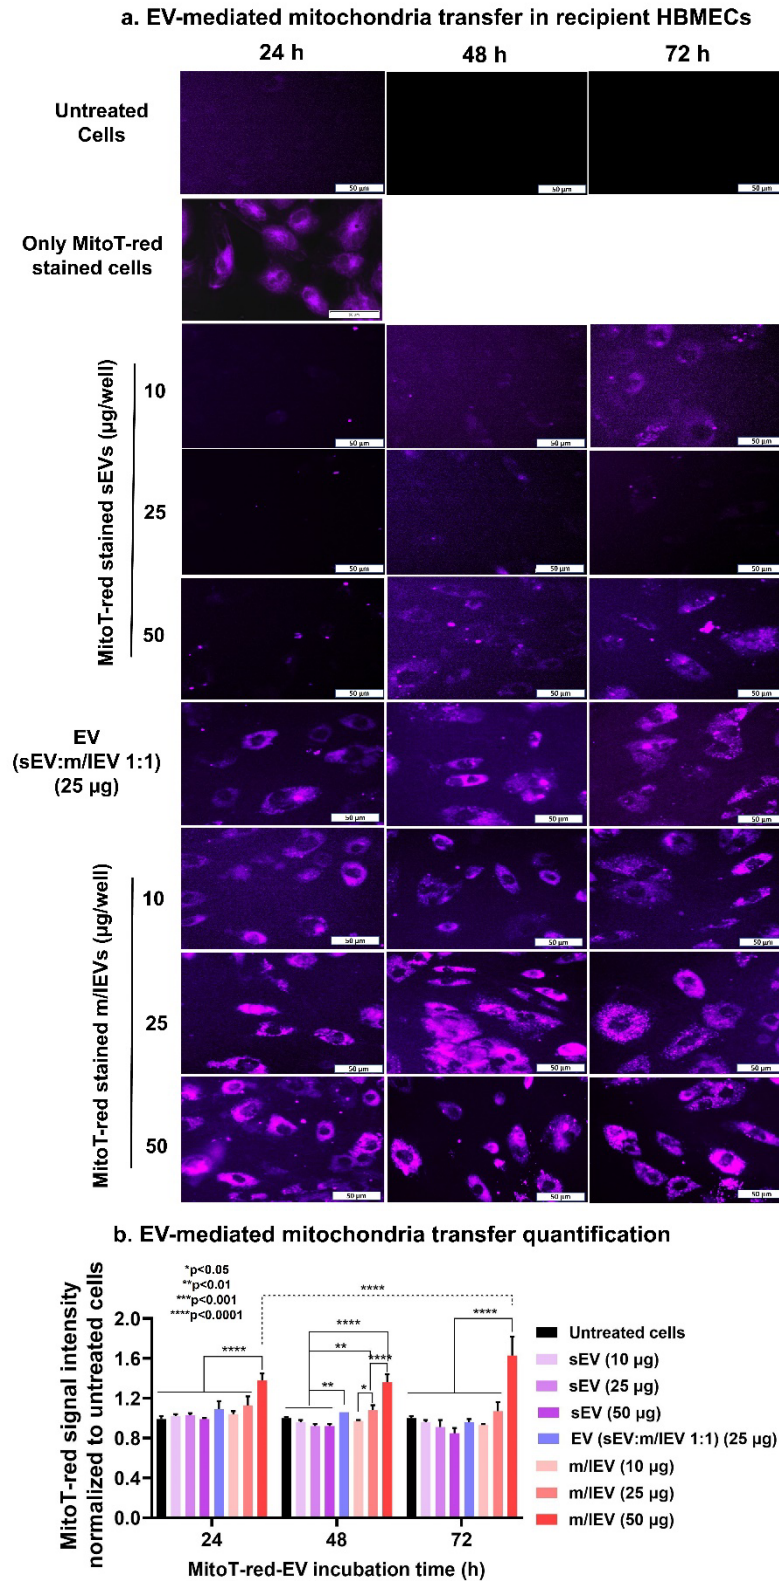

802

803 **Fig. 4. Transfer of EV mitochondria into the recipient HBMEC at varying doses and incubation**  
 804 **times.** (a) HBMECs were cultured in 96-well plates until 80% confluency in a humidified incubator.

805 Cells were then incubated with the indicated amounts of MitoTracker red-labeled samples: (MitoT-red)-  
806 sEVs, MitoT-red-EV (at a 1:1 sEV: m/IEV ratio), MitoT-red-m/IEVs diluted in complete growth medium  
807 for 24, 48, and 72 h. Post-incubation, the cells were washed and incubated with phenol-red-free growth  
808 medium. Intracellular MitoT-red-sEV/sEV:m/IEV/m/IEV signals were observed under an Olympus IX 73  
809 epifluorescent inverted microscope using Cy5 channel (purple puncta) at 20x magnification. Scale bar: 50  
810  $\mu\text{m}$ . **(b)** EV mitochondria transfer quantification. HBMECs were treated with the indicated samples and  
811 doses for 24, 48, and 72 h. At each time point, from each control and treatment group, at least three  
812 images were acquired and the total sum of grayscale signal intensities in the Cy5 channel was estimated  
813 using Olympus CellSens software. The measured intensities were normalized with those of the untreated  
814 cells.

815

816 Interestingly, MitoT-red-m/IEV at a dose as low as 10  $\mu\text{g}$  showed efficient uptake in  
817 HBMECs 72 h post-exposure. The levels of uptake increased significantly ( $p < 0.0001$ ) as the  
818 dose of MitoT-red-m/IEV increased from 10 to 50  $\mu\text{g}$  at 48 h (**Fig. 4a,b**). The superior transfer of  
819 m/IEV-mediated mitochondria into HBMECs is likely due to a greater enrichment of functional  
820 mitochondria in the m/IEVs compared to sEVs. Therefore, we expected that m/IEVs may  
821 increase the cellular bioenergetics of the recipient BECs at lower doses compared to sEVs. We  
822 further confirmed the effect of dose and type of EV subtype (m/IEVs vs. sEVs) on the transfer of  
823 mitochondria into hCMEC/D3 cells (**Fig. S11a**). Similar to the observations noted in the primary  
824 HBMEC cultures at 72 h post-exposure, sEVs at 50  $\mu\text{g}$  protein/well showed faint MitoT-red+  
825 signals in the recipient hCMEC/D3 cells, whereas cells treated with m/IEVs showed a dose-  
826 dependent increase ( $p < 0.01$ ) in mitochondrial transfer compared to sEV-treated cells (**Fig.**  
827 **S11a,b**).

828

829 We additionally studied the uptake of EV mitochondria into the recipient HBMECs at  
830 different time points, including 4, 8, 16, 24, 48, and 72 h (**Fig. S12**). We incubated primary  
831 HBMECs with MitoT-red-stained m/IEVs and sEVs at a 30  $\mu\text{g}$  EV protein dose. EV  
832 mitochondria (purple puncta) in recipient HBMECs were again observed under Cy5. HBMECs  
833 treated with MitoT-red-stained m/IEVs for 4 h did not show MitoT-red signals in the recipient

834 cells; however, faint purple signals were observed at 8 and 16 h incubation times (**Fig. S12a**).  
835 These data indicate that m/IEV mitochondrial transfer in recipient HBMECs takes about 8 to 16  
836 h of exposure. m/IEV incubation for 24 h resulted in intense MitoT-red associated purple puncta  
837 in HBMECs, suggesting efficient m/IEV mitochondria transfer into HBMECs (**Fig. S12a**). At 48  
838 h exposure time, m/IEV MitoT-red signals increased compared to 24 h and remained consistent  
839 for 72 h. It can be inferred that m/IEVs show time-dependent mitochondria transfer, wherein  
840 mitochondria transfer from m/IEV to HBMECs was likely initiated at about 8 h, peaked at 48 h,  
841 and persisted for at least 72 h in recipient HBMECs (**Fig. S12a**).

842  
843 In contrast, incubation of MitoT-red-stained sEVs with HBMECs for 4 to 48 h did not show  
844 any MitoT-red signals in HBMECs, suggesting a considerably lower mitochondrial load in the  
845 sEVs compared to m/IEVs (**Fig. S12b**). HBMECs treated with MitoT-red-stained sEVs for 72 h  
846 showed only faint MitoT-red signals (**Fig. S12b**). The representative images of EV mitochondria  
847 load transfer into the recipient HBMEC at varying EV doses for 24 h are shown at higher  
848 magnification in **Fig. S13**.

849  
850 **3.4. EV-transferred mitochondria colocalized with the mitochondrial network in the**  
851 **recipient BECs.**

852 We wanted to determine if EV-mitochondria colocalized with the mitochondrial network of  
853 the recipient BECs. We isolated MitoT-red-stained polarized mitochondria from the donor BECs  
854 and the recipient BEC mitochondria were prestained using Mitotracker green (MitoT-green).  
855 Post-treatment of the recipient BECs, the overlap of these fluorescent signals was observed under  
856 an epifluorescent microscope. HBMECs and hCMEC/D3 cells prestained with Mitotracker green

857 were subsequently incubated with MitoT-red-sEVs and MitoT-red-m/IEVs at 10, 25, and 50  $\mu$ g  
858 doses for 72 h. Cytosolic, diffuse MitoT-green signals were observed under the GFP channel  
859 whereas punctate MitoT-red EV signals were captured under the Cy5 channel (purple puncta).  
860 The prestaining of HBMECs with Mitotracker green resulted in robust fluorescent signals for 72  
861 h and incubation with Mitrotracker red-stained EVs did not affect the Mitotracker green signals.

**a. EV mitochondria colocalization with recipient HBMEC mitochondria**

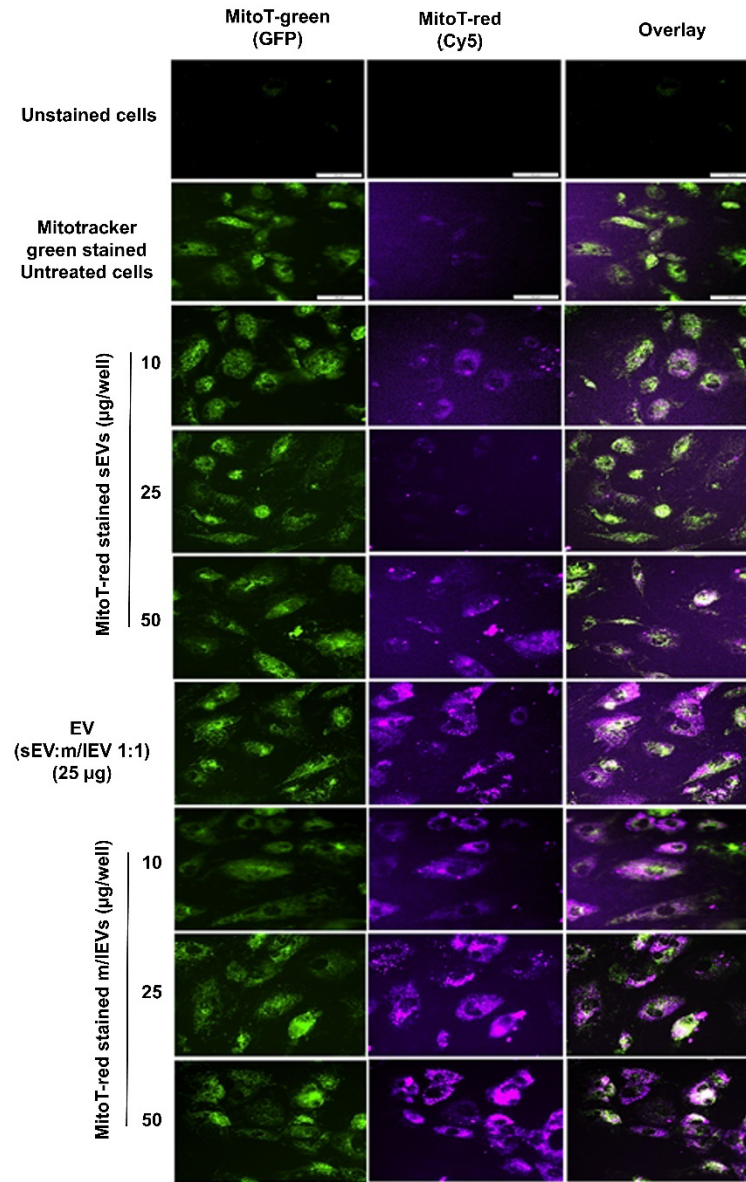

**b. Quantitative analysis of EV mitochondria colocalization with recipient HBMEC mitochondria**

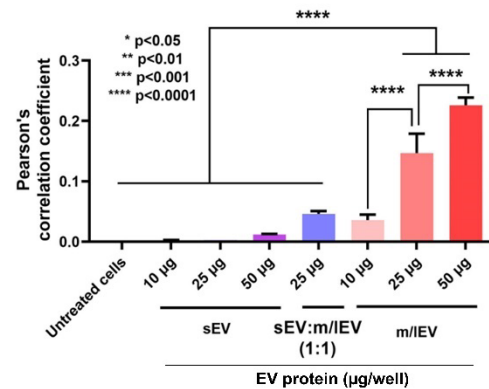

863 **Fig. 5. Colocalization of EV mitochondria with the recipient HBMEC mitochondria.** (a) HBMECs  
864 were cultured in 96-well plates until 80% confluency in a humidified incubator. HBMECs were stained  
865 with Mitotracker Green for 30 min. Post-staining, the cells were washed and treated with the indicated  
866 doses of MitoT-red-sEV, MitoT-red-EVs (at a 1:1 sEV: m/IEV ratio, collectively referred to as EVs), and  
867 MitoT-red-m/IEV for 72 h. Untreated cells and cells stained with MitoTracker Green only were used as  
868 controls. Post-incubation, the treatment mixture was replaced with phenol-red-free growth medium. The  
869 Mitotracker green staining in recipient HBMEC was acquired using the GFP channel, whereas the purple  
870 fluorescence associated with EV mitochondria was captured using Cy5 channel in an Olympus IX 73  
871 epifluorescent inverted microscope. Colocalization of the mitochondria signals was confirmed by the  
872 presence of yellow signals in the overlay images. Scale bar: 50  $\mu$ m. (b) Pearson's correlation coefficient  
873 was obtained from the overlay images of Cy5 and GFP channels at constant signal intensities for both  
874 channels using a Cell Insight CX7 HCS microscope. Data are presented as mean $\pm$ SD (n=3 images per  
875 treatment group). \*p<0.05, \*\*p<0.01, \*\*\*p<0.001, \*\*\*\*p<0.0001

876

877 The absence of GFP and Cy5 signals in the untreated cells suggested the absence of non-  
878 specific signals at the respective channel settings (**Fig. 5a**). The cells prestained with MitoT-  
879 green alone showed green cytosolic signals associated with the recipient mitochondria (**Fig. 5a**).  
880 MitoT-red-m/IEVs showed a greater intensity of Cy5 signals at all tested doses compared to  
881 MitoT-red-sEVs, once again demonstrating that m/IEV contain a greater mitochondrial load  
882 (**Fig. 5a**). The overlay images of recipient HBMEC mitochondria and EV-associated polarized  
883 mitochondria in the m/IEV-treated cells showed considerably higher colocalization compared to  
884 sEV-treated cells (**Fig. 5a**). The Pearson's correlation coefficient (PCC) of GFP and Cy5 channel  
885 intensities demonstrated that m/IEV exposure resulted in a statistically significant (p<0.0001),  
886 greater degree of mitochondria colocalization compared to sEVs (**Fig. 5b**). Similar to the  
887 primary HBMECs, hCMEC/D3 cells prestained with Mitotracker green and treated with MitoT-  
888 red-m/IEVs showed a greater degree of colocalization indicated by the overlap of MitoT-green  
889 and MitoT-red signals compared to sEV-treated cells (**Fig. S14**).

890 We performed additional microscopic studies (**Fig. S15 and S16**) to confirm that the  
891 observed PCC in **Fig. 5b** for colocalization of MitoT-red m/IEVs with MitoT-green-stained



892 recipient cell mitochondria is specific to MitoT-red signals. The details are explained in **Fig. S15**  
893 **and S16** of the supplementary file.

894

895 We further confirmed the colocalization of EV-mitochondria with mitochondria of the  
896 recipient BECs using an orthogonal technique that allowed us to confirm that the EV-  
897 mitochondria colocalized with the mitochondrial matrix in the recipient BECs. HBMECs were  
898 first transduced with CellLight Mitochondria-GFP (CellLight-MitoGFP) before MitoT-red-EV  
899 treatment. Despite the low absolute frequency of transduction<sup>37</sup>, the cells showed strong GFP  
900 fluorescence suggesting that CellLight-MitoGFP transduction effectively tagged the alpha  
901 pyruvate mitochondrial matrix protein in the recipient HBMECs (**Fig. S17**). Similar to **Fig. 5**,  
902 MitoT-red-m/IEV at a dose of 50 µg showed efficient transfer of mitochondria (purple puncta)  
903 into the recipient HBMECs. The EV MitoT-red puncta signals colocalized with recipient  
904 mitochondria (CellLight-MitoGFP) at 72 h post-exposure. Notably, cells exposed to MitoT-red  
905 m/IEVs showed stronger Cy5 signals compared to MitoT-red-sEV-treated cells confirming again  
906 that m/IEVs contain more mitochondrial load compared to sEVs. The Cy5 signal intensity in  
907 m/IEV-treated cells was considerably increased at 72 h post-exposure compared to the 24 h time  
908 point suggesting that 72 h is an optimal exposure period for m/IEVs internalization into the  
909 recipient HBMECs (**Fig. S17**). Importantly, the overlap of the structural protein-tagged recipient  
910 BEC mitochondria with the MitoT-red-stained m/IEVs indicates that the m/IEV-delivered  
911 mitochondria colocalized with the recipient cell mitochondria.

912

913 **3.5. Naïve EVs increased HBMEC ATP levels under normoxic and hypoxic conditions.**



914       Once we confirmed EV mitochondria transfer to the recipient BECs, we determined the  
915 relative ATP levels of EV-treated BECs under normoxic and hypoxic conditions. One of the  
916 main functions of mitochondria is to synthesize ATP from ADP during mitochondrial aerobic  
917 respiration, and therefore, we measured relative ATP levels in the recipient BECs treated with  
918 sEVs or m/IEVs using a luciferase-based ATP assay. The effect of BEC-derived EVs on the ATP  
919 levels in recipient primary HBMECs was first evaluated under normoxic conditions using an  
920 ATP assay. Primary HBMECs were treated with sEVs and m/IEVs at 10, 25, and 50  $\mu$ g EV  
921 protein per well for 24, 48, and 72 h. **Fig. 6a** shows that the increase in HBMEC ATP levels  
922 upon sEV and m/IEV treatment for 24 h was not statistically significant ( $p>0.05$ ). Importantly,  
923 HBMECs treated at a dose of 25  $\mu$ g sEVs for 48 h showed a significant ( $p<0.01$ ) increase in ATP  
924 levels compared to untreated cells. Interestingly, cells treated with m/IEVs at 25 and 50  $\mu$ g doses  
925 showed a dose-dependent and significant ( $p<0.0001$ ) increase in relative ATP levels compared to  
926 untreated cells. In addition, the m/IEV-mediated increase in ATP levels was significantly  
927 ( $p<0.05$ ) higher compared to sEVs after 48 h exposure (**Fig. 6b**). At 72 h post-exposure, m/IEVs  
928 at 25 and 50  $\mu$ g doses showed a dose-dependent and significant ( $p<0.01$ ) increase in relative  
929 ATP levels compared to untreated cells under normoxic conditions (**Fig. 6c**). In contrast, sEVs  
930 did not show any significant increase in relative HBMEC ATP levels compared to the control. In  
931 addition, m/IEV-treated HBMECs showed significantly higher ATP levels compared to sEVs at  
932 72 h at all tested doses. Thus, the m/IEV-mediated significant increase in relative ATP levels at  
933 48 h (**Fig. 6b**) and 72 h (**Fig. 6c**) may likely be due to their innate mitochondrial load—including  
934 mitochondria, mitochondrial DNA, and mitochondrial proteins.

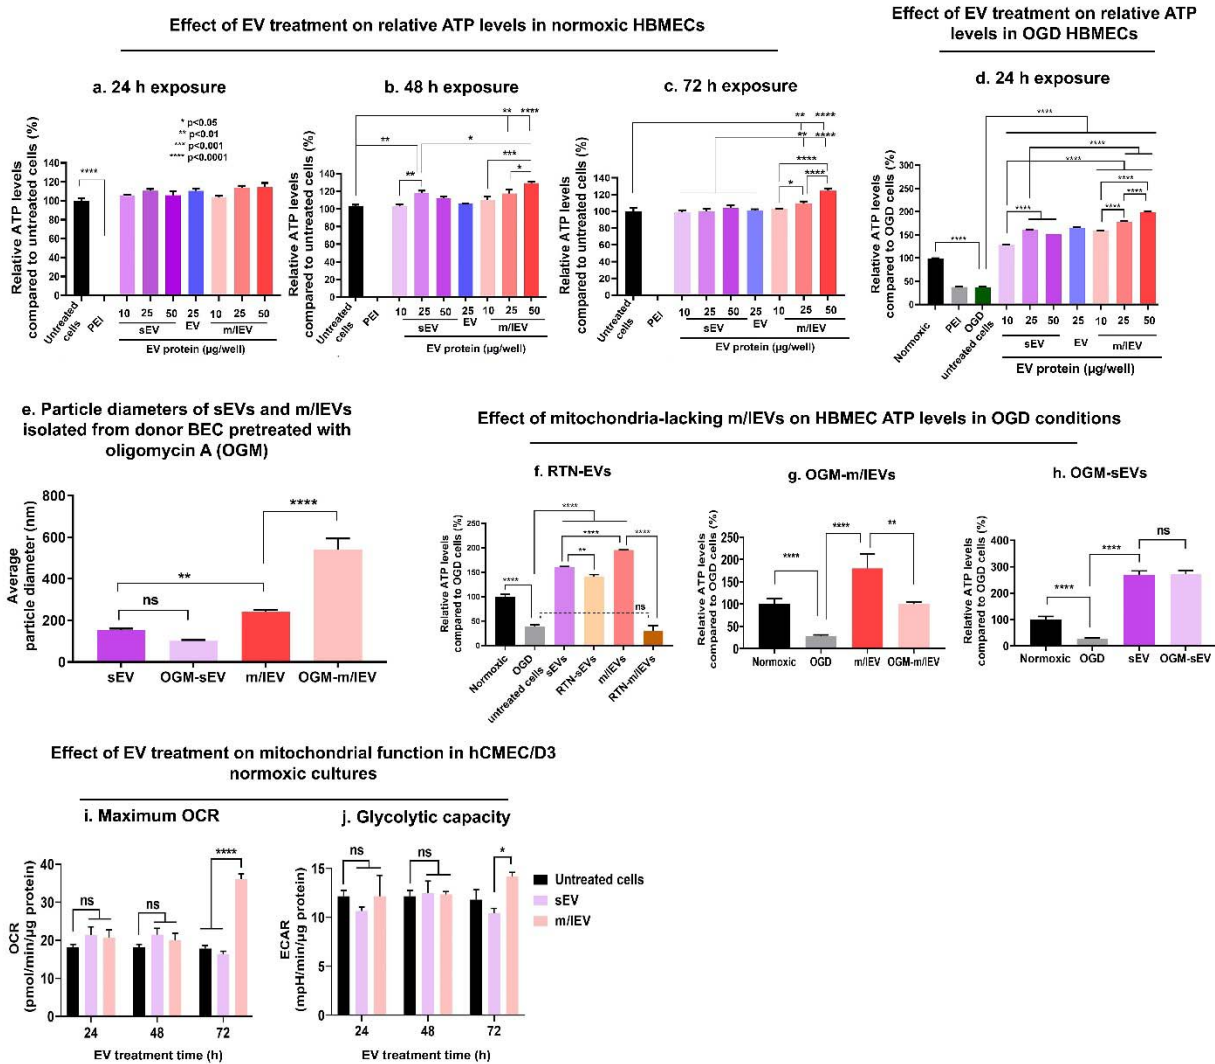

9:

936 **Fig. 6. EV-mediated increase in HBMEC ATP levels and mitochondrial respiration during**  
 937 **normoxic and hypoxic conditions.** HBMEC cells were cultured in the 96-well plates until 80%  
 938 confluency in a humidified incubator. (a-c) Confluent monolayers were treated with sEV, m/IEV, and  
 939 EVs (sEV: m/IEV 1:1) at the indicated amounts for 24 (a), 48 (b), and 72h (c). Polyethyleneimine, PEI, at  
 940 50 µg/mL was used as a positive control for the ATP assay. Post-treatment, cells were incubated with a  
 941 1:1 mixture of fresh growth medium and Cell titer Glo reagent. The relative luminescence units (RLU) of  
 942 the samples were measured using a SYNERGY HTX multimode plate reader at 1s integration time.  
 943 Relative ATP levels were calculated by normalizing the RLU of treatment groups to the RLU of control,  
 944 untreated cells. (d) Confluent HBMECs were treated with the indicated doses of sEV and m/IEV in OGD  
 945 medium and cell viability was measured 24 h post-treatment while untreated cells were used as a control.  
 946 Data represent mean ±SD (n=3). (e) Particle diameters of naïve and OGM-EVs. EVs were isolated from  
 947 either untreated hCMEC/D3 cells (naïve sEVs and m/IEVs) or cells pretreated 1 µM of oligomycin A  
 948 (OGM-sEV and OGM-m/IEVs). Naïve and OGM-EVs were suspended in 1x PBS at 0.1 mg EV  
 949 protein/mL concentration and particle diameters were measured using Malvern Zetasizer Pro. (f-h) Effect  
 950 of RTN-EV and OGM-EVs treatment on HBMEC ATP levels in OGD conditions. Recipient HBMECs  
 951 were incubated with naïve, RTN-EVs, and OGM-sEVs. EVs were isolated from the conditioned medium  
 952 of hCMEC/D3 BECs pretreated with 1 µM OGM for 4 h. Confluent HBMECs were treated with the

953 indicated samples at 25  $\mu\text{g}$  EV protein/well in OGD condition for 24 h. Normoxic cells and cells treated  
954 with OGD medium (untreated cells) were used as controls. Post-treatment, relative ATP levels were  
955 measured using the Cell Titer Glo-based ATP assay. Data represent mean  $\pm$ SD (n=3). (i-j) EV-mediated  
956 increase in recipient cell mitochondrial respiration and glycolysis capacity: Cells were cultured in a  
957 Seahorse XF96 plate for 4 days at 20,000 cells/well. sEV, and m/IEV were diluted in complete growth  
958 medium at 3.4  $\mu\text{g}$  EV protein/well and cells were incubated in a humidified incubator for 24, 48, and 72  
959 h. Post-treatment at each time point, the medium was replaced with DMEM and maximum oxygen  
960 consumption rate (OCR) (i), and glycolytic capacity (j) by measuring extracellular acidification rate  
961 (ECAR) were analyzed using the Seahorse XFe96 analyzer. Data represents mean $\pm$ SEM (n=3). \* p<0.05,  
962 \*\* p<0.01, \*\*\* p<0.001, \*\*\*\* p<0.0001.

963

964 We then exposed primary HBMECs under oxygen-glucose deprived (OGD) conditions for  
965 24 h to simulate ischemic conditions (**Fig. S18**). We studied the effects of naïve sEVs and  
966 m/IEVs on the cell survival of OGD-exposed primary HBMECs. HBMECs in OGD medium  
967 were incubated with sEVs and m/IEVs at 10, 25, and 50  $\mu\text{g}$  EV protein/well for 24 h. The  
968 relative ATP levels of EV-treated HBMECs were compared with untreated HBMECs maintained  
969 in an OGD medium (**Fig. 6d**). sEV and m/IEV at all treated doses showed a significant  
970 (p<0.0001) increase in relative ATP levels compared to control, untreated HBMECs (**Fig. 6d**). In  
971 addition, an increase in sEV and m/IEV dose from 10 to 25  $\mu\text{g}$  EV protein/well showed a  
972 significant (p<0.0001) increase in ATP levels. HBMECs treated with m/IEVs at 50  $\mu\text{g}$ /well  
973 showed a maximum, ca. five-fold increase in ATP levels compared to untreated cells.  
974 Importantly, m/IEVs showed significantly (p<0.0001) higher HBMEC ATP levels compared to  
975 sEVs at the same dose (25 and 50  $\mu\text{g}$ ), suggesting that m/IEVs outperformed sEVs in increasing  
976 HBMEC cellular energetics under ischemic conditions. We also confirmed the EV-mediated  
977 increase in endothelial ATP levels under OGD conditions in the recipient hCMEC/D3 cells (**Fig.**  
978 **S19**). Consistent with the primary HBMECs, hCMEC/D3 cells treated with sEVs and m/IEVs at  
979 10, 25, and 50  $\mu\text{g}$  EV protein/well showed about a three to four-fold increase in endothelial ATP  
980 levels compared to untreated cells. Moreover, the EV-mediated increases in ischemic

981 hCMEC/D3 ATP levels were dose-dependent. Lastly, m/IEV-treated ischemic hCMEC/D3 cells  
982 showed a greater increase in ATP levels compared to sEV-treated cells (**Fig. S19**).

983

984 We conducted the following studies to study the effects of EV mitochondria. We isolated  
985 sEVs and m/IEVs from donor hCMEC/D3 cells pre-treated with oligomycin A (OGM,  
986 mitochondria electron transport complex V inhibitor) to determine if the m/IEV-mediated  
987 increase in recipient HBMEC ATP levels was associated with m/IEV mitochondria. Donor  
988 hCMEC/D3 cells were treated with OGM at 1  $\mu$ M concentrations for 4 h in a complete culture  
989 medium. Then cells were washed with 1x PBS and incubated with serum-free medium for 24 h  
990 in a humidified incubator at 37°C. Post-incubation, OGM-sEVs, and OGM-m/IEVs were isolated  
991 from the EV-conditioned medium using the sequential ultracentrifugation method. First, we  
992 measured particle diameters of naïve and OGM-EVs using dynamic light scattering (**Fig. 6e**).  
993 Naïve sEV showed a particle diameter of about 150 nm whereas OGM-sEV showed particle  
994 diameters of about 110 nm (**Fig. 6e**). There was no statistical difference between particle  
995 diameters of naïve sEV and OGM-sEVs suggesting that OGM-mediated inhibition of  
996 mitochondria function in donor cells did not affect the physicochemical properties of sEVs. On  
997 the other hand, naïve m/IEV showed an average particle diameter of about 220 nm that  
998 significantly ( $p < 0.0001$ ) increased to 550 nm for OGM-m/IEV (**Fig. 6e**). OGM-mediated  
999 inhibition of mitochondria function in the donor BECs selectively increased particle diameter of  
1000 OGM-m/IEVs compared to naïve m/IEVs likely due to OGM-mediated depolarization of donor  
1001 mitochondria. This depolarization likely increased mitochondria fission and subsequent  
1002 mitophagy that may have led to the incorporation of a greater number of depolarized  
1003 mitochondria in m/IEVs<sup>38</sup>. The increased mitochondrial load in m/IEVs likely increased OGM-

1004 m/IEV size compared to naïve m/IEVs. Since sEV did not contain mitochondria, OGM  
1005 pretreatment to the donor cells did not affect the particle diameters of OGM-sEVs.

1006 We performed an additional ATP assay to determine if the m/IEV-mediated increase in  
1007 HBMECs ATP levels was associated with m/IEV mitochondria (**Fig. 6f**). OGD treatment showed  
1008 a significant ( $p < 0.0001$ ) reduction in HBMEC ATP levels compared to normoxic cells (**Fig. 6f**).  
1009 Consistent with the above studies (**Fig. 6d**), naïve sEVs and m/IEVs showed a significant  
1010 ( $p < 0.0001$ ) increase in HBMEC ATP levels compared to the OGD control (**Fig. 6f**). m/IEV-  
1011 mediated increase in ATP levels were significantly ( $p < 0.0001$ ) higher than sEVs suggesting that  
1012 m/IEVs outperformed sEVs in increasing HBMEC cellular energetics under ischemic conditions.  
1013 Importantly, RTN-m/IEVs treated HBMECs did not show a significant ( $p > 0.05$ ) increase in ATP  
1014 levels compared to OGD control (**Fig. 6f**). Notably, at the same dose, m/IEV-mediated increase  
1015 in ATP levels were significantly ( $p < 0.0001$ ) higher than RTN-m/IEVs treatment suggesting that  
1016 the m/IEV-mediated increase in ATP levels is likely a function of their innate mitochondrial  
1017 load—including mitochondria and mitochondrial proteins. In contrast, RTN-sEV treatment  
1018 showed a significant ( $p < 0.0001$ ) increase in ATP levels compared to OGD control (**Fig. 6f**).  
1019 RTN-sEV-mediated increase in ATP levels was significantly ( $p < 0.01$ ) lower than sEVs. Notably,  
1020 the suppression of ATP is much more profound in the m/IEVs than in the sEVs, suggesting that  
1021 the increase in ATP mediated by m/IEVs is even more dependent on mitochondrial complex I  
1022 function.

1023

1024 In contrast, OGM-m/IEVs showed a significant ( $p < 0.0001$ ) decrease in HBMEC ATP  
1025 levels compared to naïve m/IEVs (**Fig. 6g**) suggesting that the m/IEV-mediated increase in ATP  
1026 levels is likely a function of their innate mitochondrial load— including mitochondria and

1027 mitochondrial proteins. In contrast, OGM-sEV treatment showed a significant ( $p < 0.0001$ )  
1028 increase in ATP levels compared to OGD control (**Fig. 6h**). OGM-sEV-mediated increase in  
1029 ATP levels was significantly ( $p < 0.01$ ) higher than sEVs (**Fig. 6h**). Notably, the suppression of  
1030 ATP is much more profound in the m/IEVs than in the sEVs, suggesting that the increase in ATP  
1031 mediated by m/IEVs is even more dependent on mitochondrial complex I and V function.

1032

### 1033 **3.6. EVs increased the oxidative phosphorylation and glycolytic functions of recipient BECs** 1034 **under normoxic conditions.**

1035 The mitochondrial function of hCMEC/D3 cells treated with EVs under normoxic conditions  
1036 was evaluated using Seahorse analysis by measuring their oxygen consumption rate (OCR).  
1037 hCMEC/D3 cells were treated with sEVs and m/IEVs at 3.4  $\mu\text{g}$  protein/well in a complete  
1038 growth medium for 24, 48, and 72 h. sEV or m/IEV-treated cells did not show changes in  
1039 maximal OCR compared to untreated cells at 24 and 48 h post-exposure (**Fig. 6i**). In contrast,  
1040 BECs exposed to sEVs and m/IEVs for 72 h showed a significant ( $p < 0.0001$ ) increase in  
1041 maximum OCR compared to control, untreated cells (**Fig. 6i**). Importantly, the m/IEV-mediated  
1042 increase in OCR was significantly ( $p < 0.05$ ) higher compared to sEV-treated cells suggesting that  
1043 m/IEVs outperformed sEVs in increasing the recipient BECs' mitochondrial function (**Fig. 6i**).  
1044 The m/IEV-mediated increase in mitochondrial function was consistent with the m/IEV-mediated  
1045 increase in cell viability (**Fig. 6c**), intracellular uptake of m/IEV mitochondria (**Fig. 3-4**), and the  
1046 co-localization of m/IEV-associated mitochondria with the recipient BEC's mitochondrial  
1047 network (**Fig. 5**).

1048

1049 We further evaluated the effects of EVs on non-mitochondrial energy generation pathways  
1050 such as glycolytic capacity in the recipient BECs. Extracellular acidification rate (ECAR) is a  
1051 key indicator of cellular glycolysis and can be determined in real-time by measuring free protons  
1052 in a Seahorse plate transient microchamber<sup>39</sup>. ECAR (basal glycolysis rate and glycolytic  
1053 capacity) was measured in hCMEC/D3 cells treated with sEVs and m/IEVs (**Fig. 6j**). We did not  
1054 note any changes in the glycolytic capacity of hCMEC/D3 cells pretreated with sEVs and  
1055 m/IEVs for 24 and 48 h compared to untreated cells. However, treatment with m/IEVs for 72 h  
1056 showed a significantly ( $p < 0.05$ ) greater glycolytic capacity compared to untreated cells and sEV-  
1057 treated cells (**Fig. 6j**). To summarize the first part of this study, our data demonstrated that (1)  
1058 m/IEVs but not sEVs contain mitochondria, (2) m/IEVs outperformed sEVs in transferring  
1059 mitochondrial components to recipient BECs, (3) m/IEVs resulted in a greater magnitude of  
1060 relative ATP levels and mitochondrial functions (OCR and ECAR) compared to sEV-treated  
1061 BECs, and (4) m/IEVs isolated from rotenone and **oligomycin A** exposed BECs did not increase  
1062 recipient BEC ATP levels.

1063

1064 The second goal of the present work was to evaluate the effects of an exogenous HSP27  
1065 protein formulated with EVs in an OGD-exposed BEC model of ischemia/reperfusion injury. We  
1066 formulated HSP27 protein with EVs and a synthetic cationic polymer, PEG-DET. We studied the  
1067 physicochemical characteristics of the formed mixtures and evaluated their effects on the  
1068 paracellular permeability of small and large molecular mass fluorescent tracers across primary  
1069 HBMECs exposed to OGD.

1070

1071 **3.7. m/IEVs showed neuroprotection in a mouse model of stroke**



1072 In this pilot experiment, we determined the feasibility of whether m/IEV treatment is safe  
1073 from any adverse effects when administered intravenously (*i.v.*) to the mice (**Fig. 7**). We treated  
1074 mice 2 h after the onset of stroke with 200  $\mu$ L of m/IEVs or vehicle. Mice were euthanized 24 h  
1075 after stroke and brains were analyzed for infarct size using 2,3,5-triphenyl tetrazolium chloride  
1076 (TTC)-stained sections (**Fig. 7a**). Despite the small cohort size, we observed a trend toward  
1077 neuroprotection (**Fig. 7b**) in m/IEV-treated mice compared to vehicle-treated mice. Importantly,  
1078 we did not observe any detrimental effect as a result of m/IEV treatment—this is a significant  
1079 finding given that this is the first report where mitochondria-containing m/IEVs were injected  
1080 into a live animal. To date, all EV stroke studies have only injected sEVs/exosomes<sup>40-42</sup>.

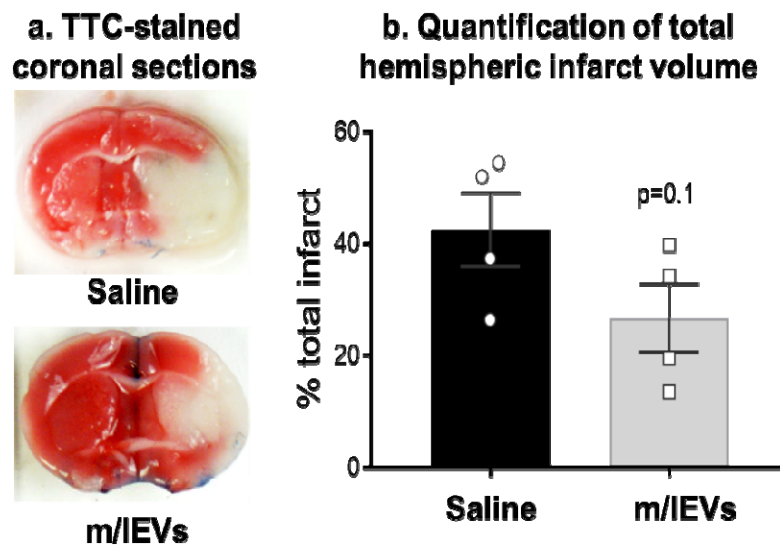

1081  
1082 **Fig. 7. Pilot study demonstrating potential neuroprotective effects of m/IEVs in a mouse middle**  
1083 **cerebral artery occlusion model of ischemia/reperfusion injury (stroke).** (a) Representative 2,3,5-  
1084 triphenyl tetrazolium chloride (TTC)-stained coronal sections of the vehicle and m/IEV-treated stroke  
1085 brains from young male mice. (b) Quantification of total hemispheric infarct volume at 24 h post-stroke.  
1086 Data are mean  $\pm$  SEM (n=4) and were analyzed using an unpaired t-test.

1087  
1088 **3.8. Exogenous HSP27 protein mixtures with PEG-DET, EVs, and PEG-DET-EV**  
1089 **mixtures.**



1090 The mixtures of HSP27 protein with PEG-DET and EVs were confirmed by studying the  
1091 electrophoretic mobility of HSP27 in a native polyacrylamide gel electrophoresis (PAGE) setup.  
1092 Native recombinant human HSP27 at the running buffer of pH 8.3 carries a net negative charge  
1093 (estimated charge: -4.2 mV)<sup>43</sup>, and therefore, it migrated from the loading spot towards the  
1094 anode during electrophoresis (**Fig. 8a**). First, the interactions of PEG-DET with HSP27 was  
1095 studied by comparing the relative changes in HSP27 band densities at polymer: protein  
1096 weight/weight (w/w) ratios ranging from 0.05:1 to 20:1 (**Fig. 8a,b**). Compared to native HSP27  
1097 (100%, **Fig. 8b**), the relative band density of PEG-DET/HSP27 mixtures at w/w 0.2:1 was  
1098 considerably reduced to about 43%. As the w/w ratios increased, there was a gradual and  
1099 significant decrease in HSP27 band densities (**Fig. 8a,b**). At PEG-DET/HSP27 w/w 10:1 and  
1100 20:1, the mean HSP27 band density decreased to nearly 25% suggesting that PEG-DET may  
1101 form electrostatic interactions with HSP27 at physiological pH. The free polymer did not show  
1102 any non-specific staining at w/w 1 and 20:1.

1103  
1104 hCMEC/D3 BEC-derived sEVs and m/IEVs were mixed with HSP27 at EV protein/HSP27  
1105 protein w/w ratios of 10:1 and the electrophoretic mobility of HSP27 was studied using native  
1106 PAGE (**Fig. 8c-d**). Mixtures of HSP27 with EVs did not affect the migration of HSP27 at the  
1107 tested w/w ratios (**Fig. 8c**). The signal intensity of free/native HSP27 was set as 100%, and the  
1108 relative band density of HSP27 in the different EV/HSP27 mixtures was compared with the band  
1109 density of native HSP27. Although the bands look similar, densitometry analysis showed that  
1110 sEV/HSP27 and m/IEV/HSP27 mixtures decreased HSP27 band densities to about  $77.5 \pm 20\%$   
1111 and  $84.1 \pm 2.4\%$  compared to native HSP27 (100%) (**Fig. 8c-d, and Fig. S20**).

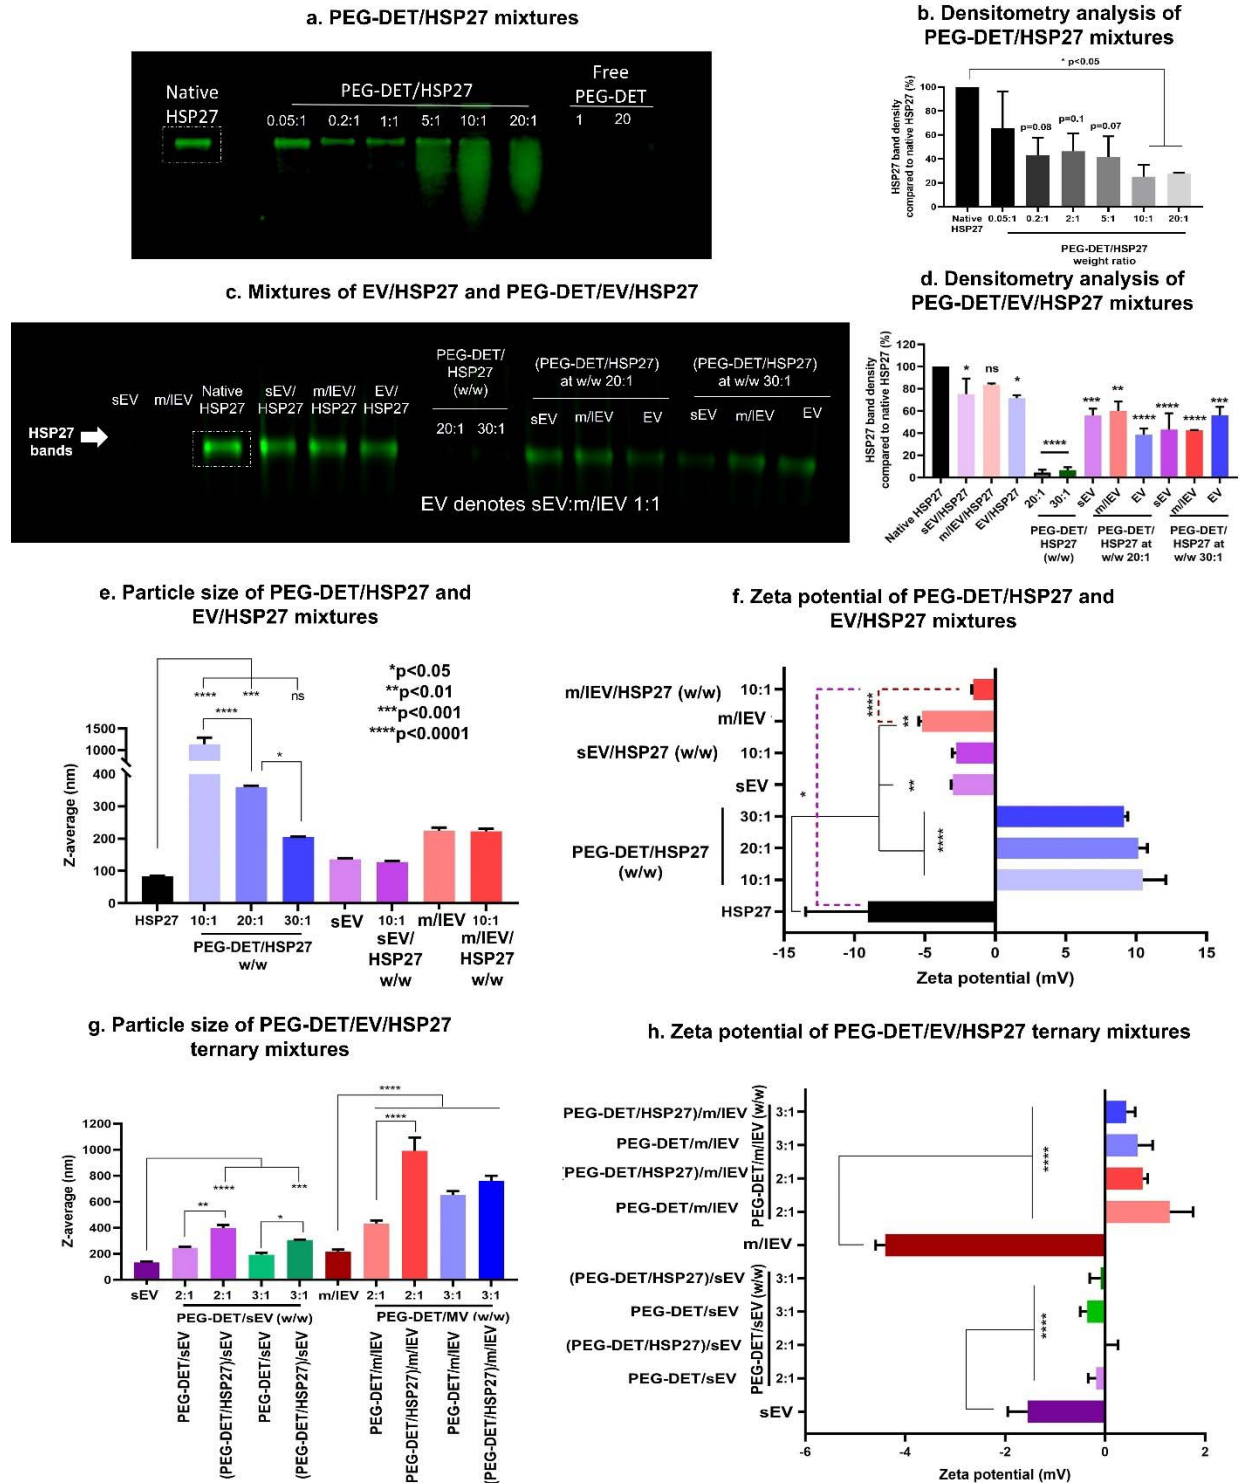

1112

1113 **Fig. 8. Formation of EV- and PEG-DET/HSP27 binary/ternary mixtures.** (a) Native polyacrylamide  
 1114 gel electrophoresis (PAGE) for PEG-DET/HSP27 mixtures. Native HSP27, PEG-DET/HSP27 at  
 1115 indicated weight ratios, and free PEG-DET polymers were mixed with 1x native sample buffer and loaded  
 1116 in an SDS-free 4-10% polyacrylamide gel at 1  $\mu$ g HSP27 per lane. (c) Native PAGE for hCMC/D3-  
 1117 derived EV/HSP27 mixtures: Native HSP27 and mixtures of sEV/HSP27, and m/IEV/HSP27 at 10:1

1118 weight/weight (w/w) ratios were loaded in a SDS-free 4-10% polyacrylamide gel at 1  $\mu$ g HSP27 per lane.  
1119 Free sEV and m/IEV equivalent to the amounts in 10:1 w/w mixtures were used as controls. Native  
1120 PAGE for (PEG-DET/HSP27)/EV ternary mixtures. PEG-DET/HSP27 mixtures were prepared at 20:1  
1121 and 30:1 w/w ratios followed by incubation with 10  $\mu$ g of EVs. The indicated samples were loaded in the  
1122 gel at 1  $\mu$ g HSP27/lane. Each gel was run at 100 V for 2 h and stained using Biosafe Coomassie G250.  
1123 The gel was then scanned at 800 nm using an Odyssey imager at intensity setting 5. **(b,d)** Densitometry  
1124 analysis was performed by measuring band densities of HSP27 in the different experimental groups in  
1125 comparison to the band density of native HSP27 in the respective gel using Image Studio 5.0 software  
1126 \* $p < 0.05$  **(e-h)** Physicochemical characterization of HSP27 mixtures with PEG-DET and EVs. Average  
1127 particle diameters **(e)**, and zeta potentials **(f)** of PEG-DET/HSP27 mixtures and EV/HSP27 mixtures at  
1128 the indicated w/w ratios. Average particle diameters **(g)**, and zeta potentials **(h)** of PEG-DET/EV and  
1129 (PEG-DET/HSP27)/EV ternary mixtures at the indicated weight ratios. The samples containing 1  $\mu$ g  
1130 HSP27 protein were diluted to 50  $\mu$ L in 10 mM HEPES buffer pH 7.4 for particle diameter  
1131 measurements. The diluted samples were further diluted to 800  $\mu$ L in 10 mM HEPES buffer pH 7.4 for  
1132 zeta potential measurements. Data represent mean $\pm$ SD (n=3). \*  $p < 0.05$ , \*\* $p < 0.01$ , \*\*\* $p < 0.001$ ,  
1133 \*\*\*\* $p < 0.0001$

1134

1135

1136 We then formulated ternary mixtures of PEG-DET/HSP27 with EVs, and the resulting  
1137 changes in HSP27 band intensity were studied using native PAGE followed by densitometry  
1138 analysis **(Fig. 8c)**. sEVs, m/IEVs, and EV/HSP27 at w/w 10:1 showed about 20-40% reduction in  
1139 band density whereas PEG-DET/HSP27 at w/w 20:1 and 30:1 showed >90% HSP27 reduction  
1140 compared to native HSP27 **(Fig. 8d)**. The HSP27 band density was decreased by 40-50% when  
1141 PEG-DET/HSP27 at w/w 20:1 were incubated with 10  $\mu$ g of sEV, m/IEV, and sEV+m/IEV 1:1  
1142 (EV). The % extent of reduction in HSP27 band density of (PEG-DET/HSP27)/EV ternary  
1143 mixtures ranged among the values noted in the case of PEG-DET/HSP27 and EV/HSP27  
1144 mixtures suggesting the competitive binding of negatively-charged EVs and HSP27 with the  
1145 positively charged PEG-DET.

1146

### 1147 **3.9. Physicochemical characterization of the HSP27 mixtures**

1148 Particle diameters and surface charge of the formed mixtures were measured using dynamic  
1149 light scattering **(Fig. 8e-h)**. The average diameter of native HSP27 protein was about 85 nm **(Fig.**

1150 **8e)**. The average zeta potential of native HSP27 (1  $\mu\text{g/mL}$  in 10 mM HEPES buffer, pH 7.4) was  
1151 about -9 mV suggesting that HSP27 exerts a net negative surface charge under physiological  
1152 conditions (**Fig. 8f**). The average particle diameter of PEG-DET/HSP27 mixtures at 10:1 w/w  
1153 ratio was over 1000 nm with a broad dispersity index. As the w/w ratio increased from 20:1 to  
1154 30:1, the particle diameter significantly ( $p < 0.05$ ) decreased from about 359 nm to 205 nm (**Fig.**  
1155 **8e**). PEG-DET/HSP27 mixtures showed a unimodal size distribution in the intensity plots (**Fig.**  
1156 **S21a**). PEG-DET/HSP27 mixtures at 10:1 w/w ratio shifted the zeta potential of the native  
1157 HSP27 protein from -9 mV to +10 mV confirming the electrostatic interactions of PEG-DET  
1158 with HSP27 (**Fig. 8f**). The zeta potentials, however, did not change for w/w ratios of 20:1 and  
1159 30:1 (**Fig. 8f**) suggesting that the excess polymer do not bind to HSP27 protein.

1160

1161 sEV and m/IEV showed diameters of about 136 and 225 nm, respectively (**Fig. 8e**). sEV  
1162 showed a bimodal particle size distribution compared to m/IEVs (**Fig. S21c,e**). sEV/HSP27 or  
1163 m/IEV/HSP27 mixtures at a 10:1 w/w ratio did not change the particle diameter compared to  
1164 naïve EVs (**Fig. 8e**). The zeta potential of m/IEV/HSP27 mixtures shifted towards near-neutral  
1165 values compared to naïve m/IEVs and native HSP27 protein indicating (**Fig. 8f**).

1166

1167 Next, PEG-DET was mixed with sEVs and m/IEVs at PEG-DET/EV w/w ratios 2:1 and 3:1,  
1168 and the resulting changes in particle sizes and zeta potentials were compared with naïve sEVs  
1169 and m/IEVs (**Fig. 8g,h**). The incubation of PEG-DET to sEV showed a considerable increase in  
1170 particle size from 134 nm to 245 nm (**Fig. 8g**). The shift in mean zeta potential from -1.55 mV to  
1171 -0.18 mV suggested the electrostatic interactions of PEG-DET and sEV (**Fig. 8h**). Furthermore,  
1172 the z-average particle diameter of (PEG-DET/HSP27)/sEV significantly ( $p < 0.01$ ) increased to

1173 about 400 nm with a near-neutral zeta potential suggesting the interactions of PEG-DET/HSP27  
1174 and sEVs (**Fig. 8g,h**). A similar trend was observed for m/IEVs where the particle diameter  
1175 gradually and significantly ( $p < 0.0001$ ) increased from naïve m/IEVs (216 nm) to PEG-  
1176 DET/m/IEV (431 nm) to (PEG-DET/HSP27)/m/IEV (991 nm) (**Fig. 8g**). A shift in zeta potential  
1177 was observed from -4 mV for naïve m/IEV to 1.29 mV for PEG-DET/m/IEV, and 0.75 mV for  
1178 (PEG-DET/HSP27)/m/IEV confirming the electrostatic interactions of PEG-DET and m/IEV  
1179 (**Fig. 8h**). In addition, an increase in PEG-DET to EV w/w ratio from 2:1 to 3:1 showed a  
1180 reduction in z-average diameter (**Fig 8g**). A slight decrease in zeta potential at PEG-DET/EV at  
1181 w/w 3:1 suggested that increasing PEG-DET amounts may increase the extent of interactions  
1182 with EVs (**Fig. 8h**). The representative distribution plots of PEG-DET/EVs and (PEG-  
1183 DET/HSP27)/EVs were shown in **Fig. S22**.

1184

1185 To summarize, PEG-DET/HSP27 mixtures showed a w/w ratio-dependent decrease in  
1186 particle diameter and an overall positive surface charge. EV/HSP27 mixtures showed  
1187 physicochemical characteristics similar to naïve EVs. The observed changes in particle diameter  
1188 and zeta potential of (PEG-DET/HSP27)/EVs confirmed the interactions of EVs with PEG-  
1189 DET/HSP27 mixtures.

1190

### 1191 **3.10. PEG-DET/HSP27 and EV/HSP27 mixtures were cytocompatible with primary** 1192 **HBMECs.**

1193 We performed an ATP assay to determine the cell viability of primary HBMECs treated with  
1194 native HSP27, m/IEV, or sEV/HSP27 and PEG-DET/HSP27 mixtures. The cell viability of  
1195 treatment groups was calculated using *Equation 1*. The average viability of cells treated with

1196 native HSP27 was 108.7% and there were no significant ( $p>0.05$ ) differences between control,  
1197 untreated cells, and native HSP27-treated groups suggesting that native HSP27 at 2  $\mu\text{g}/\text{well}$  was  
1198 well tolerated by HBMECs under normoxic conditions for 72 h (**Fig. S23**). The cell viability of  
1199 HBMECs increased significantly ( $p<0.01$ ) when treated with sEV/HSP27 (124.7%),  
1200 m/IEV/HSP27 (123.1%), and sEV+m/IEV/HSP27 (116.8%) mixtures at 10:1 w/w ratio  
1201 compared to untreated cells suggesting that EV/HSP27 mixtures were well tolerated by  
1202 HBMECs for 72 h (**Fig. S23**). The EV/HSP27 mixture-mediated increase in cell viability can be  
1203 correlated with a significant increase in HBMEC ATP levels that was observed when cells were  
1204 treated with naïve sEV (121%), m/IEV (126.4%), or sEV+m/IEV (120.1%) at amounts  
1205 equivalent those present in the EV/HSP27 mixtures. HBMECs treated with PEG-DET/HSP27  
1206 mixtures at w/w 20:1 showed an average cell viability of 100.4% suggesting that PEG-  
1207 DET/HSP27 mixtures were cytocompatible. Free PEG-DET polymer was also well tolerated by  
1208 HBMECs for 72 h. Polyethyleneimine, a positive control, at 50 and 100  $\mu\text{g}/\text{mL}$  concentrations  
1209 showed a significant ( $p<0.0001$ ) reduction in HBMEC viability indicating that the assay was  
1210 responsive to the toxicities.

1211

### 1212 **3.11. Exogenous HSP27 attenuated the hypoxia-induced increase in tight junction** 1213 **permeability in primary HBMECs**

1214

#### 1215 **3.11.1. Paracellular permeability of 4.4 kD TRITC-Dextran (a small molecule tracer) in** 1216 **pretreated HBMEC culture inserts**

1217 We measured the paracellular permeability of 4.4 kD TRITC-Dextran to evaluate the effect  
1218 of (PEG-DET/HSP27)/EV and EV/HSP27 pre-treatment on the diffusion of a small molecule-

1219 mimic across primary HBMECs during normoxic, OGD, and OGD/reperfusion conditions.  
1220 HBMECs were treated at a dose of 2  $\mu$ g/well HSP27 mixed with PEG-DET at a 20:1 w/w ratio  
1221 and with sEV, m/IEV, EVs (sEV: m/IEV=1:1) at a 10:1 w/w ratio. The total amount of EV in  
1222 EV/HSP27 mixtures was 20  $\mu$ g EV protein per insert for all the permeability assays. Native  
1223 HSP27, free PEG-DET, and naïve sEV, m/IEV, and EVs were used as controls. The difference in  
1224 the relative diffusion of 4.4 kD dextran between untreated and HSP27 mixtures-treated cells  
1225 during normoxic conditions and pre-OGD phase was not statistically significant ( $p>0.05$ ) (**Fig.**  
1226 **S24a**). During the OGD phase, native HSP27, PEG-DET/HSP27, and (PEG-DET/HSP27)/EV-  
1227 treated HBMECs showed a significant ( $p<0.05$ ) reduction in the rates of 4.4 kD dextran diffusion  
1228 compared to OGD, and free PEG-DET-treated HBMECs for 4 h (**Fig. 9a**). Besides, naïve sEV,  
1229 m/IEV, EV, and their HSP27 mixture-treated HBMECs showed a significant (at least  $p<0.001$ )  
1230 reduction in paracellular permeability for 4 h (**Fig. 9a**) of OGD exposure. sEV, m/IEV, and  
1231 EV/HSP27 mixtures showed a consistent and significant ( $p<0.001$ ) reduction in the relative  
1232 diffusion of 4.4 kD dextran for 24 h of OGD exposure (**Fig. S24b**).

1233  
1234 During the first hour of ischemia/reperfusion (OGD/reperfusion), HBMECs exposed to  
1235 native HSP27 and (PEG-DET/HSP27)/EV ternary mixtures showed a significant ( $p<0.05$ )  
1236 reduction in 4.4 kD dextran relative diffusion compared to OGD and free PEG-DET polymer-  
1237 treated cells (**Fig. 9b**). In addition, naïve sEV, EV, sEV/HSP27, m/IEV/HSP27, and EV/HSP27  
1238 pretreated HBMECs showed a highly significant ( $p<0.001$ ) decrease in the relative diffusion of  
1239 4.4 kD dextran compared to control HBMECs (**Fig. 9b**). sEV/HSP27, m/IEV/HSP27, and  
1240 EV/HSP27 mixtures treatment resulted in a consistent and significant reduction in the  
1241 paracellular permeability of 4.4 kD dextran for 2, 4, and 24 h of reperfusion compared to the



1242 OGD control (**Fig. 9c,d, and S24c**). In contrast, the relative diffusion in other treatment groups  
 1243 at 2, 4, and 24 h of OGD/reperfusion was non-significant compared to the untreated cells (**Fig.**  
 1244 **9c,d, and S24c**). It should be noted that the sEV/HSP27, m/IEV/HSP27, and EV/HSP27  
 1245 mixture-mediated decreases in 4.4 kD diffusion were not only retained for prolonged  
 1246 OGD/reperfusion times compared to (PEG-DET/HSP27)/EV (24 h vs. 2 h) but also with a  
 1247 significantly ( $p < 0.05$ ) greater magnitude (**Fig. 9** and **Fig. S24b,c**).

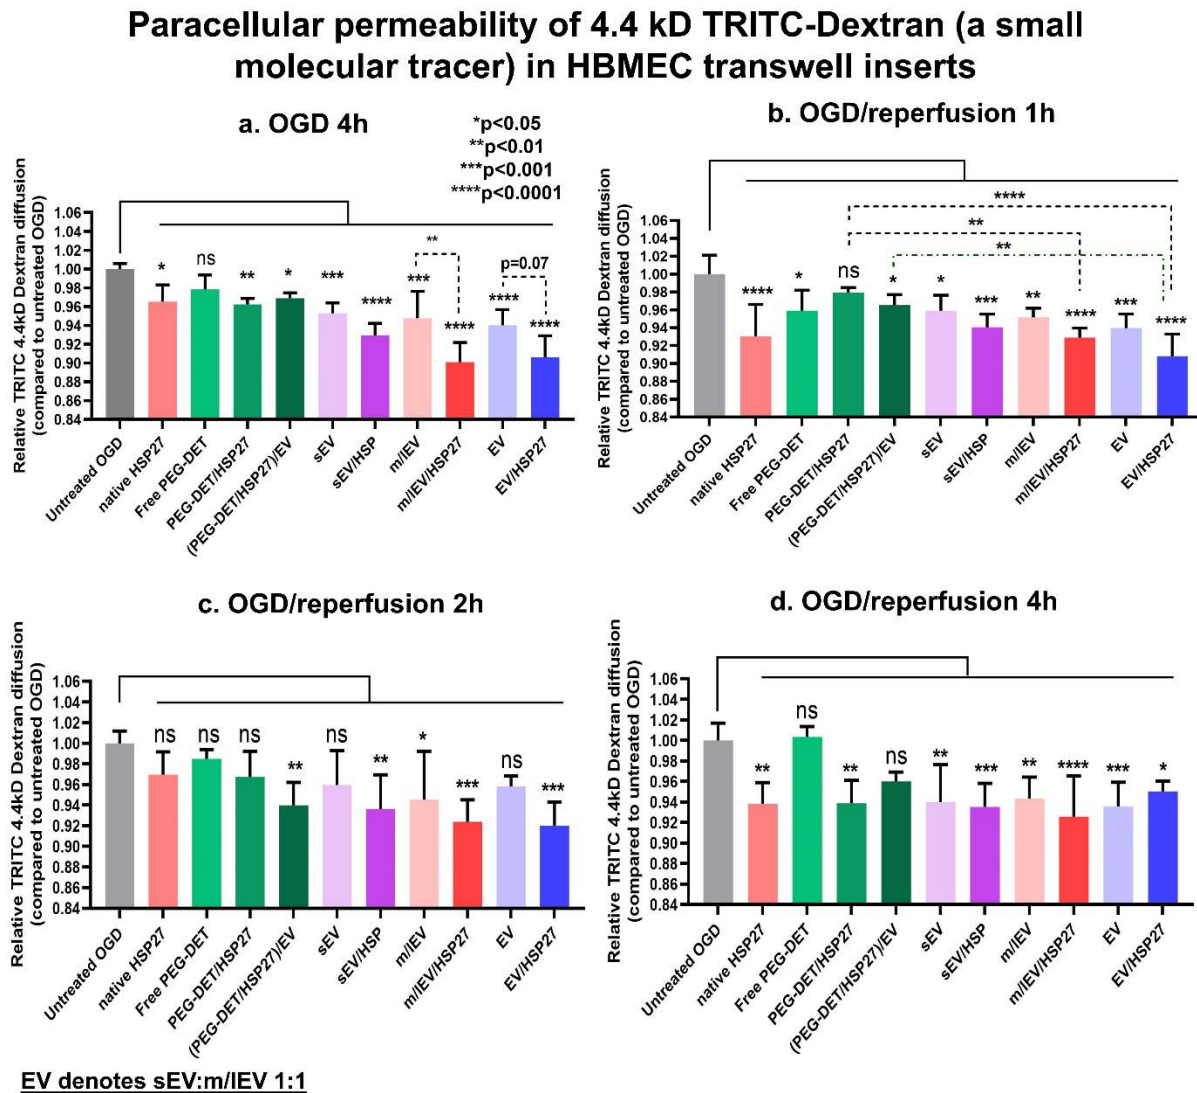

1248

1249 **Fig. 9. Paracellular permeability of 4.4 kD TRITC-Dextran under OGD, and OGD/reperfusion**  
 1250 **conditions in pretreated HBMEC transwell culture inserts.** HBMECs were seeded in 24-well plates  
 1251 and maintained in a 37°C humidified incubator for a week. The complete growth medium was replaced



1252 with 300  $\mu$ L of growth media containing indicated treatment groups for 72 h. Post-treatment, the  
1253 treatment media was replaced with 300  $\mu$ L of OGD medium containing 1  $\mu$ M 4.4 kD TRITC-Dextran for  
1254 24 h. The abluminal chamber was filled with 0.5 mL of complete growth medium. Control, untreated cells  
1255 were incubated in a complete growth medium in a humidified incubator whereas OGD treatment groups  
1256 were incubated in an OGD chamber. At 4 h post-OGD (**a**), a 500  $\mu$ L volume was collected from the  
1257 abluminal chamber and a fresh medium was added to the transwell inserts. Post-OGD treatment,  
1258 HBMECs were washed with PBS and incubated with 300  $\mu$ L of complete growth medium containing  
1259 1 $\mu$ M 4.4 kD TRITC-Dextran and incubated in a humidified incubator for 1-24h. At each time point, a 500  
1260  $\mu$ L volume was collected from the abluminal chamber and fresh medium was added to the transwell  
1261 inserts. The concentration of 4.4 kD TRITC-Dextran was measured at 1 h (OGD/reperfusion 1h, **b**), 2 h  
1262 (OGD/reperfusion 2h, **c**), and 4 h (OGD/reperfusion 4h, **d**) using a Synergy HTX multimode plate reader  
1263 at 485/20 nm excitation and 580/50 nm emission settings. The relative diffusion of TRITC 4.4 kD  
1264 Dextran at each time point was determined by calculating the ratio of [TRITC-Dextran] in the abluminal  
1265 compartment of treatment groups to that of untreated OGD control. Data represent mean $\pm$ SD (n=4). \*  
1266  $p < 0.05$ , \*\*  $p < 0.01$ , \*\*\*  $p < 0.001$ , \*\*\*\*  $p < 0.0001$ , ns: non-significant.

1267

### 1268 **3.11.2. Paracellular permeability of 65-85 kD TRITC-Dextran (a large molecule tracer)** 1269 **in pre-treated HBMEC culture inserts**

1270 The effect of HSP27 mixed with PEG-DET and EVs on the paracellular permeability of 65-  
1271 85kD TRITC-Dextran was evaluated as previously described for the small, 4.4 kDa tracer  
1272 (section 3.10.1). Here, 65-85kD TRITC-Dextran was used as a large molecular mass tracer  
1273 simulating the diffusion of large molecules such as proteins through the damaged BBB<sup>9</sup>. Prior to  
1274 subjecting cells to OGD (pre-OGD) (**Fig. S24d**), cells treated with sEV/HSP27 and  
1275 m/IEV/HSP27 mixtures showed a significant ( $p < 0.05$ ) reduction in TRITC-Dextran permeability  
1276 compared to control, untreated cells. In addition, naïve sEV, and EVs showed a considerable  
1277 decrease in 65-85 kD TRITC-Dextran permeability (**Fig. S24d**). The data suggested that naïve  
1278 sEV and m/IEV and their HSP27 mixtures may protect the barrier properties of BEC tight  
1279 junctions compared to untreated cells under normoxic conditions. Interestingly, cells treated with  
1280 native HSP27, PEG-DET/HSP27, and (PEG-DET/HSP27)/EV mixtures did not show any change  
1281 in the TRITC-Dextran relative diffusion under normoxic conditions. The observed effects of  
1282 decreased permeability were selective only for the EV-treated cells.

1283

## Paracellular permeability of 65-85 kD TRITC-Dextran (a large molecular tracer) in HBMEC transwell inserts

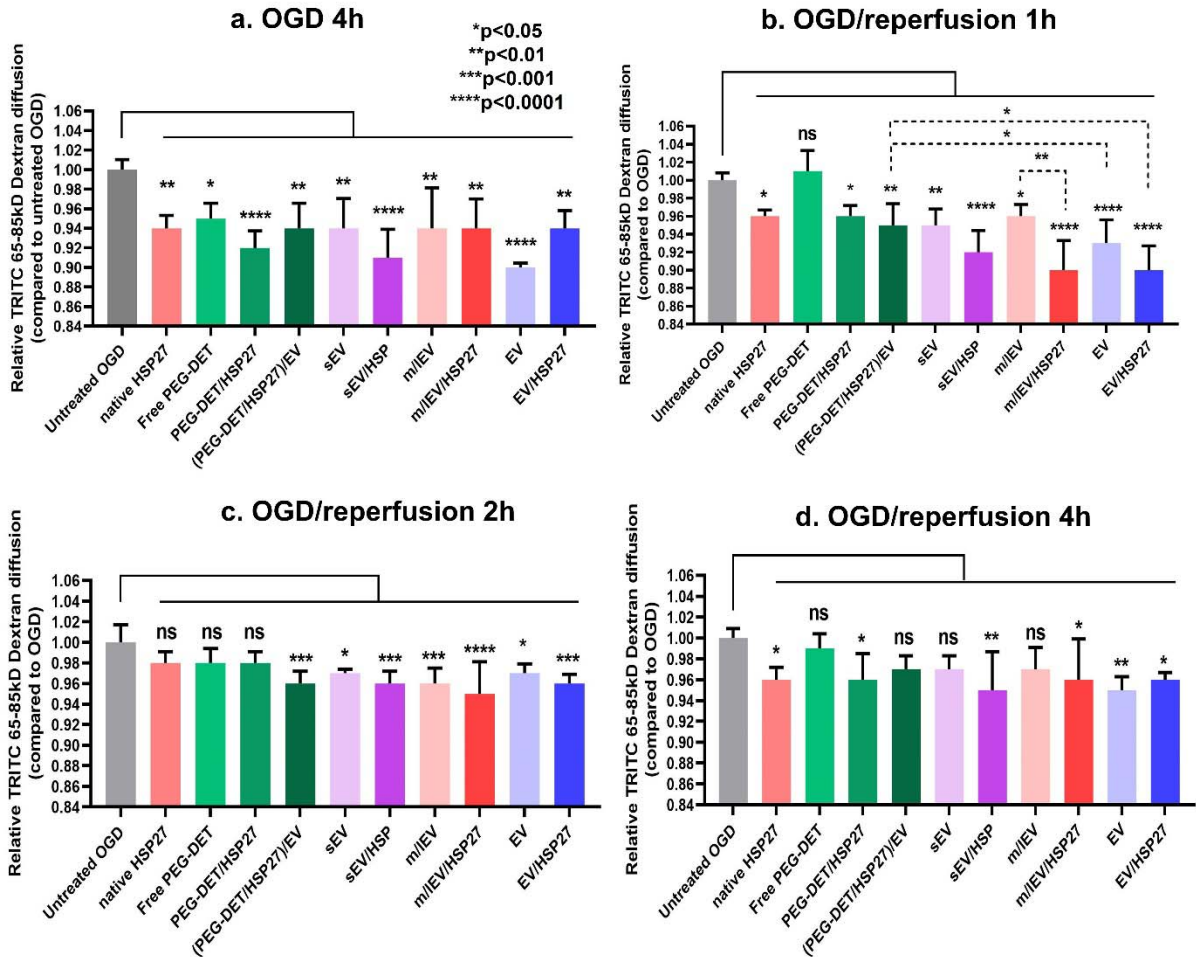

EV denotes sEV:m/IEV 1:1

1284

1285 **Fig. 10. Paracellular permeability of 65-85 kD TRITC-Dextran under OGD, and OGD/reperfusion**  
 1286 **conditions in pretreated HBMEC transwell culture inserts.** HBMECs were seeded in 24-well plates  
 1287 and maintained in a 37°C humidified incubator for a week. The complete growth medium was replaced  
 1288 with 300  $\mu$ L of growth media containing indicated treatment groups for 72 h. Post-treatment, the  
 1289 treatment media was replaced with 300  $\mu$ L of OGD medium containing 1  $\mu$ M 65-85 kD TRITC-Dextran  
 1290 for 24 h. The abluminal chamber was filled with 0.5 mL of complete growth medium. Control, untreated  
 1291 cells were incubated in a complete growth medium in a humidified incubator whereas OGD treatment  
 1292 groups were incubated in an OGD chamber. At 4 h post-OGD (a), a 500  $\mu$ L volume was collected from  
 1293 the abluminal chamber and a fresh medium was added to the transwell inserts. Post-OGD treatment,  
 1294 HBMECs were washed with PBS and incubated with 300  $\mu$ L of complete growth medium containing  
 1295 1 $\mu$ M 65-85 kD TRITC-Dextran and incubated in a humidified incubator for 1-24 h. At each time point, a  
 1296 500  $\mu$ L volume was collected from the abluminal chamber and fresh medium was added to the transwell  
 1297 inserts. The concentration of 65-85 kD TRITC-Dextran was measured at 1 h (OGD/reperfusion 1h, b), 2 h

1298 (OGD/reperfusion 2h, **c**), and 4 h (OGD/reperfusion 4h, **d**) using a Synergy HTX multimode plate reader  
1299 at 485/20 nm excitation and 580/50 nm emission settings. The relative diffusion of TRITC 65-85 kD  
1300 Dextran at each time point was determined by calculating the ratio of [TRITC-Dextran] in the abluminal  
1301 compartment of treatment groups to that of untreated OGD control. Data represent mean±SD (n=4). \*  
1302 p<0.05, \*\* p<0.01, \*\*\* p<0.001, \*\*\*\* p<0.0001, ns: non-significant.

1303

1304 HBMECs pretreated with native HSP27, PEG-DET/HSP27 and (PEG-DET/HSP27)/EV  
1305 mixtures showed a significant (p<0.01) reduction in 65-85 kD TRITC-Dextran relative diffusion  
1306 during 4 h OGD exposure (**Fig. 10a**). sEV/HSP27 and m/IEV/HSP27 mixtures showed a  
1307 significant (p<0.0001) reduction in 65-85 kD dextran relative diffusion compared to untreated  
1308 OGD cells. Naïve sEV, m/IEV, and EVs also showed a statistically significant (p<0.05)  
1309 reduction in dextran permeability under OGD conditions compared to untreated, OGD control  
1310 (**Fig. 10a**). The data suggested that PEG-DET/HSP27 and (PEG-DET/HSP27)/EV mixtures can  
1311 limit the diffusion of large molecules post-ischemia. Importantly, naïve sEV and m/IEV limited  
1312 the dextran diffusion before and OGD conditions, whereas a mixture of HSP27 and EVs showed  
1313 a synergistic effect on decreasing dextran diffusion during ischemia. Notably, there was no  
1314 difference in the 65-85 kD TRITC-Dextran relative diffusion between control and HBMECs  
1315 treated with HSP27 mixtures at 24 h of OGD exposure (**Fig. S24e**).

1316

1317 Post-OGD, the OGD medium was replaced with fresh complete growth medium to evaluate  
1318 the effects of HSP27 on ischemia/reperfusion-mediated diffusion of 65kD TRITC-Dextran.  
1319 Exposure of cells to PEG-DET/HSP27 and (PEG-DET/HSP27)/EV mixtures showed a  
1320 significant (p<0.05) reduction in relative diffusion 1 h post-ischemia/reperfusion (**Fig. 10b**).  
1321 Importantly, sEV/HSP27, m/IEV/HSP27, and EV/HSP27 mixtures showed a significant  
1322 (p<0.0001) reduction in dextran relative diffusion compared to OGD control after 1 h  
1323 ischemia/reperfusion. Moreover, naïve sEVs and EVs also showed a significant (p<0.01)

1324 reduction in diffusion after reperfusion suggesting that naïve EVs increase BEC tight junction  
1325 integrity immediately after ischemia/reperfusion. In addition, their mixtures with HSP27  
1326 synergistically reduce the large molecule infiltration across the BECs (**Fig. 10b**). Importantly,  
1327 (PEG-DET/HSP27)/EV mixtures, sEV/HSP27, m/IEV/HSP27, and EV/HSP27 mixtures showed  
1328 a significant ( $p<0.001$ ) reduction in relative diffusion compared to OGD control 2 h post-  
1329 OGD/reperfusion. sEV/HSP27, m/IEV/HSP27, and EV/HSP27 mixtures showed continual  
1330 significant ( $p<0.01$ ) reduction in 65-85 kD relative diffusion compared to OGD control for 4 h of  
1331 reperfusion, whereas changes in the relative diffusion of dextran, were insignificant ( $p>0.05$ ) in  
1332 the other treatment groups compared to OGD control (**Fig. 10c**). It can be inferred that in  
1333 addition to the naïve EV-mediated protection of tight junction integrity pre-OGD/normoxia,  
1334 during OGD, and OGD/reperfusion, their mixtures with HSP27 can protect BECs during  
1335 OGD/reperfusion. There were no further differences in dextran relative diffusion amongst the  
1336 OGD control and treatment groups during 4-24 h of ischemia/reperfusion (**Fig. 10d** and **S24f**).

1337

#### 1338 **4. Discussion**

1339

1340 This study aimed to evaluate the effects of the innate EV mitochondria and EV/HSP27  
1341 mixtures on the tight junction integrity and metabolic function of ischemic BECs. This one-two-  
1342 punch strategy allowed us to harness the innate EV mitochondria to increase cellular  
1343 bioenergetics and mixtures of EV/exogenous HSP27 protein to reduce paracellular permeability  
1344 in ischemic BECs. This novel approach to protecting the ischemic BECs can potentially limit  
1345 damage to the BBB, an integral component of the neurovascular unit. Loss of mitochondrial  
1346 function increases BBB permeability leading to a secondary injury that exacerbates post-stroke

1347 damage<sup>44</sup>. Protection of the BBB can limit early structural damage and prevent chronic  
1348 neurological dysfunction post-stroke<sup>9,44-48</sup>.

1349

1350 The present study investigated (1) the effects of the innate EV mitochondria on the  
1351 bioenergetics of recipient HBMECs under normoxic and ischemic conditions, and (2) the effects  
1352 of EV/HSP27 mixtures on the paracellular permeability of tracer molecules across ischemic BEC  
1353 monolayers. The results of our studies demonstrated that EV mitochondria, specifically m/IEVs,  
1354 transferred into and colocalized with the mitochondrial network of the recipient BECs. As a  
1355 result, EV-treated primary HBMECs demonstrated increased intracellular ATP levels and  
1356 mitochondrial respiration. Prophylactic treatment of EV/HSP27 mixtures and (PEG-  
1357 DET/HSP27)/EV ternary mixtures significantly reduced ischemia-induced paracellular  
1358 permeability of small and large tracer molecules across primary HBMEC monolayers.

1359

1360 BECs form the first layer of the BBB, and they contain about two to five-fold greater  
1361 mitochondrial content compared to peripheral endothelial cells<sup>49</sup>. BEC-derived EVs contain  
1362 BBB receptors such as transferrin and insulin that enable EVs to cross the BBB for the treatment  
1363 of various neurovascular disorders<sup>50-52</sup>. A greater mitochondrial load and their natural affinity  
1364 for BBB targeting motivated us to isolate sEVs and m/IEVs from the hCMEC/D3 BEC cell line.  
1365 We used a differential ultracentrifugation protocol, the most commonly used EV isolation  
1366 method<sup>53</sup>, to isolate m/IEVs and sEVs from the EV-conditioned medium. Post-  
1367 ultracentrifugation and resuspension, sEVs and m/IEVs showed their characteristic particle  
1368 diameters (100-250 nm, **Fig. 1a**) that largely aligned with the previous reports<sup>19, 23, 34, 54, 55</sup>.

1369

1370 We have observed an apparent discrepancy between DLS and TEM sizing of sEVs and  
1371 m/IEVs. For sEV, TEM analysis showed a smaller particle size than DLS measurements,  
1372 whereas TEM sizing of m/IEVs was larger compared to DLS. It is important to note that sEVs  
1373 and m/IEVs are heterogenous EV subpopulations with polydispersity indices  $\sim 0.4$  (**Fig. 1a**).  
1374 Therefore, the observed particle size differences of EVs measured by different techniques could  
1375 be attributed to significant differences in the operating principles and sample  
1376 handling/processing conditions. DLS estimates hydrodynamic particle diameters in a solvent,  
1377 and the hydrodynamic diameter includes the core of the particle and the liquid layer surrounding  
1378 the lipid layer. On the other hand, TEM measures the core size of an individual particle in a dried  
1379 state under a vacuum. The environmental conditions may shrink the particles due to the osmotic  
1380 diffusion of solvent from the aqueous core to the surrounding space. Importantly, TEM  
1381 represents the morphology of only a small portion of the sample, which can further be affected  
1382 by operator bias.

1383

1384 We also compared the particle size distribution of sEV and m/IEV obtained from DLS and  
1385 NTA. Although DLS and NTA are commonly used for particle size measurements, both methods  
1386 technically differ in weighing the particle size distribution (PSD). DLS reports intensity-  
1387 weighted particle size distribution, whereas NTA reports number-weighted distribution<sup>56</sup>. The  
1388 differences between the number-, volume-, and intensity-average distribution extracted from the  
1389 DLS measurements are shown in **Fig. S25a**. It should be noted that there is a significant (at least  
1390  $p < 0.001$ ) difference between sEV and m/IEV particle diameters irrespective of the type of  
1391 representation: number, volume, or intensity -averages (Fig. S3b, colored lines). As expected and  
1392 consistent with published reports, m/IEVs showed a larger particle diameter than sEV. In

1393 contrast, NTA did not show any statistical difference between sEV and m/IEV particle diameter;  
1394 instead, it showed a slightly larger sEV particle diameter than m/IEV (**Fig. S25b**).

1395

1396 Anionic phospholipid components such as phosphatidylinositol, phosphatidylserine, and  
1397 glycosylated lipid derivatives exert a net negative zeta potential on the sEVs and m/IEVs  
1398 membranes (**Fig. 1a**)<sup>57, 58</sup>. The broad polydispersity indices demonstrate the natural  
1399 heterogeneity of both EV sub-populations. Similar to cells and other biomolecules, it is  
1400 important to preserve EV physicochemical characteristics and biological activities during storage  
1401 conditions that critically determine the scope of their therapeutic application. In our studies,  
1402 sEVs and m/IEVs isolated from a conditioned medium retained their particle diameters,  
1403 dispersity indices, and zeta potential after three consecutive freeze-thaw cycles (samples were  
1404 frozen at -20°C for 24 h and then were thawed at room temperature for 1 h, **Fig. S1c-h**). Jeyaram  
1405 *et al.* showed that EVs isolated from biofluids such as blood, milk, urine, and conditioned  
1406 medium preserved their physical and functional properties stored at -80°C compared to 4° and -  
1407 20°C<sup>59, 60</sup>. Moreover, freeze-thaw cycles at -20° and -80°C did not affect the stability of plasma  
1408 exosome miRNA<sup>61</sup>.

1409

1410 Our TEM analysis demonstrated that m/IEVs, but not sEVs, contained mitochondria (**Fig.**  
1411 **2c,d**). Mitochondria-rich m/IEVs structures were consistent with published reports<sup>33-36</sup>. Prior  
1412 studies have demonstrated that mitochondria or mitochondrial components such as mtDNA, and  
1413 mitochondrial proteins were secreted into the extracellular milieu and transferred between cells  
1414<sup>34, 36, 62-67</sup>. For instance, mesenchymal stem cell-derived-m/IEVs transferred mitochondria into the  
1415 recipient macrophages leading to increased cellular bioenergetics<sup>34</sup>. Guescini *et al.* demonstrated



1416 that exosomes were released from glioblastoma and astrocytes transferred mtDNA from  
1417 glioblastoma to astrocytes<sup>68</sup>.

1418

1419 We confirmed the presence of ATP5A protein (a subunit of mitochondrial adenosine  
1420 triphosphate synthase complex<sup>23, 69</sup>) in m/IEVs using western blotting (**Fig. 2e**) as we did in our  
1421 previous studies<sup>19, 23</sup>. ATP5A plays important role in mitochondrial ATP production by  
1422 catalyzing the synthesis of ATP from ADP in the mitochondrial matrix during oxidative  
1423 phosphorylation<sup>70</sup>. A considerably higher ATP5A band density in m/IEVs compared to sEVs  
1424 suggested that m/IEVs contain a greater mitochondrial load compared to sEVs. D'Acunzo *et al.*  
1425 demonstrated the presence of ATP5A in EVs isolated from mice brains using mass spectroscopy-  
1426 based proteomic analysis<sup>71</sup>. Sanson *et al.* also reported ATP5A expression as a mitochondrial  
1427 marker in stromal cell-derived EVs using western blot analysis<sup>72</sup>. We performed western  
1428 blotting in sEVs and m/IEVs lysates to determine the presence of TOMM20, a 16 kDa outer  
1429 mitochondrial membrane protein, as an additional mitochondrial marker (**Fig. 2e**). TOMM20 is a  
1430 translocase of the outer membrane receptor that regulates the import of specific proteins from the  
1431 cytosol<sup>73</sup>. The selective presence of TOMM20 in m/IEVs and cell lysates, but not in sEVs  
1432 lysates further confirmed that m/IEVs contain mitochondria. Silva *et al.* also demonstrated the  
1433 presence of TOMM20 in mesenchymal stromal cell-derived, mitochondria containing  
1434 extracellular vesicles<sup>74</sup>. sEVs showed the presence of CD9 (**Fig. 2e**), a tetraspanin marker  
1435 associated with exosomal cargo selection, binding, and uptake of sEV by target cells<sup>75</sup>.  
1436 Collectively, our TEM images of sectioned EVs and the presence of TOMM20 in m/IEVs  
1437 indicated the presence of mitochondria in m/IEVs, whereas sEVs contain mitochondrial proteins  
1438 but not entire mitochondria.



1439

1440 We isolated sEVs and m/IEVs from the conditioned medium of Mitotracker deep red (MitoT-  
1441 red) pre-stained hCMEC/D3 cells. MitoT-red is a mitochondrion membrane potential-dependent  
1442 carbocyanine dye that selectively stains polarized mitochondria, and its fluorescence intensity is  
1443 reduced during mitochondrial depolarization <sup>76, 77</sup>. We demonstrated that m/IEVs contain a  
1444 greater mitochondrial load compared to sEVs and are colocalized with recipient BECs  
1445 mitochondria (**Fig. 3-5 and Fig. S11-17**). m/IEV-mitochondria were transferred into the recipient  
1446 BECs within 24 h of incubation. Increasing the m/IEV doses and incubation times significantly  
1447 increased uptake into the recipient BECs. Importantly, the m/IEV-mitochondria efficiently  
1448 colocalized with the mitochondria network in the recipient BECs. The co-localization of m/IEVs  
1449 and recipient BEC mitochondria was confirmed by the presence of overlapping signals of the  
1450 EV-mitochondria fluorescence signals with the recipient BEC mitochondria signals. We used  
1451 two orthogonal approaches to stain the mitochondrial network in the recipient BECs: Mitotracker  
1452 green and the CellLight mitochondria-GFP BacMam technique (**Fig. 5, and Fig. S17**). The  
1453 carbocyanine Mitotracker green dye stains the functional mitochondria whereas CellLight  
1454 Mitochondria-GFP BacMam comprising a fusion construct of  $\alpha$ -pyruvate dehydrogenase and  
1455 emGFP packaged in the baculoviral vector stains a structural mitochondrial matrix protein ( $\alpha$ -  
1456 pyruvate dehydrogenase) <sup>25, 37</sup>. Thus, utilizing two orthogonal types of staining techniques, we  
1457 demonstrated an efficient colocalization of polarized EV mitochondria with the polarized  
1458 mitochondria in the recipient BECs (via Mito-T-green staining, **Fig. 5**) and colocalization of  
1459 functional, polarized EV mitochondria with the structurally intact mitochondria in the recipient  
1460 BECs (via CellLight Mitochondria-GFP staining, **Fig. S17**). m/IEVs and sEVs showed a dose-  
1461 dependent increase in colocalization at 72 h; specifically, the m/IEVs demonstrated a

1462 significantly greater colocalization coefficient compared to sEVs (**Fig. 5b**). The selective  
1463 mitochondrial packaging into BEC-derived m/IEVs compared to sEVs was consistent with  
1464 published reports<sup>34, 66, 68</sup>. Overall, our data demonstrated the m/IEV-mediated transfer of  
1465 functional mitochondria and their colocalization with the recipient BEC mitochondrial network.

1466

1467 One of the main functions of mitochondria is to synthesize ATP from ADP during  
1468 mitochondrial aerobic respiration, and therefore, we measured relative ATP levels in the  
1469 recipient BECs treated with sEVs or m/IEVs using a luciferase-based ATP assay. Our results  
1470 demonstrated that naïve sEVs and m/IEVs mediate a dose-dependent significant increase in the  
1471 relative ATP levels at 48 h-post incubation (**Fig. 6a-c**). Importantly, m/IEVs outperformed sEVs  
1472 in increasing recipient cell viability and the effects persisted for 72 h-post incubation (**Fig. 6c**).  
1473 Islam *et al.* reported that mitochondria containing m/IEVs derived from bone marrow stromal  
1474 cells increased ATP levels of alveolar epithelial cells<sup>63</sup>. Guo *et al.* demonstrated that the transfer  
1475 of mitochondria isolated from donor bone marrow-derived mesenchymal cells (BMSC) into the  
1476 recipient BMSCs increased cellular ATP production, proliferation, and migration, and repaired  
1477 bone defects *in vitro* and *in vivo*<sup>78</sup>.

1478

1479 Numerous studies have demonstrated ischemia-induced cerebral endothelial  
1480 dysfunction/apoptosis and BBB breakdown<sup>79-82</sup>. In our studies, BECs exposed to OGD exposure  
1481 in a hypoxic chamber led to about 60% endothelial cell death at 24 h compared to untreated cells  
1482 (**Fig 6d**). The observed data is consistent with the published reports<sup>83, 84</sup>. Our results showed that  
1483 primary HBMECs treated with naïve sEVs and m/IEVs resulted in a four to five-fold increase in  
1484 endothelial ATP levels compared to control, untreated cells (**Fig. 6d**). Importantly, EV-mediated

1485 increases in ATP levels were dose-dependent and m/IEVs outperformed sEVs in rescuing the  
1486 ATP levels and consequently the survival of ischemic HBMECs 24 h post-OGD (**Fig. 6d**).  
1487 Importantly, m/IEVs isolated from rotenone- and oligomycin-exposed BECs showed a loss of  
1488 RTN-m/IEV and OGM-m/IEV mitochondria functionality to a much greater extent than RTN-  
1489 sEVs and OGM-sEVs, respectively (**Fig. 6f**). It is likely that the rotenone and oligomycin-  
1490 mediated inhibitions of mitochondrial complexes I and V in donor hCMEC/D3 BECs affected  
1491 the functional mitochondrial load in m/IEVs, hence, RTN-m/IEVs and OGM-m/IEVs showed a  
1492 dramatic and complete loss of m/IEV-mediated increase in ATP levels. Besides, consistent with  
1493 our prior results, sEVs lack entire mitochondria, and therefore, rotenone-and oligomycin-  
1494 mediated inhibitions of mitochondrial complex I in donor cells minimally affected sEV  
1495 functionality.

1496  
1497 We investigated the effects of m/IEV and sEV treatment on mitochondrial respiration and  
1498 glycolytic capacity function in the recipient BECs using a Seahorse setup. The state-of-art  
1499 Seahorse extracellular flux (XF) analyzer allows real-time analysis of extracellular acidification  
1500 rate (ECAR), an indicator of glycolysis, and the oxygen consumption rates (OCR), an indicator  
1501 of mitochondrial respiration in live intact cells<sup>85, 86</sup>. We demonstrated that m/IEVs resulted in  
1502 increased OCR compared to sEVs suggesting that m/IEV-mediated significant increase in  
1503 mitochondrial respiration may likely be due to their innate mitochondrial load—including  
1504 mitochondria and mitochondrial proteins (**Fig. 6i**). We also noted that m/IEVs showed a  
1505 significantly ( $p < 0.05$ ) greater increase in recipient BEC glycolysis capacity compared to sEVs  
1506 (**Fig. 6j**). Importantly, Phinney *et al.* demonstrated that MSC-derived EVs significantly increased  
1507 maximum OCR in the recipient macrophages compared to controls in MSC-macrophage

1508 cocultures<sup>34</sup>. Overall, through the use of these orthogonal tools (microscopy studies, ATP, and  
1509 Seahorse assays), we have demonstrated that m/IEVs contain functional mitochondria compared  
1510 to sEVs.

1511  
1512 In a pilot experiment, we determined that intravenously injected mitochondria-containing  
1513 m/IEVs showed neuroprotection in a mouse model of stroke. In our previous work, superoxide  
1514 dismutase (SOD1) protein formulated with cationic polymers (nanozymes) injected *i.v.* during  
1515 the onset of reperfusion in a rat middle cerebral artery occlusion (MCAo) model showed a  
1516 reduction in infarct volume compared to saline<sup>15, 87, 88</sup>. It should be noted that here we  
1517 administered m/IEVs two hours post-ischemia/reperfusion in an effort to simulate delayed  
1518 administration that occurs in clinical stroke scenarios and still demonstrate a ca. 40% reduction  
1519 in infarct volume compared to vehicle-injected mice. These results from this pilot study provide  
1520 proof of concept to advance our studies. It is important to note that this is the first demonstration  
1521 of *in vivo* protective effects of m/IEVs. A larger number of mice will be utilized to confirm  
1522 therapeutic efficacy in male and female mice (n=12 mice/group/sex) where, we will perform  
1523 efficacy studies in mice, we will assess infarct volumes at 72 hours, and will also analyze  
1524 behavioral recovery using neurologic deficit scoring and corner tests in treated mice.

1525  
1526 We used EVs and PEG-DET to formulate HSP27 mixtures. The isoelectric point of human  
1527 recombinant HSP27 is 5.89<sup>43</sup>, therefore, it exerts a net negative charge at physiological pH 7.4  
1528 (**Fig. 8f**). The diethyltriamine side chain of PEG-DET cationic diblock copolymer has two pKa  
1529 values associated with its molecular conformation (*gauche vs. anti*). The *gauche* conformation of  
1530 DET exerts a pKa of 9.9 that induces the formation of stable mixtures with negatively charged

1531 polynucleotides at physiological pH 7.4<sup>15, 89</sup>. We confirmed the formation of PEG-DET/HSP27  
1532 mixtures using native PAGE followed by Coomassie staining (**Fig. 8a,b**) and dynamic light  
1533 scattering (**Fig. 8e,f**). Despite the negative surface charge of EVs and the native HSP27 protein at  
1534 pH 7.4, EV/HSP27 mixtures showed about 20% interactions in native PAGE analysis (**Fig.**  
1535 **8c,d**). Haney *et al.* also reported that macrophage-derived exosomes incubated with bovine liver  
1536 catalase protein did not affect the particle diameter and dispersity indices of the sEVs/catalase  
1537 mixture<sup>90</sup>. Notably, the zeta potential of EV/HSP27 mixtures was significantly different  
1538 compared to native HSP27. The weaker interactions of HSP27 with EVs were particularly  
1539 advantageous and avoided intrusive modes of HSP27 loading (such as sonication, freeze/thaw  
1540 cycles, and saponin-mediated loading). Such intrusive modes of loading may damage the EV  
1541 membrane integrity and inversely impact the functionality of innate EV cargo, specifically, their  
1542 mitochondria. We further confirmed the m/IEV and HSP27 interactions using an  
1543 immunoprecipitation pull-down assay (**Fig. S26**). We engineered ternary mixtures of EVs with  
1544 PEG-DET/HSP27 mixtures at different w/w ratios to increase the HSP27 loading into  
1545 hCMEC/D3-derived EVs. The positively-charged PEG-DET/HSP27 mixtures (+9 mV, **Fig. 8f**)  
1546 formed electrostatic interactions with sEV and m/IEV which was confirmed by an intermediate  
1547 HSP7 band density between PEG-DET/HSP27 and sEV/HSP27 mixtures (**Fig. 8c,d**) and  
1548 increased resulting particle diameters (**Fig. 8g**). (PEG-DET/HSP27)/EV ternary mixtures showed  
1549 a near-electroneutral zeta potential (**Fig. 8h**) that may allow longer systemic circulation *in vivo*.  
1550 The inclusion of EVs in (PEG-DET/HSP27)/EV ternary mixtures may facilitate interactions with  
1551 the BBB and mediate endothelial targeting<sup>91</sup> during *in vivo* delivery while the cationic PEG-  
1552 DET can enhance the cellular uptake and facilitate the endosomal escape of HSP27<sup>15</sup>.  
1553

1554 We evaluated the prophylactic (PEG-DET/HSP27)/EVs and EV/HSP27 treatment-induced  
1555 protection of tight junction integrity by measuring the relative diffusion of hydrophilic tracers.  
1556 We used fluorescent tracers varying in molecular mass: we used 65-85 kDa TRITC-Dextran, a  
1557 large molecular weight tracer to simulate the infiltration of proteins and larger blood-borne  
1558 molecules, and a 4.4 kDa TRITC-Dextran to simulate the diffusion of small molecules during  
1559 ischemia/reperfusion.

1560

1561 We showed naïve EV, (PEG-DET/HSP27)/EV, and EV/HSP27-induced protection of tight  
1562 junction integrity against the paracellular flux of small molecules under OGD and  
1563 OGD/reperfusion conditions (**Fig. 9a-d**). (PEG-DET/HSP27)/EV ternary mixtures strengthened  
1564 the tight junctions to restrict 4.4 kD dextran entry up until 4 h of OGD exposure and as long as 4  
1565 hours of OGD/ reperfusion (**Fig. 9a-d**). Importantly, naïve EVs and their HSP27 mixtures  
1566 retarded small molecule permeability during OGD conditions and OGD/reperfusion. Notably, the  
1567 magnitude of EV/HSP27 mixture-mediated protection is considerably greater than naïve EVs  
1568 demonstrating a synergistic effect of EVs and HSP27 in increasing BEC tight junction integrity  
1569 (**Fig. 9a-d**). In addition, HBMECs treated with (PEG-DET/HSP27)/EV ternary mixtures  
1570 efficiently decreased 65-85 kD TRITC-Dextran relative diffusion for 4 h of OGD exposure  
1571 followed by immediate two hours of reperfusion compared to untreated cells, native HSP27, and  
1572 free PEG-DET-treated groups (**Fig. 10a-d**). These results indicated that (PEG-DET/HSP27)/EV-  
1573 mediated efficient transfer of HSP27 into BECs restores the tight junction integrity and may  
1574 protect the BBB during ischemia/reperfusion injury. Importantly, naïve EVs and EV/HSP27  
1575 mixtures-treated HBMECs showed efficient protection of tight junction integrity during OGD  
1576 and the first hour of ischemia/reperfusion (**Fig. 10b**).

1577

1578        Interestingly, although ternary mixtures of (PEG-DET/HSP27)/EV showed prolonged  
1579 protection of the tight junction integrity compared to native HSP27 and PEG-DET/HSP27  
1580 mixtures, the magnitude of protection is relatively lower than naïve EVs and EV/HSP27  
1581 mixtures. It is likely that the weak interactions between EV and HSP27 enable efficient EV and  
1582 HSP27 uptake and allow exerting the maximum therapeutic potential. In contrast, the stronger  
1583 electrostatic interactions in (PEG-DET/HSP27)/EV ternary mixtures may impede the release of  
1584 HSP27 resulting in a slightly lower therapeutic effect compared to EV/HSP27 mixtures.  
1585 sEV/HSP27, m/IEV/HSP/27, and m/IEV/HSP27 showed superior BEC tight junction protection  
1586 compared to PEG-DET-based groups. The possible reasons for EV/HSP27 mixture-mediated  
1587 superior BEC protection could be due to optimal binding and effective intracellular release of  
1588 HSP27 in the case of EV/HSP27 in comparison to PEG-DET/HSP27. It should be noted that  
1589 regardless of the small magnitude of decreases in relative permeabilities, EV/HSP27 mixtures  
1590 show a statistically significant effect compared to the controls. It remains to be investigated if  
1591 alternate engineering approaches, such as HSP27 protein loading into EVs using sonication <sup>92</sup>,  
1592 can further increase the magnitude of the observed effects. Our future works will optimize the  
1593 process of protein loading into EVs.

1594

## 1595 **5. Conclusion**

1596        This one-two-punch approach using EVs increased the BEC mitochondrial function due  
1597 to the innate EV mitochondrial load, and EV/HSP27 protected tight junction integrity in  
1598 ischemic BECs. Naïve m/IEVs and sEVs increased ATP levels (albeit m/IEV showed a greater  
1599 magnitude of ATP increases), mitochondrial respiration, and glycolytic capacities in the recipient

1600 BECs. For the first time, *i.v.* injected m/IEVs showed potential for neuroprotection in a mouse  
1601 model of ischemic stroke. (PEG-DET/HSP27)/EV and EV/HSP27 mixtures restored tight  
1602 junction integrity in primary human BECs by limiting the paracellular permeability of small and  
1603 large molar mass tracer molecules during ischemia/reperfusion injury. The outcomes of the  
1604 present study indicate that this approach has the potential to protect the damaged BBB *in vivo*  
1605 that in turn can ameliorate the long-term neurological damage and dysfunction in rodent models  
1606 of ischemic stroke.

1607

## 1608 **Acknowledgments**

1609 This work was supported via start-up funds for the Manickam laboratory from Duquesne  
1610 University (DU) and a 2021 Faculty Development Fund (Office of Research, DU) to the PI. We  
1611 would like to acknowledge the Neurodegenerative Undergraduate Research Experience for  
1612 funding DXD, MF and AS through a grant from the National Institute of Neurological Disorders  
1613 and Stroke (R25NS100118). The authors are thankful to Drs. Lauren O'Donnell and Manisha  
1614 Chandwani and Ms. Yashika Kamte (DU) for flow cytometry support.

1615

## 1616 **References**

- 1617 1. Murphy, D.E., de Jong, O.G., Brouwer, M., Wood, M.J., Lavieu, G., Schiffelers, R.M., and Vader,  
1618 P., *Extracellular vesicle-based therapeutics: natural versus engineered targeting and trafficking*.  
1619 *Experimental & Molecular Medicine*, 2019. **51**(3): p. 1-12.
- 1620 2. Doyle, L.M. and Wang, M.Z., *Overview of Extracellular Vesicles, Their Origin, Composition,*  
1621 *Purpose, and Methods for Exosome Isolation and Analysis*. *Cells*, 2019. **8**(7): p. 727.
- 1622 3. He, Z., Ning, N., Zhou, Q., Khoshnam, S.E., and Farzaneh, M., *Mitochondria as a therapeutic*  
1623 *target for ischemic stroke*. *Free Radical Biology and Medicine*, 2020. **146**: p. 45-58.
- 1624 4. Abdullahi, W., Tripathi, D., and Ronaldson, P.T., *Blood-brain barrier dysfunction in ischemic*  
1625 *stroke: targeting tight junctions and transporters for vascular protection*. *American journal of*  
1626 *physiology. Cell physiology*, 2018. **315**(3): p. C343-C356.



- 1627 5. Bernardo-Castro, S., Sousa, J.A., Brás, A., Cecília, C., Rodrigues, B., Almendra, L., Machado, C.,  
1628 Santo, G., Silva, F., Ferreira, L., Santana, I., and Sargento-Freitas, J., *Pathophysiology of Blood–*  
1629 *Brain Barrier Permeability Throughout the Different Stages of Ischemic Stroke and Its Implication*  
1630 *on Hemorrhagic Transformation and Recovery*. *Frontiers in Neurology*, 2020. **11**(1605).
- 1631 6. Jiang, X., Andjelkovic, A.V., Zhu, L., Yang, T., Bennett, M.V.L., Chen, J., Keep, R.F., and Shi, Y.,  
1632 *Blood-brain barrier dysfunction and recovery after ischemic stroke*. *Progress in neurobiology*,  
1633 2018. **163-164**: p. 144-171.
- 1634 7. Nian, K., Harding, I.C., Herman, I.M., and Ebong, E.E., *Blood-Brain Barrier Damage in Ischemic*  
1635 *Stroke and Its Regulation by Endothelial Mechanotransduction*. *Frontiers in Physiology*, 2020.  
1636 **11**(1681).
- 1637 8. Stamatovic, S.M., Keep, R.F., Wang, M.M., Jankovic, I., and Andjelkovic, A.V., *Caveolae-mediated*  
1638 *internalization of occludin and claudin-5 during CCL2-induced tight junction remodeling in brain*  
1639 *endothelial cells*. *J Biol Chem*, 2009. **284**(28): p. 19053-66.
- 1640 9. Shi, Y., Jiang, X., Zhang, L., Pu, H., Hu, X., Zhang, W., Cai, W., Gao, Y., Leak, R.K., Keep, R.F.,  
1641 Bennett, M.V., and Chen, J., *Endothelium-targeted overexpression of heat shock protein 27*  
1642 *ameliorates blood-brain barrier disruption after ischemic brain injury*. *Proc Natl Acad Sci U S A*,  
1643 2017. **114**(7): p. E1243-E1252.
- 1644 10. Leak, R.K., Zhang, L., Stetler, R.A., Weng, Z., Li, P., Atkins, G.B., Gao, Y., and Chen, J., *HSP27*  
1645 *protects the blood-brain barrier against ischemia-induced loss of integrity*. *CNS & neurological*  
1646 *disorders drug targets*, 2013. **12**(3): p. 325-337.
- 1647 11. During, R.L., Gibson, B.G., Li, W., Bishai, E.A., Sidhu, G.S., Landry, J., and Southwick, F.S., *Anthrax*  
1648 *lethal toxin paralyzes actin-based motility by blocking Hsp27 phosphorylation*. *Embo j*, 2007.  
1649 **26**(9): p. 2240-50.
- 1650 12. Rada, C.C., Mejia-Pena, H., Grimsey, N.J., Cordova, I.C., Olson, J., Wozniak, J.M., Gonzalez, D.J.,  
1651 Nizet, V., and Trejo, J., *Heat shock protein 27 activity is linked to endothelial barrier recovery*  
1652 *after proinflammatory GPCR-induced disruption*. *Science signaling*, 2021. **14**(698): p. eabc1044.
- 1653 13. Hirano, S., Rees, R.S., Yancy, S.L., Welsh, M.J., Remick, D.G., Yamada, T., Hata, J., and Gilmont,  
1654 R.R., *Endothelial barrier dysfunction caused by LPS correlates with phosphorylation of HSP27 in*  
1655 *vivo*. *Cell Biol Toxicol*, 2004. **20**(1): p. 1-14.
- 1656 14. Miron, T., Vancompernelle, K., Vandekerckhove, J., Wilchek, M., and Geiger, B., *A 25-kD inhibitor*  
1657 *of actin polymerization is a low molecular mass heat shock protein*. *J Cell Biol*, 1991. **114**(2): p.  
1658 255-61.
- 1659 15. Jiang, Y., Arounleut, P., Rheiner, S., Bae, Y., Kabanov, A.V., Milligan, C., and Manickam, D.S.,  
1660 *SOD1 nanozyme with reduced toxicity and MPS accumulation*. *Journal of controlled release :*  
1661 *official journal of the Controlled Release Society*, 2016. **231**: p. 38-49.
- 1662 16. Han, M., Bae, Y., Nishiyama, N., Miyata, K., Oba, M., and Kataoka, K., *Transfection study using*  
1663 *multicellular tumor spheroids for screening non-viral polymeric gene vectors with low*  
1664 *cytotoxicity and high transfection efficiencies*. *Journal of Controlled Release*, 2007. **121**(1): p. 38-  
1665 48.
- 1666 17. Xiong, M.P., Bae, Y., Fukushima, S., Forrest, M.L., Nishiyama, N., Kataoka, K., and Kwon, G.S., *pH-*  
1667 *Responsive Multi-PEGylated Dual Cationic Nanoparticles Enable Charge Modulations for Safe*  
1668 *Gene Delivery*. *ChemMedChem*, 2007. **2**(9): p. 1321-1327.
- 1669 18. Lai, T.C., Bae, Y., Yoshida, T., Kataoka, K., and Kwon, G.S., *pH-Sensitive Multi-PEGylated Block*  
1670 *Copolymer as a Bioresponsive pDNA Delivery Vector*. *Pharmaceutical Research*, 2010. **27**(11): p.  
1671 2260-2273.
- 1672 19. Dave, K.M., Zhao, W., Hoover, C., D'Souza, A., and S Manickam, D., *Extracellular Vesicles Derived*  
1673 *from a Human Brain Endothelial Cell Line Increase Cellular ATP Levels*. *AAPS PharmSciTech*, 2021.  
1674 **22**(1): p. 18.

1675 20. Théry, C., Witwer, K.W., Aikawa, E., Alcaraz, M.J., Anderson, J.D., Andriantsitohaina, R.,  
1676 Antoniou, A., Arab, T., Archer, F., Atkin-Smith, G.K., Ayre, D.C., Bach, J.M., Bachurski, D.,  
1677 Baharvand, H., Balaj, L., Baldacchino, S., Bauer, N.N., Baxter, A.A., Bebawy, M., Beckham, C.,  
1678 Bedina Zavec, A., Benmoussa, A., Berardi, A.C., Bergese, P., Bielska, E., Blenkins, C., Bobis-  
1679 Wozowicz, S., Boilard, E., Boireau, W., Bongiovanni, A., Borràs, F.E., Bosch, S., Boulanger, C.M.,  
1680 Breakefield, X., Breglio, A.M., Brennan, M., Brigstock, D.R., Brisson, A., Broekman, M.L.,  
1681 Bromberg, J.F., Bryl-Górecka, P., Buch, S., Buck, A.H., Burger, D., Busatto, S., Buschmann, D.,  
1682 Bussolati, B., Buzás, E.I., Byrd, J.B., Camussi, G., Carter, D.R., Caruso, S., Chamley, L.W., Chang,  
1683 Y.T., Chen, C., Chen, S., Cheng, L., Chin, A.R., Clayton, A., Clerici, S.P., Cocks, A., Cocucci, E.,  
1684 Coffey, R.J., Cordeiro-da-Silva, A., Couch, Y., Coumans, F.A., Coyle, B., Crescitelli, R., Criado, M.F.,  
1685 D'Souza-Schorey, C., Das, S., Datta Chaudhuri, A., de Candia, P., De Santana, E.F., De Wever, O.,  
1686 Del Portillo, H.A., Demaret, T., Deville, S., Devitt, A., Dhondt, B., Di Vizio, D., Dieterich, L.C., Dolo,  
1687 V., Dominguez Rubio, A.P., Dominici, M., Dourado, M.R., Driedonks, T.A., Duarte, F.V., Duncan,  
1688 H.M., Eichenberger, R.M., Ekström, K., El Andaloussi, S., Elie-Caille, C., Erdbrügger, U., Falcón-  
1689 Pérez, J.M., Fatima, F., Fish, J.E., Flores-Bellver, M., Försönits, A., Frelet-Barrand, A., Fricke, F.,  
1690 Fuhrmann, G., Gabriëlsson, S., Gámez-Valero, A., Gardiner, C., Gärtner, K., Gaudin, R., Gho, Y.S.,  
1691 Giebel, B., Gilbert, C., Gimona, M., Giusti, I., Goberdhan, D.C., Görgens, A., Gorski, S.M.,  
1692 Greening, D.W., Gross, J.C., Gualerzi, A., Gupta, G.N., Gustafson, D., Handberg, A., Haraszti, R.A.,  
1693 Harrison, P., Hegyesi, H., Hendrix, A., Hill, A.F., Hochberg, F.H., Hoffmann, K.F., Holder, B.,  
1694 Holthofer, H., Hosseinkhani, B., Hu, G., Huang, Y., Huber, V., Hunt, S., Ibrahim, A.G., Ikezu, T.,  
1695 Inal, J.M., Isin, M., Ivanova, A., Jackson, H.K., Jacobsen, S., Jay, S.M., Jayachandran, M., Jenster,  
1696 G., Jiang, L., Johnson, S.M., Jones, J.C., Jong, A., Jovanovic-Talisman, T., Jung, S., Kalluri, R., Kano,  
1697 S.I., Kaur, S., Kawamura, Y., Keller, E.T., Khamari, D., Khomyakova, E., Khvorova, A., Kierulf, P.,  
1698 Kim, K.P., Kislinger, T., Klingeborn, M., Klinke, D.J., 2nd, Kornek, M., Kosanović, M.M., Kovács Á,  
1699 F., Krämer-Albers, E.M., Krasemann, S., Krause, M., Kurochkin, I.V., Kusuma, G.D., Kuypers, S.,  
1700 Laitinen, S., Langevin, S.M., Languino, L.R., Lannigan, J., Lässer, C., Laurent, L.C., Lavieu, G.,  
1701 Lázaro-Ibáñez, E., Le Lay, S., Lee, M.S., Lee, Y.X.F., Lemos, D.S., Lenassi, M., Leszczynska, A., Li,  
1702 I.T., Liao, K., Libregts, S.F., Ligeti, E., Lim, R., Lim, S.K., Linē, A., Linnemannstöns, K., Llorente, A.,  
1703 Lombard, C.A., Lorenowicz, M.J., Lörincz Á, M., Lötvall, J., Lovett, J., Lowry, M.C., Loyer, X., Lu,  
1704 Q., Lukomska, B., Lunavat, T.R., Maas, S.L., Malhi, H., Marcilla, A., Mariani, J., Mariscal, J.,  
1705 Martens-Uzunova, E.S., Martin-Jaular, L., Martinez, M.C., Martins, V.R., Mathieu, M.,  
1706 Mathivanan, S., Maugeri, M., McGinnis, L.K., McVey, M.J., Meckes, D.G., Jr., Meehan, K.L.,  
1707 Mertens, I., Minciacchi, V.R., Möller, A., Møller Jørgensen, M., Morales-Kastresana, A.,  
1708 Morhayim, J., Mullier, F., Muraca, M., Musante, L., Mussack, V., Muth, D.C., Myburgh, K.H.,  
1709 Najrana, T., Nawaz, M., Nazarenko, I., Nejsun, P., Neri, C., Neri, T., Nieuwland, R., Nimrichter, L.,  
1710 Nolan, J.P., Nolte-<sup>t</sup> Hoen, E.N., Noren Hooten, N., O'Driscoll, L., O'Grady, T., O'Loghlen, A.,  
1711 Ochiya, T., Olivier, M., Ortiz, A., Ortiz, L.A., Osteikoetxea, X., Østergaard, O., Ostrowski, M., Park,  
1712 J., Pegtel, D.M., Peinado, H., Perut, F., Pfaffl, M.W., Phinney, D.G., Pieters, B.C., Pink, R.C.,  
1713 Pisetsky, D.S., Pogge von Strandmann, E., Polakovicova, I., Poon, I.K., Powell, B.H., Prada, I.,  
1714 Pulliam, L., Quesenberry, P., Radeghieri, A., Raffai, R.L., Raimondo, S., Rak, J., Ramirez, M.I.,  
1715 Raposo, G., Rayyan, M.S., Regev-Rudzki, N., Ricklefs, F.L., Robbins, P.D., Roberts, D.D., Rodrigues,  
1716 S.C., Rohde, E., Rome, S., Rouschop, K.M., Rughetti, A., Russell, A.E., Saá, P., Sahoo, S., Salas-  
1717 Huenuleo, E., Sánchez, C., Saugstad, J.A., Saul, M.J., Schiffelers, R.M., Schneider, R., Schøyen,  
1718 T.H., Scott, A., Shahaj, E., Sharma, S., Shatnyeva, O., Shekari, F., Shelke, G.V., Shetty, A.K., Shiba,  
1719 K., Siljander, P.R., Silva, A.M., Skowronek, A., Snyder, O.L., 2nd, Soares, R.P., Sódar, B.W.,  
1720 Soekmadji, C., Sotillo, J., Stahl, P.D., Stoorvogel, W., Stott, S.L., Strasser, E.F., Swift, S., Tahara, H.,  
1721 Tewari, M., Timms, K., Tiwari, S., Tixeira, R., Tkach, M., Toh, W.S., Tomasini, R., Torrecilhas, A.C.,  
1722 Tosar, J.P., Toxavidis, V., Urbanelli, L., Vader, P., van Balkom, B.W., van der Grein, S.G., Van

- 1723 Deun, J., van Herwijnen, M.J., Van Keuren-Jensen, K., van Niel, G., van Royen, M.E., van Wijnen,  
1724 A.J., Vasconcelos, M.H., Vechetti, I.J., Jr., Veit, T.D., Vella, L.J., Velot, É., Verweij, F.J., Vestad, B.,  
1725 Viñas, J.L., Visnovitz, T., Vukman, K.V., Wahlgren, J., Watson, D.C., Wauben, M.H., Weaver, A.,  
1726 Webber, J.P., Weber, V., Wehman, A.M., Weiss, D.J., Welsh, J.A., Wendt, S., Wheelock, A.M.,  
1727 Wiener, Z., Witte, L., Wolfram, J., Xagorari, A., Xander, P., Xu, J., Yan, X., Yáñez-Mó, M., Yin, H.,  
1728 Yuana, Y., Zappulli, V., Zarubova, J., Žekas, V., Zhang, J.Y., Zhao, Z., Zheng, L., Zheutlin, A.R.,  
1729 Zickler, A.M., Zimmermann, P., Zivkovic, A.M., Zocco, D. and Zuba-Surma, E.K., *Minimal*  
1730 *information for studies of extracellular vesicles 2018 (MISEV2018): a position statement of the*  
1731 *International Society for Extracellular Vesicles and update of the MISEV2014 guidelines.* J  
1732 Extracell Vesicles, 2018. **7**(1): p. 1535750.
- 1733 21. Chen, T.H., Bae, Y., Furgeson, D.Y., and Kwon, G.S., *Biodegradable hybrid recombinant block*  
1734 *copolymers for non-viral gene transfection.* Int J Pharm, 2012. **427**(1): p. 105-12.
- 1735 22. Kanayama, N., Fukushima, S., Nishiyama, N., Itaka, K., Jang, W.-D., Miyata, K., Yamasaki, Y.,  
1736 Chung, U.-i., and Kataoka, K., *A PEG-Based Biocompatible Block Cationomer with High Buffering*  
1737 *Capacity for the Construction of Polyplex Micelles Showing Efficient Gene Transfer toward*  
1738 *Primary Cells.* ChemMedChem, 2006. **1**(4): p. 439-444.
- 1739 23. D'Souza, A., Burch, A., Dave, K.M., Sreeram, A., Reynolds, M.J., Dobbins, D.X., Kamte, Y.S., Zhao,  
1740 W., Sabatelle, C., Joy, G.M., Soman, V., Chandran, U.R., Shiva, S.S., Quillinan, N., Herson, P.S.,  
1741 and Manickam, D.S., *Microvesicles transfer mitochondria and increase mitochondrial function in*  
1742 *brain endothelial cells.* Journal of controlled release : official journal of the Controlled Release  
1743 Society, 2021. **338**: p. 505-526.
- 1744 24. Donker, R.B., Mouillet, J.F., Chu, T., Hubel, C.A., Stolz, D.B., Morelli, A.E., and Sadovsky, Y., *The*  
1745 *expression profile of C19MC microRNAs in primary human trophoblast cells and exosomes.* Mol  
1746 Hum Reprod, 2012. **18**(8): p. 417-24.
- 1747 25. Hough, K.P., Trevor, J.L., Strenkowski, J.G., Wang, Y., Chacko, B.K., Tousif, S., Chanda, D., Steele,  
1748 C., Antony, V.B., Dokland, T., Ouyang, X., Zhang, J., Duncan, S.R., Thannickal, V.J., Darley-Usmar,  
1749 V.M., and Deshane, J.S., *Exosomal transfer of mitochondria from airway myeloid-derived*  
1750 *regulatory cells to T cells.* Redox Biol, 2018. **18**: p. 54-64.
- 1751 26. Dave, K.M., Ali, L., and Manickam, D.S., *Characterization of the SIM-A9 cell line as a model of*  
1752 *activated microglia in the context of neuropathic pain.* PLoS One, 2020. **15**(4): p. e0231597.
- 1753 27. Dave, K.M., Han, L., Jackson, M.A., Kadlecik, L., Duvall, C.L., and D, S.M., *DNA Polyplexes of a*  
1754 *Phosphorylcholine-Based Zwitterionic Polymer for Gene Delivery.* Pharm Res, 2020. **37**(9): p. 176.
- 1755 28. Dai, X., Chen, J., Xu, F., Zhao, J., Cai, W., Sun, Z., Hitchens, T.K., Foley, L.M., Leak, R.K., Chen, J.,  
1756 and Hu, X., *TGFalpha preserves oligodendrocyte lineage cells and improves white matter*  
1757 *integrity after cerebral ischemia.* J Cereb Blood Flow Metab, 2020. **40**(3): p. 639-655.
- 1758 29. Cardenes, N., Corey, C., Geary, L., Jain, S., Zharikov, S., Barge, S., Novelli, E.M., and Shiva, S.,  
1759 *Platelet bioenergetic screen in sickle cell patients reveals mitochondrial complex V inhibition,*  
1760 *which contributes to platelet activation.* Blood, 2014. **123**(18): p. 2864-72.
- 1761 30. McCullough, L.D., Roy-O'Reilly, M., Lai, Y.-J., Patrizz, A., Xu, Y., Lee, J., Holmes, A., Kraushaar,  
1762 D.C., Chauhan, A., Sansing, L.H., Stonestreet, B.S., Zhu, L., Kofler, J., Lim, Y.-P., and Venna, V.R.,  
1763 *Exogenous inter-α inhibitor proteins prevent cell death and improve ischemic stroke outcomes in*  
1764 *mice.* The Journal of Clinical Investigation, 2021. **131**(17).
- 1765 31. Liu, F., Yuan, R., Benashski, S.E., and McCullough, L.D., *Changes in Experimental Stroke Outcome*  
1766 *across the Life Span.* Journal of Cerebral Blood Flow & Metabolism, 2009. **29**(4): p. 792-802.
- 1767 32. Raposo, G. and Stoorvogel, W., *Extracellular vesicles: exosomes, microvesicles, and friends.* J Cell  
1768 Biol, 2013. **200**(4): p. 373-83.
- 1769 33. Ikeda, G., Santoso, M.R., Tada, Y., Li, A.M., Vaskova, E., Jung, J.-H., O'Brien, C., Egan, E., Ye, J.,  
1770 and Yang, P.C., *Mitochondria-Rich Extracellular Vesicles From Autologous Stem Cell-Derived*

- 1771 *Cardiomyocytes Restore Energetics of Ischemic Myocardium*. Journal of the American College of  
1772 Cardiology, 2021. **77**(8): p. 1073-1088.
- 1773 34. Phinney, D.G., Di Giuseppe, M., Njah, J., Sala, E., Shiva, S., St Croix, C.M., Stolz, D.B., Watkins,  
1774 S.C., Di, Y.P., Leikauf, G.D., Kolls, J., Riches, D.W.H., Deiuliis, G., Kaminski, N., Boregowda, S.V.,  
1775 McKenna, D.H., and Ortiz, L.A., *Mesenchymal stem cells use extracellular vesicles to outsource*  
1776 *mitophagy and shuttle microRNAs*. Nature Communications, 2015. **6**(1): p. 8472.
- 1777 35. Hayakawa, K., Chan, S.J., Mandeville, E.T., Park, J.H., Bruzzese, M., Montaner, J., Arai, K., Rosell,  
1778 A., and Lo, E.H., *Protective Effects of Endothelial Progenitor Cell-Derived Extracellular*  
1779 *Mitochondria in Brain Endothelium*. Stem cells, 2018. **36**(9): p. 1404-1410.
- 1780 36. Hayakawa, K., Esposito, E., Wang, X., Terasaki, Y., Liu, Y., Xing, C., Ji, X., and Lo, E.H., *Transfer of*  
1781 *mitochondria from astrocytes to neurons after stroke*. Nature, 2016. **535**(7613): p. 551-555.
- 1782 37. *CellLight™ Mitochondria-GFP, BacMam 2.0 (ThermoFisher website)*.
- 1783 38. Phinney, D.G., Di Giuseppe, M., Njah, J., Sala, E., Shiva, S., St Croix, C.M., Stolz, D.B., Watkins,  
1784 S.C., Di, Y.P., Leikauf, G.D., Kolls, J., Riches, D.W.H., Deiuliis, G., Kaminski, N., Boregowda, S.V.,  
1785 McKenna, D.H., and Ortiz, L.A., *Mesenchymal stem cells use extracellular vesicles to outsource*  
1786 *mitophagy and shuttle microRNAs*. Nature communications, 2015. **6**: p. 8472.
- 1787 39. <https://www.agilent.com/en/products/cell-analysis/how-seahorse-xf-analyzers-work>.
- 1788 40. Doeppner, T.R., Herz, J., Görgens, A., Schlechter, J., Ludwig, A.K., Radtke, S., de Miroshedji, K.,  
1789 Horn, P.A., Giebel, B., and Hermann, D.M., *Extracellular Vesicles Improve Post-Stroke*  
1790 *Neuroregeneration and Prevent Postischemic Immunosuppression*. Stem Cells Transl Med, 2015.  
1791 **4**(10): p. 1131-43.
- 1792 41. Zheng, X., Zhang, L., Kuang, Y., Venkataramani, V., Jin, F., Hein, K., Zafeiriou, M.P., Lenz, C.,  
1793 Moebius, W., Kilic, E., Hermann, D.M., Weber, M.S., Urlaub, H., Zimmermann, W.H., Bähr, M.,  
1794 and Doeppner, T.R., *Extracellular Vesicles Derived from Neural Progenitor Cells--a Preclinical*  
1795 *Evaluation for Stroke Treatment in Mice*. Transl Stroke Res, 2021. **12**(1): p. 185-203.
- 1796 42. Zhang, L., Wei, W., Ai, X., Kilic, E., Hermann, D.M., Venkataramani, V., Bähr, M., and Doeppner,  
1797 T.R., *Extracellular vesicles from hypoxia-preconditioned microglia promote angiogenesis and*  
1798 *repress apoptosis in stroke mice via the TGF- $\beta$ /Smad2/3 pathway*. Cell Death & Disease, 2021.  
1799 **12**(11): p. 1068.
- 1800 43. <http://protcalc.sourceforge.net/>.
- 1801 44. Doll, D.N., Hu, H., Sun, J., Lewis, S.E., Simpkins, J.W., and Ren, X., *Mitochondrial crisis in*  
1802 *cerebrovascular endothelial cells opens the blood-brain barrier*. Stroke, 2015. **46**(6): p. 1681-  
1803 1689.
- 1804 45. Shi, Y., Zhang, L., Pu, H., Mao, L., Hu, X., Jiang, X., Xu, N., Stetler, R.A., Zhang, F., Liu, X., Leak,  
1805 R.K., Keep, R.F., Ji, X., and Chen, J., *Rapid endothelial cytoskeletal reorganization enables early*  
1806 *blood-brain barrier disruption and long-term ischaemic reperfusion brain injury*. Nature  
1807 communications, 2016. **7**: p. 10523.
- 1808 46. Sweeney, M.D., Zhao, Z., Montagne, A., Nelson, A.R., and Zlokovic, B.V., *Blood-Brain Barrier:*  
1809 *From Physiology to Disease and Back*. Physiological Reviews, 2019. **99**(1): p. 21-78.
- 1810 47. del Zoppo, G.J., *Inflammation and the neurovascular unit in the setting of focal cerebral*  
1811 *ischemia*. Neuroscience, 2009. **158**(3): p. 972-982.
- 1812 48. Knowland, D., Arac, A., Sekiguchi, K.J., Hsu, M., Lutz, S.E., Perrino, J., Steinberg, G.K., Barres, B.A.,  
1813 Nimmerjahn, A., and Agalliu, D., *Stepwise recruitment of transcellular and paracellular pathways*  
1814 *underlies blood-brain barrier breakdown in stroke*. Neuron, 2014. **82**(3): p. 603-17.
- 1815 49. Oldendorf, W.H., Cornford, M.E., and Brown, W.J., *The large apparent work capability of the*  
1816 *blood-brain barrier: a study of the mitochondrial content of capillary endothelial cells in brain*  
1817 *and other tissues of the rat*. Ann Neurol, 1977. **1**(5): p. 409-17.

- 1818 50. Schiera, G., Di Liegro, C.M., and Di Liegro, I., *Extracellular Membrane Vesicles as Vehicles for*  
1819 *Brain Cell-to-Cell Interactions in Physiological as well as Pathological Conditions*. BioMed  
1820 Research International, 2015. **2015**: p. 152926.
- 1821 51. Andras, I.E. and Toborek, M., *Extracellular vesicles of the blood-brain barrier*. Tissue Barriers,  
1822 2016. **4**(1): p. e1131804.
- 1823 52. Yang, T., Martin, P., Fogarty, B., Brown, A., Schurman, K., Phipps, R., Yin, V.P., Lockman, P., and  
1824 Bai, S., *Exosome delivered anticancer drugs across the blood-brain barrier for brain cancer*  
1825 *therapy in Danio rerio*. Pharm Res, 2015. **32**(6): p. 2003-14.
- 1826 53. Yang, D., Zhang, W., Zhang, H., Zhang, F., Chen, L., Ma, L., Larcher, L.M., Chen, S., Liu, N., Zhao,  
1827 Q., Tran, P.H.L., Chen, C., Veedu, R.N., and Wang, T., *Progress, opportunity, and perspective on*  
1828 *exosome isolation - efforts for efficient exosome-based theranostics*. Theranostics, 2020. **10**(8):  
1829 p. 3684-3707.
- 1830 54. Dozio, V. and Sanchez, J.C., *Characterisation of extracellular vesicle-subsets derived from brain*  
1831 *endothelial cells and analysis of their protein cargo modulation after TNF exposure*. J Extracell  
1832 Vesicles, 2017. **6**(1): p. 1302705.
- 1833 55. Kanada, M., Bachmann, M.H., Hardy, J.W., Frimannson, D.O., Bronsart, L., Wang, A., Sylvester,  
1834 M.D., Schmidt, T.L., Kaspar, R.L., Butte, M.J., Matin, A.C., and Contag, C.H., *Differential fates of*  
1835 *biomolecules delivered to target cells via extracellular vesicles*. Proceedings of the National  
1836 Academy of Sciences, 2015. **112**(12): p. E1433-E1442.
- 1837 56. Kim, A., Ng, W.B., Bernt, W., and Cho, N.-J., *Validation of Size Estimation of Nanoparticle*  
1838 *Tracking Analysis on Polydisperse Macromolecule Assembly*. Scientific Reports, 2019. **9**(1): p.  
1839 2639.
- 1840 57. Konoshenko, M.Y., Lekchnov, E.A., Vlassov, A.V., and Laktionov, P.P., *Isolation of Extracellular*  
1841 *Vesicles: General Methodologies and Latest Trends*. Biomed Res Int, 2018. **2018**: p. 8545347.
- 1842 58. El Andaloussi, S., Mäger, I., Breakefield, X.O., and Wood, M.J.A., *Extracellular vesicles: biology*  
1843 *and emerging therapeutic opportunities*. Nature Reviews Drug Discovery, 2013. **12**(5): p. 347-  
1844 357.
- 1845 59. Jeyaram, A. and Jay, S.M., *Preservation and Storage Stability of Extracellular Vesicles for*  
1846 *Therapeutic Applications*. Aaps j, 2017. **20**(1): p. 1.
- 1847 60. Ge, Q., Zhou, Y., Lu, J., Bai, Y., Xie, X., and Lu, Z., *miRNA in Plasma Exosome is Stable under*  
1848 *Different Storage Conditions*. Molecules, 2014. **19**(2): p. 1568-1575.
- 1849 61. Witwer, K.W., Buzás, E.I., Bemis, L.T., Bora, A., Lässer, C., Lötval, J., Nolte-’t Hoen, E.N., Piper,  
1850 M.G., Sivaraman, S., Skog, J., Théry, C., Wauben, M.H., and Hochberg, F., *Standardization of*  
1851 *sample collection, isolation and analysis methods in extracellular vesicle research*. Journal of  
1852 Extracellular Vesicles, 2013. **2**(1): p. 20360.
- 1853 62. Spees, J.L., Olson, S.D., Whitney, M.J., and Prockop, D.J., *Mitochondrial transfer between cells*  
1854 *can rescue aerobic respiration*. Proceedings of the National Academy of Sciences, 2006. **103**(5):  
1855 p. 1283-1288.
- 1856 63. Islam, M.N., Das, S.R., Emin, M.T., Wei, M., Sun, L., Westphalen, K., Rowlands, D.J., Quadri, S.K.,  
1857 Bhattacharya, S., and Bhattacharya, J., *Mitochondrial transfer from bone-marrow-derived*  
1858 *stromal cells to pulmonary alveoli protects against acute lung injury*. Nature Medicine, 2012.  
1859 **18**(5): p. 759-765.
- 1860 64. Sinha, P., Islam, M.N., Bhattacharya, S., and Bhattacharya, J., *Intercellular mitochondrial transfer:*  
1861 *bioenergetic crosstalk between cells*. Current Opinion in Genetics & Development, 2016. **38**: p.  
1862 97-101.
- 1863 65. Gao, L., Zhang, Z., Lu, J., and Pei, G., *Mitochondria Are Dynamically Transferring Between Human*  
1864 *Neural Cells and Alexander Disease-Associated GFAP Mutations Impair the Astrocytic Transfer*.  
1865 Front Cell Neurosci, 2019. **13**(316): p. 316.

- 1866 66. Puhm, F., Afonyushkin, T., Resch, U., Obermayer, G., Rohde, M., Penz, T., Schuster, M., Wagner,  
1867 G., Rendeiro, A.F., Melki, I., Kaun, C., Wojta, J., Bock, C., Jilma, B., Mackman, N., Boilard, E., and  
1868 Binder, C.J., *Mitochondria Are a Subset of Extracellular Vesicles Released by Activated*  
1869 *Monocytes and Induce Type I IFN and TNF Responses in Endothelial Cells*. *Circulation Research*,  
1870 2019. **125**(1): p. 43-52.
- 1871 67. van der Vlist, M., Raouf, R., Willemsen, H., Prado, J., Versteeg, S., Martin Gil, C., Vos, M.,  
1872 Lokhorst, R.E., Pasterkamp, R.J., Kojima, T., Karasuyama, H., Khoury-Hanold, W., Meyaard, L.,  
1873 and Eijkelkamp, N., *Macrophages transfer mitochondria to sensory neurons to resolve*  
1874 *inflammatory pain*. *Neuron*, 2022. **110**(4): p. 613-626.e9.
- 1875 68. Guescini, M., Genedani, S., Stocchi, V., and Agnati, L.F., *Astrocytes and Glioblastoma cells release*  
1876 *exosomes carrying mtDNA*. *Journal of Neural Transmission*, 2009. **117**(1): p. 1.
- 1877 69. Goldberg, J., Currais, A., Prior, M., Fischer, W., Chiruta, C., Ratliff, E., Daugherty, D., Dargusch, R.,  
1878 Finley, K., Esparza-Moltó, P.B., Cuezva, J.M., Maher, P., Petrascheck, M., and Schubert, D., *The*  
1879 *mitochondrial ATP synthase is a shared drug target for aging and dementia*. *Aging cell*, 2018.  
1880 **17**(2): p. e12715.
- 1881 70. Jonckheere, A.I., Smeitink, J.A.M., and Rodenburg, R.J.T., *Mitochondrial ATP synthase:*  
1882 *architecture, function and pathology*. *Journal of Inherited Metabolic Disease*, 2012. **35**(2): p.  
1883 211-225.
- 1884 71. Pasquale D'Acunzo, o.P.-G., Yohan Kim, Tal Hargash, Chelsea Miller, Melissa J. Alldred, Hediye  
1885 Erdjument-Bromage, Sai C. Penikalapati, Monika Pawlik, Mitsuo Saito, Mariko Saito, Stephen D.  
1886 Ginsberg, Thomas A. Neubert, Chris N. Goulbourne, Efrat Levy, *Mitovesicles are a novel*  
1887 *population of extracellular vesicles of mitochondrial origin altered in Down syndrome*. *Scientific*  
1888 *Reports*, 2021. **7**: p. eabe5085.
- 1889 72. Sansone, P., Savini, C., Kurelac, I., Chang, Q., Amato, L.B., Strillacci, A., Stepanova, A., Iommarini,  
1890 L., Mastroleo, C., Daly, L., Galkin, A., Thakur, B.K., Soplop, N., Uryu, K., Hoshino, A., Norton, L.,  
1891 Bonafé, M., Cricca, M., Gasparre, G., Lyden, D., and Bromberg, J., *Packaging and transfer of*  
1892 *mitochondrial DNA via exosomes regulate escape from dormancy in hormonal therapy-resistant*  
1893 *breast cancer*. *Proceedings of the National Academy of Sciences*, 2017. **114**(43): p. E9066-E9075.
- 1894 73. Yamamoto, H., Itoh, N., Kawano, S., Yatsukawa, Y.-i., Momose, T., Makio, T., Matsunaga, M.,  
1895 Yokota, M., Esaki, M., Shodai, T., Kohda, D., Hobbs, A.E.A., Jensen, R.E., and Endo, T., *Dual role of*  
1896 *the receptor Tom20 in specificity and efficiency of protein import into mitochondria*. *Proceedings*  
1897 *of the National Academy of Sciences of the United States of America*, 2011. **108**(1): p. 91-96.
- 1898 74. Dutra Silva, J., Su, Y., Calfee, C.S., Delucchi, K.L., Weiss, D., McAuley, D.F., O'Kane, C., and  
1899 Krasnodembskaya, A.D., *Mesenchymal stromal cell extracellular vesicles rescue mitochondrial*  
1900 *dysfunction and improve barrier integrity in clinically relevant models of ARDS*. *Eur Respir J*,  
1901 2021. **58**(1).
- 1902 75. Andreu, Z. and Yáñez-Mó, M., *Tetraspanins in extracellular vesicle formation and function*. *Front*  
1903 *Immunol*, 2014. **5**: p. 442.
- 1904 76. Xiao, B., Deng, X., Zhou, W., and Tan, E.K., *Flow Cytometry-Based Assessment of Mitophagy*  
1905 *Using MitoTracker*. *Front Cell Neurosci*, 2016. **10**(76): p. 76.
- 1906 77. Chazotte, B., *Labeling mitochondria with MitoTracker dyes*. *Cold Spring Harbor protocols*, 2011.  
1907 **2011**(8): p. 990-2.
- 1908 78. Guo, Y., Chi, X., Wang, Y., Heng, B.C., Wei, Y., Zhang, X., Zhao, H., Yin, Y., and Deng, X.,  
1909 *Mitochondria transfer enhances proliferation, migration, and osteogenic differentiation of bone*  
1910 *marrow mesenchymal stem cell and promotes bone defect healing*. *Stem Cell Res Ther*, 2020.  
1911 **11**(1): p. 245.
- 1912 79. Zhang, J., Tan, Z., and Tran, N.D., *Chemical hypoxia-ischemia induces apoptosis in*  
1913 *cerebromicrovascular endothelial cells*. *Brain Res*, 2000. **877**(2): p. 134-40.

- 1914 80. Andjelkovic, A.V., Xiang, J., Stamatovic, S.M., Hua, Y., Xi, G., Wang, M.M., and Keep, R.F.,  
1915 *Endothelial Targets in Stroke*. Arteriosclerosis, Thrombosis, and Vascular Biology, 2019. **39**(11):  
1916 p. 2240-2247.
- 1917 81. Yang, D.I., Lin, T.N., Yin, K.J., Hu, C.J., Chen, S.D., Xu, J., and Hsu, C.Y., *Cerebral Endothelial Cell*  
1918 *Reaction to Ischemic Insults*, in *Handbook of Neurochemistry and Molecular Neurobiology: Acute*  
1919 *Ischemic Injury and Repair in the Nervous System*, A. Lajtha and P.H. Chan, Editors. 2007,  
1920 Springer US: Boston, MA. p. 165-183.
- 1921 82. Keep R.F., A.A.V., Stamatovic S.M., Shakui P., Ennis S.R., *Ischemia-induced endothelial cell*  
1922 *dysfunction*. Intracranial Pressure and Brain Monitoring XII, 2005. **95**.
- 1923 83. Park, H.-H., Han, M.-H., Choi, H., Lee, Y.J., Kim, J.M., Cheong, J.H., Ryu, J.I., Lee, K.-Y., and Koh, S.-  
1924 H., *Mitochondria damaged by Oxygen Glucose Deprivation can be Restored through Activation*  
1925 *of the PI3K/Akt Pathway and Inhibition of Calcium Influx by Amlodipine Camsylate*. Scientific  
1926 Reports, 2019. **9**(1): p. 15717.
- 1927 84. Liao, L.-X., Zhao, M.-B., Dong, X., Jiang, Y., Zeng, K.-W., and Tu, P.-F., *TDB protects vascular*  
1928 *endothelial cells against oxygen-glucose deprivation/reperfusion-induced injury by targeting*  
1929 *miR-34a to increase Bcl-2 expression*. Scientific Reports, 2016. **6**(1): p. 37959.
- 1930 85. Smolina, N., Bruton, J., Kostareva, A., and Sejersen, T., *Assaying Mitochondrial Respiration as an*  
1931 *Indicator of Cellular Metabolism and Fitness*. Methods Mol Biol, 2017. **1601**: p. 79-87.
- 1932 86. Rose, S., Frye, R.E., Slattery, J., Wynne, R., Tippett, M., Pavliv, O., Melnyk, S., and James, S.J.,  
1933 *Oxidative stress induces mitochondrial dysfunction in a subset of autism lymphoblastoid cell lines*  
1934 *in a well-matched case control cohort*. PloS one, 2014. **9**(1): p. e85436.
- 1935 87. Manickam, D.S., Brynskikh, A.M., Kopanic, J.L., Sorgen, P.L., Klyachko, N.L., Batrakova, E.V.,  
1936 Bronich, T.K., and Kabanov, A.V., *Well-defined cross-linked antioxidant nanozymes for treatment*  
1937 *of ischemic brain injury*. J Control Release, 2012. **162**(3): p. 636-45.
- 1938 88. Jiang, Y., Brynskikh, A.M., D, S.M., and Kabanov, A.V., *SOD1 nanozyme salvages ischemic brain*  
1939 *by locally protecting cerebral vasculature*. Journal of controlled release : official journal of the  
1940 Controlled Release Society, 2015. **213**: p. 36-44.
- 1941 89. Miyata, K., Oba, M., Nakanishi, M., Fukushima, S., Yamasaki, Y., Koyama, H., Nishiyama, N., and  
1942 Kataoka, K., *Polyplexes from Poly(aspartamide) Bearing 1,2-Diaminoethane Side Chains Induce*  
1943 *pH-Selective, Endosomal Membrane Destabilization with Amplified Transfection and Negligible*  
1944 *Cytotoxicity*. Journal of the American Chemical Society, 2008. **130**(48): p. 16287-16294.
- 1945 90. Haney, M.J., Klyachko, N.L., Zhao, Y., Gupta, R., Plotnikova, E.G., He, Z., Patel, T., Piroyan, A.,  
1946 Sokolsky, M., Kabanov, A.V., and Batrakova, E.V., *Exosomes as drug delivery vehicles for*  
1947 *Parkinson's disease therapy*. Journal of controlled release : official journal of the Controlled  
1948 Release Society, 2015. **207**: p. 18-30.
- 1949 91. Yuan, D., Zhao, Y., Banks, W.A., Bullock, K.M., Haney, M., Batrakova, E., and Kabanov, A.V.,  
1950 *Macrophage exosomes as natural nanocarriers for protein delivery to inflamed brain*.  
1951 Biomaterials, 2017. **142**: p. 1-12.
- 1952 92. Yerneni, S.S., Adamik, J., Weiss, L.E., and Campbell, P.G., *Cell trafficking and regulation of*  
1953 *osteoblastogenesis by extracellular vesicle associated bone morphogenetic protein 2*. Journal of  
1954 Extracellular Vesicles, 2021. **10**(12): p. e12155.

1955
