1     **Extracellular Vesicles Deliver Mitochondria and HSP27 Protein to**  
2                                   **Protect the Blood-Brain Barrier**

3     Kandarp M. Dave<sup>1</sup>, Michael John Reynolds<sup>2</sup>, Donna B. Stolz<sup>3</sup>, Riyan Babidhan<sup>1</sup>,  
4     Duncan X. Dobbins<sup>1</sup>, Hannah Yankello<sup>4</sup>, Rohan Reddy<sup>1</sup>, Younsoo Bae<sup>5</sup>, Sruti S.  
5     Shiva<sup>2,6</sup>, Devika S Manickam<sup>1</sup>

6     <sup>1</sup>Graduate School of Pharmaceutical Sciences, Duquesne University, Pittsburgh, PA

7     <sup>2</sup>Pittsburgh Heart Lung Blood Vascular Institute, University of Pittsburgh Medical School,  
8     Pittsburgh, PA

9     <sup>3</sup>Center for Biologic Imaging, University of Pittsburgh Medical School, Pittsburgh, PA

10    <sup>4</sup>Departments of Chemical and Biomedical Engineering, Carnegie Mellon University, Pittsburgh,  
11    PA

12    <sup>5</sup>Department of Pharmaceutical Sciences, College of Pharmacy, The University of Kentucky,  
13    Lexington, KY

14    <sup>6</sup>Department of Pharmacology & Chemical Biology, University of Pittsburgh Medical School,  
15    Pittsburgh, PA

16

17    †**Corresponding author:**

18    Devika S Manickam, Ph.D.

19    600 Forbes Avenue, 453 Mellon Hall

20    Pittsburgh, PA 15282.

21    Email: [soundaramanickd@duq.edu](mailto:soundaramanickd@duq.edu), Twitter: [@manickam\\_lab](https://twitter.com/manickam_lab)

22    Phone: +1 (412) 396-4722, Fax +1 (412) 396-2501

## 23 **Highlights**

- 24       ➤ Exosomes and microvesicles (EVs) can be engineered for co-delivery of bio-actives
- 25       ➤ Microvesicles (MV) but not exosomes contain functional mitochondria
- 26       ➤ MV mitochondria fused with the mitochondria in recipient brain endothelial cells
- 27       ➤ MVs increase mitochondrial function while EVs increase cellular ATP levels
- 28       ➤ EV-mediated HSP27 delivery decreased dextran permeability in brain endothelial cells

29

30

31

32 **Abstract**

33

34 Ischemic stroke causes brain endothelial cell death and damages tight junction integrity of the  
35 blood-brain barrier (BBB). We engineered endothelial cell-derived extracellular vesicles (EVs)  
36 for the delivery of exogenous heat shock protein 27 (HSP27) and harnessed the innate EV  
37 mitochondrial load as a one, two-punch strategy to increase brain endothelial cell survival (via  
38 mitochondrial delivery) and preserve their tight junction integrity (via HSP27 delivery). We  
39 demonstrated that endothelial microvesicles but not exosomes transferred their mitochondrial  
40 load that subsequently underwent fusion with the mitochondrial network of the recipient primary  
41 human brain endothelial cells. This mitochondrial transfer increased the relative ATP levels and  
42 mitochondrial function in the recipient endothelial cells. EV-mediated HSP27 delivery to  
43 primary human brain endothelial cells decreased the paracellular permeability of small and large  
44 molecular mass fluorescent tracers in an *in vitro* model of ischemia/reperfusion injury. This one,  
45 two-punch approach to increase the metabolic function and structural integrity of brain  
46 endothelial cells is a promising strategy for BBB protection and prevention of long-term  
47 neurological dysfunction post-ischemic stroke.

## 48 Graphical Abstract

### One, two-punch: Mitochondria and HSP27 delivery via EVs increase BBB metabolic function and structural integrity

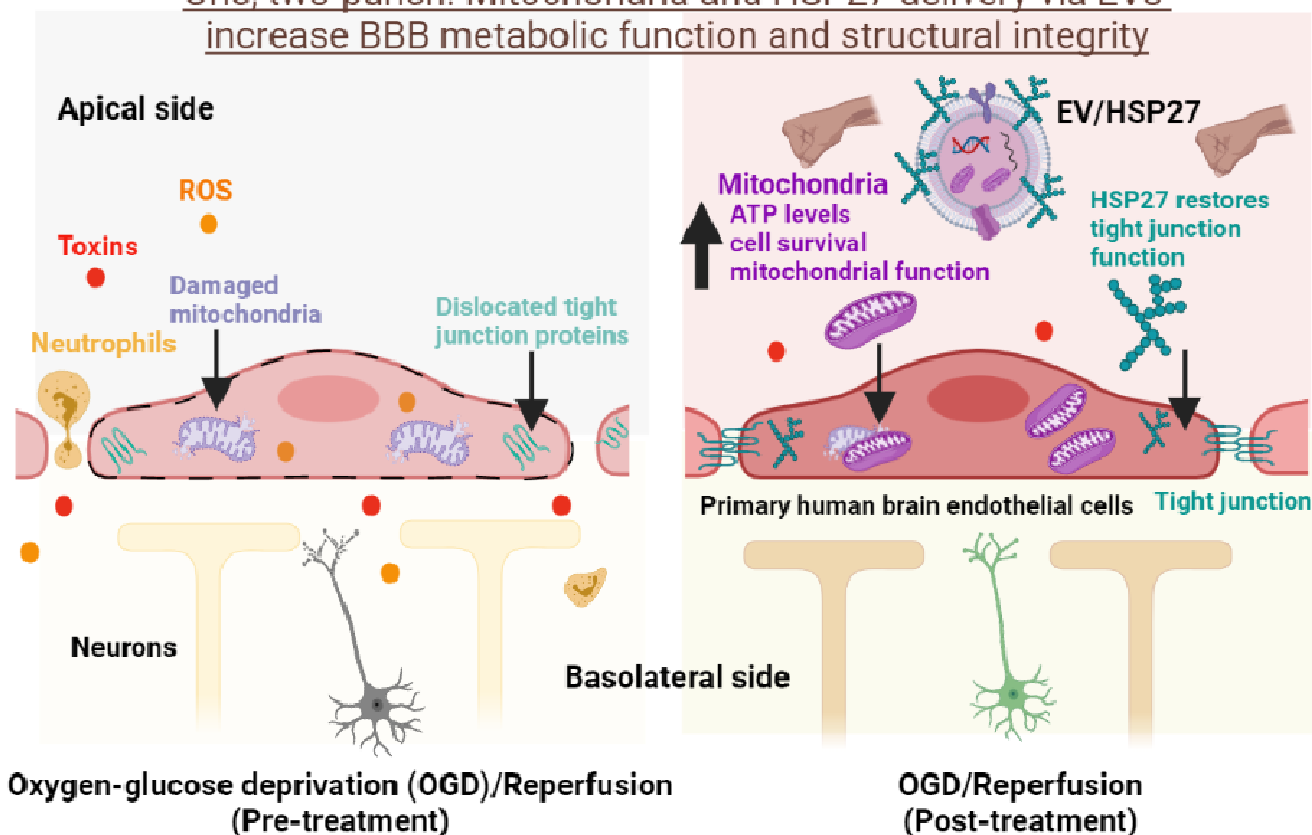

49

50

51

## 52 Keywords

53 Extracellular vesicles, mitochondria, microvesicles, heat shock protein, paracellular

54 permeability, BBB

## 55 **Abbreviations**

|    |              |                                                           |
|----|--------------|-----------------------------------------------------------|
| 56 | ATP          | Adenosine triphosphate                                    |
| 57 | BBB          | Blood-brain barrier                                       |
| 58 | BECs         | Brain endothelial cells                                   |
| 59 | Calcein AM   | Calcein acetoxymethyl                                     |
| 60 | ECAR         | Extracellular acidification rate                          |
| 61 | EVs          | Extracellular vesicles (exosomes and microvesicles)       |
| 62 | EXOs         | Exosomes                                                  |
| 63 | FT cycle     | Freeze/Thaw cycle                                         |
| 64 | GAPDH        | Glyceraldehyde 3-phosphate dehydrogenase                  |
| 65 | HSP27        | Heat shock protein 27                                     |
| 66 | hCMEC/D3     | human cerebral microvascular endothelial cell line        |
| 67 | HBMEC        | primary human brain microvascular endothelial cells       |
| 68 | HEPES        | 2-Hydroxyethylpiperazine-N'-2-Ethanesulfonic Acid         |
| 69 | MVs          | Microvesicles                                             |
| 70 | MitoT-red-EV | Mitotracker deep red-labeled extracellular vesicles       |
| 71 | OCR          | Oxygen consumption rate                                   |
| 72 | OGD          | Oxygen-glucose deprivation                                |
| 73 | OGD/RP       | Oxygen-glucose deprivation/reperfusion                    |
| 74 | PEI          | Polyethylenimine                                          |
| 75 | PEG-DET      | poly (ethylene glycol)- <i>b</i> -poly (diethyl triamine) |
| 76 | ROS          | Reactive oxygen species                                   |
| 77 | TRITC        | Tetramethyl rhodamine iso-thiocyanate                     |

## 78 **1. Introduction**

79 Acute ischemic stroke is a major cause of death worldwide with recurrence and mortality  
80 rates of one stroke per 40 seconds and four deaths per minute, respectively, in the United States  
81 of America (1). During the onset of ischemic stroke, the blood flow to a brain artery is obstructed  
82 due to blood clots and plaque formation, which leads to long-term neurological damage and  
83 dysfunction or even death (2). The lack of blood supply to the affected brain area causes the  
84 deprivation of vital ions, oxygen, and nutrients consequently resulting in sudden cellular energy  
85 failure, neuron depolarization, reactive oxygen species-mediated cell death, and blood-brain  
86 barrier (BBB) dysfunction (2-4). Alteplase (recombinant tissue plasminogen activator) is the  
87 only FDA-approved treatment for ischemic stroke which dissolves the blood clot and restores the  
88 blood flow (5). However, its narrow therapeutic window (<4.5 h of onset) limits its use to only  
89 about 5% of patients (4). Importantly, the reestablishment of blood flow in the affected brain  
90 area outside its therapeutic window contributes to the influx of water and osmotic solutes  
91 through the damaged BBB (ischemia/reperfusion) and consequently, aggravates the BBB  
92 breakdown and risk of hemorrhagic transformation (4, 6). The limited therapeutic options and  
93 the associated severe side effects associated with Alteplase drive the development of safe and  
94 efficient stroke therapeutics.

95  
96 Oxygen and glucose deprivation (OGD) in ischemic stroke reduce ATP levels in the  
97 endothelial cells lead to impaired functionality of  $\text{Na}^+\text{-K}^+\text{-ATPase}$  and  $\text{Ca}^{2+}$  ATPase activity  
98 which accumulates these cations within the cells (3, 4). This further leads to  $\text{Na}^+$  and water influx  
99 that causes endothelial swelling and breakdown of the BBB.  $\text{Na}^+$  accumulation-mediated  
100 depolarization of endothelial plasma membrane also rapidly increases intracellular  $\text{Ca}^{2+}$  and

101 activates the release of excitatory neurotransmitters such as glutamate and dopamine (7).  
102 Intracellular calcium overload catalyzes enzymatic activities leading to protein degradation,  
103 DNA damage, generation of reactive oxygen species (ROS), mitochondrial dysfunction, and the  
104 subsequent impairment of mitochondrial ROS defense mechanisms. Overall, hypoperfusion in  
105 the ischemic brain region leads to a rapid decrease in endothelial ATP levels, endothelial  
106 swelling, and mitochondrial dysfunction. Therefore, restoring the endothelial bioenergetics and  
107 mitochondrial function is a viable strategy to rescue ischemic endothelial cell death. In addition,  
108 disruption of the BBB is a major hallmark of ischemic stroke that is associated with altered  
109 expression of tight junctions, adherens junction proteins, and BBB transporters (2-4). Early  
110 ischemia/reperfusion activates the polymerization of the actin cytoskeleton in endothelial cells  
111 which triggers the formation of F-actin and myosin-containing contractile stress-fibers. These  
112 force-generating fibers transmit tension to the tight and adherens junction proteins which  
113 disassemble and internalize the tight junction proteins and consequently lead to the loss of barrier  
114 properties of the endothelial cells lining the BBB (8, 9). Uncontrolled actin polymerization-  
115 induced breakdown of BBB leads to infiltration of proinflammatory mediators, blood cells,  
116 circulatory immune cells, and toxins into the brain parenchyma, and lead to the secondary injury  
117 cascade (9, 10). Hence, a combined strategy to increase the endothelial cell bioenergetics to  
118 decrease cell death and reduce their paracellular permeability, ultimately leading to protection of  
119 BBB integrity is a viable approach for the treatment of ischemia/reperfusion injury.

120

121 Preclinical studies have demonstrated that endothelial, but not neuronal overexpression of  
122 heat shock protein 27 (HSP27), inhibited actin polymerization and elicited long-lasting  
123 protection against ischemia/reperfusion-induced BBB disruption and neurological deficits (9,

124 10). Lower endothelial HSP27 levels increase BBB permeability and slow down the recovery of  
125 the damaged BBB under pathological conditions (11). HSP27 binds to actin monomer and also  
126 sequesters globular-actin (G-actin) monomer in the endothelial cells that prevents the binding of  
127 G-actin to filamentous-actin (F-actin) and further inhibits tight junctional protein translocation in  
128 endothelial cells (9, 11-14). HSP27 (24-27 kD) is a highly conserved molecular chaperone from  
129 a small HSP family (15) and has multiple functionalities including suppression of caspase  
130 activation (16, 17), inhibition of cytochrome release (18), and reduction of protein aggregation.  
131 Intravenous administration of cell-penetrating transduction domain (TAT)-HSP27 rapidly  
132 enhanced HSP27 levels in brain microvessels and reduced infarct volume as well as  
133 ischemia/reperfusion-induced BBB disruption (9). However, the systemic delivery of HSP27  
134 using cationic TAT peptide resulted in non-specific uptake-associated side effects in the brain  
135 and other tissues (9). Therefore, the delivery of exogenous human recombinant HSP27 protein to  
136 the brain endothelial cells (BECs) using natural carriers like extracellular vesicles (EVs) can  
137 likely increase its specific uptake into BECs owing to inherent membrane affinity of BEC-  
138 derived EVs to parent/donor BECs (19, 20).

139

140 EVs (exosomes and microvesicles) are an emerging class of natural nanocarriers for  
141 biotherapeutics due to their known roles in intercellular communication, lower immunogenicity,  
142 and inherent homing capabilities to target cells (21, 22). Exosomes (EXOs) range from 30-200  
143 nm in particle diameter and their biogenesis involves the inward budding of endosomal  
144 membranes that transforms into multivesicular bodies (MVBs) followed by their fusion with the  
145 plasma membrane and EXOs release into extracellular spaces (22). The biogenesis of  
146 microvesicles (MVs) involves their outward budding from the cell's plasma membrane with



147 particle diameters ranging from 100 – 1000 nm (22). The selective packaging of the functional  
148 mitochondria and mitochondrial proteins in the MVs can increase the bioenergetics of recipient  
149 cells by releasing their vesicular components, including mitochondria, nucleic acids, proteins,  
150 and lipids. Mitochondria play a central role in cellular energy production and regulation of cell  
151 death including apoptosis and autophagy (23). Ischemia-induced mitochondrial dysfunction  
152 initiates the generation of excessive reactive oxygen species, reduction in ATP levels, and  
153 consequently cellular and neuronal death (23). Therefore, protection of mitochondrial function  
154 via exogenous functional mitochondria supplementation is an exciting strategy to increase  
155 endothelial cell survival post-ischemic stroke. Thus, we rationalize that mitochondria-rich MVs  
156 derived from brain endothelial cells can increase cellular bioenergetics and survival under  
157 normoxic and hypoxic conditions.

158  
159 Surface engineering of BEC-derived EVs with exogenous HSP27 is a promising strategy that  
160 can allow harnessing the inherent targeting capabilities of the EVs to the recipient BECs along  
161 with the added benefits of their mitochondrial load. Alongside BEC-derived EVs, we have also  
162 tested the capability of a synthetic cationic polymer, poly (ethylene glycol)-*b*-poly  
163 (diethyltriamine) (PEG-DET) to formulate and deliver HSP27. We have previously used PEG-  
164 DET polymer to form nanosized complexes with superoxide dismutase protein and demonstrated  
165 a >50% reduction in brain infarct volume in a mouse model of acute ischemic stroke (24). PEG-  
166 DET is a cationic diblock copolymer known for its safety and gene transfer efficacy in  
167 comparison to commercial transfection agents such as lipofectamine, polyethyleneimine, and  
168 other cationic polymers (25-27).

169

170 Here, we *hypothesize* that the engineering of innate mitochondria-containing BEC-derived  
171 EVs with exogenous HSP27 protein is one double-punch approach to increase BEC survival (via  
172 mitochondrial delivery) and preserve its tight junction barrier via decreasing the paracellular  
173 permeability (via HSP27 delivery) of the endothelial monolayers post-ischemia. This approach  
174 will protect and strengthen the BBB that in turn can ameliorate the long-term neurological  
175 damage and dysfunction.

176  
177 In this study, we isolated EXOs and MVs from hCMEC/D3: a human brain endothelial cell  
178 line using a sequential ultracentrifugation method (28) and characterized their particle diameter,  
179 zeta potential, and membrane integrity post-cold storage. While we collectively refer to both  
180 large (MV) and small (EXO) vesicle fractions as EVs, we have studied the singular effects of  
181 both MVs and EXOs. We demonstrated the presence of mitochondria in MV sections using  
182 transmission electron microscopy. We evaluated the effects of EV dose and incubation times on  
183 mitochondrial transfer to the recipient cells and demonstrated the integration of MV-delivered  
184 mitochondria with the mitochondrial network of the recipient endothelial cells. We studied the  
185 effects of EV exposure on the resulting relative ATP levels, mitochondrial respiration, and  
186 glycolytic capacity of the recipient endothelial cells under normoxic and hypoxic conditions. The  
187 formation of EV/HSP27 and PEG-DET/HSP27 complexes/mixtures and their physicochemical  
188 characteristics were confirmed using native polyacrylamide gel electrophoresis and dynamic  
189 light scattering. The cytocompatibility of EV/HSP27 mixtures and PEG-DET/HSP27 complexes  
190 were evaluated using an ATP assay. The effects of HSP27 delivery on the paracellular  
191 permeability of small and large molecule fluorescent tracers were evaluated under ischemic and  
192 ischemia/reperfusion conditions in primary human brain endothelial cultures.

193

## 194 **2. Materials**

195 Recombinant human HSP27 was purchased from Novus Biologicals (Centennial, CO). Cell  
196 Titer Glo 2.0 reagent (ATP assay) was procured from Promega (Madison, WI). Micro BCA and  
197 Pierce BCA protein assay kits were purchased from Thermo Scientific (Rockford, IL). PEG-DET  
198 polymer was synthesized by aminolysis of PEG-poly( $\beta$ -benzyl L-aspartate) block copolymers  
199 with diethyltriamine as previously reported (25, 27, 29, 30). Bio-Safe Coomassie G-250 stain  
200 was purchased from Bio-Rad Laboratories Inc. (Hercules, CA). Collagen Type I was purchased  
201 from Corning (Discovery Labware Inc, Bedford, MA) and endothelial cell basal medium-2  
202 (EBM-2) was procured from Lonza (Walkersville, MD). Hydrocortisone, human basic fibroblast  
203 growth factor and ascorbic acid were purchased from Sigma-Aldrich (Saint Louis, MO).  
204 Penicillin-Streptomycin solution and Chemically Defined Lipid Concentrate were procured from  
205 Invitrogen (Carlsbad, CA). Heat-inactivated fetal bovine serum was bought from Hyclone  
206 Laboratories (Logan, UT). Polycarbonate centrifuge tubes were purchased from Beckman  
207 Coulter, Inc. (Brea, CA). Electrophoresis sample buffer was purchased from Bio-Rad (Hercules,  
208 CA). RIPA buffer was procured from Alfa Aesar (Ward Hill, MA). PET track-etched membrane  
209 Falcon Cell Culture inserts of 0.4  $\mu$ m pore size were procured from Corning (Discovery Labware  
210 Inc, Bedford, MA). TRITC 65-85 kD and 4.4 kD dextran was procured from Sigma (St. Louis,  
211 MO). A low-volume disposable cuvette (Part no. ZEN0040, Malvern) was used for particle size  
212 measurements. CellLight Mitochondria-GFP Backman 2.0 reagent, MitoTracker Green FM, and  
213 MitoTracker Deep Red FM, Dynabeads Protein G (cat#10003D), and DynaMag-2 magnetic  
214 stand (cat#12321D) were procured from Invitrogen (Eugene, OR). Mouse monoclonal antibodies  
215 against ATP5A, GAPDH, HSP27 were purchased from Abcam. Mouse monoclonal antibody

216 against CD9 was received from Life Technologies corporation (Eugene, OR), whereas Alexa  
217 Fluor 790-conjugated donkey anti-mouse IgG was received from Jackson ImmunoResearch Lab  
218 Inc (West Grove, PA).

219

## 220 **2.1. Cell models**

221 A human cerebral microvascular endothelial cell line (hCMEC/D3, catalog number.  
222 102114.3C) was received from Cedarlane Laboratories (Burlington, Ontario) at passage number  
223 (P) 25, and cells between P25 and P35 were used in all experiments (19, 28). hCMEC/D3 cells  
224 were grown in tissue culture flasks, multiwell plates, or transwell inserts pre-coated using 0.15  
225 mg/mL rat collagen I in a humidified 5% CO<sub>2</sub> incubator at 37 ± 0.5°C (Isotemp, Thermo Fisher  
226 Scientific). The cells were cultured in complete growth medium composed of endothelial cell  
227 basal medium (EBM-2) supplemented with fetal bovine serum (5% FBS), penicillin (100  
228 units/mL)-streptomycin (100 µg/mL) mixture, hydrocortisone (1.4 µM), ascorbic acid (5  
229 µg/mL), Chemically Defined Lipid Concentrate (0.01%), 10 mM HEPES (pH 7.4), and bFGF (1  
230 ng/mL). The complete growth medium was replenished every other day until the cells formed  
231 confluent monolayers. Prior to passage, the cells were washed using 1x phosphate buffer saline  
232 (PBS) and detached from the flask using 1x TrypLE Express Enzyme (gibco, Denmark). We  
233 received primary human brain microvascular endothelial cells (HBMEC, catalog no. ACBRI  
234 376) from Cell Systems (Manassas, VA) at P3, and cells below P11 were used in all  
235 experiments. HBMECs maintained in Cell Systems Classic Culture Medium containing 1%  
236 culture boost were cultured in tissue culture flasks, multiwell plates, or transwell inserts pre-  
237 treated with attachment factors. The complete growth medium was replenished every day until  
238 the cells formed confluent monolayers. For passage, HBMEC monolayers were washed with

239 Passage Reagent Group 1 (PRG 1, dPBS/EDTA solution), detached with PRG 2 (dPBS/trypsin-  
240 EDTA solution) and PRG 3 (trypsin inhibitor solution).

241

## 242 **2.2. Isolation of exosomes and microvesicles from hCMEC/D3 cells**

243 It should be noted that while we collectively refer to both large (microvesicle: MV) and small  
244 (exosome: EXO) vesicle fractions as EVs, we study both MVs and EXOs. Wherever noted, a 1:1  
245 w/w mixture of EXOs and MVs is collectively referred to as EVs. EXOs and MVs were isolated  
246 from conditioned medium supernatants of hCMEC/D3 cells using the differential  
247 ultracentrifugation method (28). Briefly, tissue culture flasks with 175 cm<sup>2</sup> growth area (T175)  
248 containing confluent hCMEC/D3 were washed with pre-warmed 1x PBS and incubated with  
249 serum-free medium for 48 h in a humidified 5% CO<sub>2</sub> incubator at 37 ± 0.5°C. Post-incubation,  
250 the EV-conditioned medium was collected in polypropylene centrifuge tubes and centrifuged at  
251 2000 ×g for 22 min at 4°C to pellet down apoptotic bodies and cell debris using a Sorvall ST 8R  
252 centrifuge (ThermoFisher Scientific, Osterode am Harz, Germany). The supernatant was  
253 transferred into polycarbonate tubes and centrifuged at 20,000 ×g for 45 min at 4°C to pellet  
254 down MVs using an Optima XE-90 ultracentrifuge equipped with a 50.2 Ti rotor (Beckman  
255 Coulter, Indianapolis, IN). Next, the supernatant was filtered through a 0.22 μm PES membrane  
256 syringe filter, and the flow-through was centrifuged at 120,000 ×g for 70 min at 4°C to collect  
257 EXOs. Lastly, MV and EXO pellets were washed with 1x PBS and suspended in either 1x PBS  
258 for particle diameter measurements and *in vitro* experiments or 10 mM HEPES buffer pH 7.4 for  
259 zeta potential measurements. EXO and MV samples were stored at -80°C until further use. The  
260 total protein content in EXOs and MVs was quantified using Pierce MicroBCA assay. Briefly,  
261 EXOs and MVs were lysed with 1x RIPA buffer containing 3 μg/mL aprotinin at a 1:15 v/v

262 ratio. Following that, a 150  $\mu$ L volume of EXO/MV lysates or BSA standards (0.5–200  $\mu$ g/mL)  
263 was pipetted into a 96-well plate and an equal volume of the MicroBCA working reagent  
264 (reagent A: reagent B: reagent C at 25:24:1 volume ratio) was added to each well. The reagent  
265 mixture was incubated at 37 °C for 2 h and the absorbance was measured at 562 nm using a  
266 SYNERGY HTX multi-mode reader (BioTek Instruments Inc., Winooski, VT).

267

### 268 **2.3. Dynamic light scattering (DLS) and Nanoparticle tracking analysis (NTA)**

269 The stability of naïve EVs under storage conditions was determined by their measuring  
270 particle diameter and zeta potential using dynamic light scattering. EV samples at 0.5 mg  
271 protein/mL in 1x PBS were frozen at -20°C for 24 h and thawed at room temperature for 30 min.  
272 Post-thawing, the particle diameters, and dispersity indices were measured using Malvern  
273 Zetasizer Pro (Worcestershire, UK). The freeze-thaw (FT) cycle was repeated three times and all  
274 samples were run in triplicate. Average particle diameter, dispersity index, and zeta potential  
275 values were reported as mean  $\pm$  standard deviation. For NTA, stock samples of EXOs and MVs  
276 were diluted 100 times in PBS and analyzed on a multiple-laser ZetaView f-NTA Nanoparticle  
277 Tracking Analyzer (Particle Metrix Inc., Mebane, NC). Three 60 s videos were acquired at 520  
278 nm laser wavelength for particle diameter and concentration measurements. Average particle  
279 diameter and concentration were reported as mean  $\pm$  standard deviation.

280

### 281 **2.4. Membrane integrity of EVs after isolation and upon storage conditions**

282 The membrane integrity of EXOs and MVs post-isolation and upon revival after their storage  
283 conditions (described earlier in the DLS section) was determined using a calcein AM flow  
284 cytometry assay. First, polystyrene sub-micron-sized beads ranging from 0.2 – 2  $\mu$ m particle

285 diameters were used to calibrate the Attune NxT flow cytometer. The calibration beads, EXO,  
286 and MV samples were tested and events captured in forward scatter (FSC) and side scatter (SSC)  
287 plots were analyzed using a small particle side scatter 488/10-nm filter (BL1) channel. EXOs and  
288 MVs were diluted to 20  $\mu\text{g}$  protein/mL in PBS and incubated/stained with 10  $\mu\text{M}$  calcein AM for  
289 20 min at room temperature in the dark. Unstained EXOs and MVs were used to gate the  
290 background signals, whereas samples treated with 2% v/v Triton X-100 followed by staining  
291 with calcein AM were used as controls to determine if calcein-positive signals were specifically  
292 associated with intact EVs. For each sample analysis, an aliquot of 100  $\mu\text{L}$  was run through  
293 Attune NxT Acoustic cytometer (Invitrogen, Singapore) and 50,000 events were recorded during  
294 the run. The calcein-associated fluorescence intensity was detected at 488/10 nm and percentage  
295 signal intensities were presented in histogram plots generated using Attune software. Calcein  
296 AM-associated background signals were gated using the controls such as PBS containing 10  $\mu\text{M}$   
297 calcein AM and PBS/2% Triton X-100/calcein AM mixture.

298

## 299 **2.5. Transmission Electron Microscopy analysis of EVs**

300 Exosomes/microvesicles were loaded on Formvar/carbon-coated grids, negatively stained  
301 with 1% uranyl acetate and examined with a JEM-1400 Plus transmission electron microscope  
302 (JEOL, Peabody, MA, USA) fitted with an AMT digital camera (Danvers, MA, USA) (31).  
303 Suspensions of exosomes/microvesicles were pelleted at 100,000xg in a Beckman airfuge for 20  
304 min and the pellets were fixed in 2.5% glutaraldehyde in PBS overnight. The supernatant was  
305 removed and the cell pellets were washed 3x in PBS and post-fixed in 1%  $\text{OsO}_4$ , 1%  $\text{K}_3\text{Fe}(\text{CN})_6$   
306 for 1 hour. Following 3 additional PBS washes, the pellet was dehydrated through a graded  
307 series of 30-100% ethanol. After several changes of 100% resin over 24 hours, pellet was

308 embedded in a final change of resin, cured at 37°C overnight, followed by additional hardening  
309 at 65°C for two more days. Ultrathin (70 nm) sections were collected on 200 mesh copper grids,  
310 stained with 2% uranyl acetate in 50% methanol for 10 minutes, followed by 1% lead citrate for  
311 7 min. Sections were imaged using a JEOL JEM 1400 Plus transmission electron microscope  
312 (Peabody, MA) at 80 kV fitted with a side mount AMT 2k digital camera (Advanced Microscopy  
313 Techniques, Danvers, MA).

314

## 315 **2.6. Uptake of Mitotracker-labeled EVs into hCMEC/D3 cells using flow cytometry**

### 316 **2.6.1. Isolation of mitochondria-labeled EVs**

317 hCMEC/D3 cells (P32) were cultured in a T175 flask to confluency. The complete growth  
318 medium was removed, cells were washed with 1x PBS, and cells were incubated with 250 nM  
319 Mitotracker deep red (MitoT-red) diluted in a conditioned medium for 30 min in a humidified  
320 incubator. Next, the medium was replaced with serum-free medium after washing the cells with  
321 1x PBS, and cells were kept in a humidified incubator for 24 h. Post-incubation, the conditioned  
322 medium was collected into centrifuge tubes. EXOs (MitoT-red-EXO) and MVs (MitoT-red-MV)  
323 from Mitotracker Red-labeled cells were isolated from the conditioned medium using the  
324 differential centrifugation method described in section 2.2. The EV protein content in MitoT-red-  
325 EXOs and MitoT-red-MVs were determined using MicroBCA assay and the samples were stored  
326 at -80 °C until further use.

327

### 328 **2.6.2. Quantification of EV-mediated mitochondria transfer into recipient hCMEC/D3 cells** 329 **using flow cytometry**



330 hCMEC/D3 cells were cultured in 48-well plates at 50,000 cells/well in complete growth  
331 medium. Unstained and untreated cells were used as a control, whereas cells stained with 250  
332 nM of Mitotracker deep red (MitoT-red) for 45 min in complete growth medium were used as a  
333 positive control. The cells were treated with MitoT-red-EXOs and MitoT-red-MVs at 30, 75, and  
334 150 µg EV protein/well in complete growth medium for 72 h in a humidified incubator. The cells  
335 were also treated with unlabeled EXOs and MVs at 150 µg EV protein/well in complete growth  
336 medium for 72 h. Post-treatment, the cells were washed with 1x PBS, dissociated using TrypLE  
337 Express, diluted with PBS, and collected into centrifuge tubes. For each sample, an aliquot of a  
338 100 µL cell suspension was analyzed through Attune NxT Flow cytometer and 10,000 events  
339 were recorded in FSC vs. SSC plots. The Mitotracker deep red-associated fluorescence intensity  
340 was detected at 670/14 nm and percentage signal intensities were presented in histogram plots  
341 generated using Attune software version 3.2.3. Mitotracker deep red-associated background  
342 signals were gated using the controls including PBS and untreated cells.

## 343

### 344 **2.7. Uptake of Mitotracker-labeled EVs into primary human brain endothelial cells using**

### 345 **fluorescence microscopy**

#### 346 **2.7.1. Uptake of MitoT-red-EXOs and MitoT-red-MVs into primary HBMEC monolayers**

347 MitoT-red EXOs and MitoT-red-MVs were isolated from the conditioned medium of  
348 hCMEC/D3 cells as described in section 2.6.1. Primary HBMEC (P6) were cultured in 96-well  
349 plates at 16,500 cells/well in complete growth medium. Post-confluency, the cells were treated  
350 with MitoT-red-EXO and MitoT-red-MV at 10, 25, and 50 µg EV protein/well in complete  
351 growth medium for 24, 48, and 72 h in a humidified incubator. At each time-point, the cells were  
352 observed under an Olympus IX 73 epifluorescent inverted microscope (Olympus, Pittsburgh,

353 PA) using the Cyanine-5 (Cy5, excitation 651 nm, and emission 670 nm) and bright-field  
354 channels at 20x magnification. Images were acquired using CellSens Dimension software  
355 (Olympus, USA).

356

## 357 **2.7.2. Colocalization of EV-mitochondria with the mitochondrial network in the recipient** 358 **hCMEC/D3 and HBMEC monolayers**

### 359 **2.7.2.1. Mitotracker green staining of recipient cell mitochondria**

360 HBMEC and hCMEC/D3 cells were seeded in a 96 well-plate at 16,500 cells/well and  
361 incubated in a humidified incubator at 37°C. Post-confluency, the complete growth medium was  
362 removed, cells were washed with 1x PBS, and cells were incubated with 250 µM of Mitotracker  
363 green in a complete medium for 30 min. Post-treatment, the medium was replaced, washed with  
364 PBS, and incubated with MitoT-red-EXO or MitoT-red-MV at 50 µg EV protein/well in a  
365 complete growth medium for 72 h in a humidified incubator. hCMEC/D3 cells stained with only  
366 Mitotracker green were used as a control. Post-incubation, the medium was removed, cells were  
367 washed and incubated with phenol-red free and serum-containing DMEM-high glucose medium.  
368 The cells were then observed under an Olympus IX 73 epifluorescent inverted microscope  
369 (Olympus, Pittsburgh, PA) using Cyanine-5 channel (Cy5, excitation 651 nm, and emission 670  
370 nm) to detect MitoT-red-EV uptake and GFP channel to detect Mitotracker Green signals at 20x  
371 magnification and images were acquired using CellSens Dimension software (Olympus, USA).

372

### 373 **2.7.2.2. Staining of a mitochondrial matrix protein in the recipient cells using CellLight** 374 **Mitochondria-GFP BackMam reagent**

375 We used CellLight Mitochondria-GFP BacMam to label a structural mitochondrial matrix  
376 protein (32). CellLight Mito-GFP is a fusion construct of the leader sequence of a mitochondrial  
377 matrix protein, E1 alpha pyruvate dehydrogenase, and emerald Green Fluorescent Protein  
378 (emGFP). HBMEC and hCMEC/D3 cells were seeded in a 96 well-plate at 16,500 cells/well and  
379 incubated in a humidified incubator at 37°C. Post-confluency, the complete growth medium was  
380 removed, cells were washed with 1x PBS, and cells were incubated with CellLight  
381 Mitochondria-GFP reagent (at a dilution of 2  $\mu$ L/10,000 cells as recommended by the  
382 manufacturer) for 16 h. Post-transduction, the medium was removed and cells were washed with  
383 1x PBS. Next, the cells were incubated with MitoT-red-EXO and MitoT-red-MV at 50  $\mu$ g EV  
384 protein/well in complete growth medium for 72 h in a humidified incubator. HBMEC or  
385 hCMEC/D3 cells transduced with only CellLight Mitochondria-GFP were used as a control.  
386 Post-incubation at 24 and 72 h, the medium was removed, cells were washed and incubated with  
387 phenol-red free and serum-containing DMEM-high glucose medium. The cells were then  
388 observed under Olympus IX 73 epifluorescent inverted microscope (Olympus, Pittsburgh, PA)  
389 using Cyanine-5 channel (Cy5, excitation 651 nm, and emission 670 nm) to detect MitoT-EV  
390 uptake and GFP channel for CellLight Mitochondria-GFP signals at 20x magnification and  
391 images were acquired using CellSens Dimension software (Olympus, USA).

392

## 393 **2.8. Effects of naïve EV treatment in primary HBMECs under normoxic and oxygen-** 394 **glucose-deprived (OGD) conditions**

395 To simulate ischemic conditions *in vitro*, hCMEC/D3 cells were exposed to different oxygen  
396 glucose-deprivation (OGD) parameters, and the resulting cell viability was evaluated using an  
397 ATP assay (28, 33, 34). hCMEC/D3 cells were cultured in 96-well plates at 16,500 cells/well.

398 Confluent hCMEC/D3 cells were incubated with OGD medium defined as follows: 120 mM  
399 NaCl, 5.4 mM KCl, 1.8 mM CaCl<sub>2</sub>, 0.8 mM MgCl<sub>2</sub>, 25 mM Tris-HCl, pH 7.4 for 0.5 to 24 h in  
400 either normoxic or hypoxic conditions (35). For normoxic conditions, the culture plates were  
401 incubated in a humidified incubator with 95% air and 5% carbon dioxide whereas for hypoxic  
402 conditions, the culture plates were incubated in an OGD chamber (Billups Rothenberg, Del Mar,  
403 CA) pre-flushed with 5% carbon dioxide, 5% hydrogen and 90% nitrogen at 37±0.5°C. For  
404 normoxic conditions, the medium was removed and the recipient HBMEC monolayers were  
405 incubated with hCMEC/D3-derived EXOs, MVs, and EXOs+MVs at doses of 10, 25, and 50 µg  
406 EV protein/well in a humidified incubator for 24, 48, and 72 h. For hypoxic conditions, the  
407 medium was removed and the recipient HBMEC monolayers were incubated with hCMEC/D3-  
408 derived EXOs, MVs, and EXOs+MVs at doses of 10, 25, and 50 µg EV protein/well in the OGD  
409 medium and a humidified incubator for 24 h. Then, the treatment mixtures were replaced with  
410 pre-warmed complete growth medium, and an equal quantity of Cell Titer Glo 2.0 reagent was  
411 added. The plates were incubated for 15 min at RT on an orbital shaker in the dark and relative  
412 luminescence units were measured at 1 s integration time.

413

## 414 **2.9. Measurement of mitochondrial function using Seahorse Analysis**

415 The oxidative phosphorylation and glycolytic functions of hCMEC/D3 cells treated with EVs  
416 during normoxic conditions were evaluated using the Seahorse analysis by measuring oxygen  
417 consumption rate (OCR) and Extracellular Acidification rate (ECAR) (19, 36). hCMEC/D3 cells  
418 seeded at 20,000 cells/well were cultured in Seahorse XF96 plate for four days. The cells were  
419 incubated with hCMEC/D3-derived EXOs, MVs, and EXOs+MVs for 24, 48, and 72h at 3.4,  
420 8.3, and 16.5 µg EV protein/well equivalent to 30, 75, and 150 µg EV protein/cm<sup>2</sup> in complete

421 growth medium. Post-incubation, the medium was replaced with pre-warmed DMEM and  
422 subjected to Seahorse analysis (19). After measurement of baseline OCR, 2.5  $\mu\text{mol/L}$  oligomycin  
423 A and 0.7  $\mu\text{mol/L}$  carbonyl cyanide-p-trifluoromethoxyphenyl-hydrazone were consecutively  
424 added to measure the proton leak and maximal OCR, respectively (36). The total protein of the  
425 cells in each well was measured using Pierce BCA assay.

426

## 427 **2.10. Complexation of HSP27 with PEG-DET, EXO, MV, and PEG-DET-EV**

428 PEG-DET/HSP27 complexes were prepared using a rapid mixing method. A PEG-DET  
429 polymer solution prepared in 10 mM HEPES buffer, pH 7.4 was mixed with 2  $\mu\text{g}$  HSP27 at  
430 PEG-DET/HSP27 w/w ratio 0.05, 0.2, 1, 5, 10, and 20:1 for 30 s. The mixture was incubated at  
431 room temperature (RT) for 30 min. For the preparation of EXO/HSP27 and MV/HSP27  
432 mixtures, hCMEC/D3-derived EVs were suspended in 1x PBS were incubated with 2  $\mu\text{g}$  HSP27  
433 at EV protein/HSP27 w/w ratios 5, 10, and 15:1 in centrifuge tubes. The mixture was vortexed  
434 for 30 s and incubated at room temperature for 30 min. To prepare (PEG-DET/HSP27)/EV  
435 complexes, PEG-DET/HSP27 complexes were prepared at 20:1 and 30:1 w/w ratios followed by  
436 incubation with 10  $\mu\text{g}$  EV protein for 30 min at RT. The different complexes were characterized  
437 for electrophoretic mobility, particle diameter, and zeta potential.

438

## 439 **2.11. Native Polyacrylamide Gel Electrophoresis (PAGE)**

440 The complexation of HSP27 with PEG-DET, EXO, and MV was confirmed using native  
441 PAGE. A polyacrylamide gel consisting of 4% and 10% of acrylamide in the stacking and  
442 resolving sections, respectively, was prepared using a gel casting assembly (Bio-Rad  
443 Laboratories Inc., Hercules, CA) (28, 33). Native HSP27, PEG-DET/HSP27, and EV/HSP27

444 complexes containing 2  $\mu\text{g}$  of HSP27 at the indicated w/w ratios were mixed with native sample  
445 buffer and loaded into the gel lanes. Free PEG-DET polymer, naïve EXOs, and MVs equivalent  
446 to indicated w/w ratios were used as controls. In an independent experiment, PEG-DET/HSP27  
447 at w/w 20:1 and 30:1 was complexed with EXOs, MVs, and EVs (EXO: MV 1:1) at PEG-DET  
448 to EV protein 2:1 and 3:1 w/w ratios. The gel was run in 1x Tris-Glycine buffer, pH 8.3 at 100 V  
449 for 2 h at 2-8 °C using PowerPac Basic setup (Bio-Rad Laboratories Inc., Hercules, CA). Post-  
450 electrophoresis, the gel was washed with deionized water for 30 min and stained with 50 mL of  
451 Biosafe Coomassie blue G-250 for 1 h on an orbital shaker at room temperature. The gel was  
452 washed with deionized water for 30 min and scanned under Odyssey imager (LI-COR Inc.,  
453 Lincoln, NE) at 800 nm channel and intensity setting 5. The band densities were quantified using  
454 ImageStudio 5.2 software.

455

## 456 **2.12. Dynamic light scattering analysis of HSP27 complexes**

457 The average particle diameters, dispersity indices, and zeta potentials of the HSP27  
458 complexes were analyzed using a Malvern Zetasizer Pro (Worcestershire, UK). hCMEC/D3 cell  
459 line-derived naïve EVs at 0.5 mg EV protein/mL were diluted in either 1x PBS for size and  
460 dispersity index or 10 mM HEPES buffer pH 7.4 for zeta potential measurements. In addition,  
461 particle sizes and dispersity indices of native HSP27 protein at 20  $\mu\text{g/mL}$ , PEG-DET/HSP27  
462 complexes at 10, 20, and 30:1 w/w ratios, EXO/HSP27 and MV/HSP27 mixtures at 10:1 w/w  
463 ratio were measured in a low-volume disposable cuvette. Free PEG-DET equivalent to 10, 20,  
464 and 30:1 w/w ratios and naïve EVs equivalent to 10:1 w/w ratio were also analyzed. For the zeta  
465 potential of the above complexes, a 50  $\mu\text{L}$  sample of complexes was further diluted in zeta  
466 cuvette containing 10 mM HEPES buffer at pH 7.4. The samples were run in triplicate. Data are

467 presented as average particle diameter±standard deviation. The reported data are representative  
468 of 3 independent experiments.

469

### 470 **2.13. Cytocompatibility of HSP27 complexes with primary HBMEC and hCMEC/D3** 471 **monolayers**

472 The cell viability of hCMEC/D3 and primary HBMEC monolayers treated with HSP27  
473 complexes was measured using Cell Titer Glo (ATP) assay. hCMEC/D3 and HBMEC were  
474 seeded at 16,500 cells/well in a 96 well-plate and cultured in a humidified incubator at 37±0.5°C.  
475 The growth medium was replaced with treatment mixtures containing either native HSP27,  
476 EXO/HSP27 (10:1), MV/HSP27 (10:1), EXO+MV at 1:1/HSP27 (10:1), or PEG-DET/HSP27  
477 (20:1) at a dose of 2 µg HSP27 protein per well. Naïve EXOs, MVs, equivalent amounts of  
478 EXOs+MVs, and free PEG-DET equivalent to 20:1 in complete medium were used as controls.  
479 Polyethyleneimine (PEI) at 50 and 100 µg/mL in a complete growth medium was used as a  
480 positive control. The complexes and controls were treated for 72 h in a humidified incubator at  
481 37±0.5°C. Post-incubation, the ATP assay was performed using Cell Titer Glo 2.0 reagent as  
482 described earlier in section 2.8. The cell viability of HSP27 complexes treated HBMECs was  
483 calculated using Equation 1.

$$484 \quad \text{Cell viability (\%)} = \frac{\text{Relative light units (RLU) of treated cells}}{\text{RLU of untreated cells}} \times 100 \quad (\text{Equation 1})$$

485

### 486 **2.14. Paracellular permeability of TRITC-labeled 65-85 and 4.4 kD Dextran in HBMEC** 487 **monolayers pre-treated with PEG-DET/HSP27 complexes**

#### 488 **2.14.1 Hypoxic conditions (OGD only)**

489 Primary HBMEC (P4-P9) in a complete growth medium were seeded at 50,000 cells/cm<sup>2</sup> in a  
490 24-well format cell culture insert (insert area: 0.33 cm<sup>2</sup>) for four days to form a complete  
491 endothelial monolayer. The medium was replaced every 48 h during this culturing period. The  
492 abluminal wells were filled with complete growth medium throughout the culturing period. The  
493 complete growth medium was replaced with 300 µL of growth medium containing PEG-  
494 DET/HSP27 at a w/w ratio of 20:1 and a dose of 2 µg HSP27/well for 72 h. Post-treatment, the  
495 complete growth medium was replaced with 300 µL of OGD medium containing 1 µM TRITC-  
496 Dextran. The OGD medium containing 1µM TRITC-Dextran alone was used as a control. The  
497 medium containing 1µM TRITC-Dextran in complete growth medium alone was used as an  
498 additional control. The abluminal chamber was filled with 0.5 mL of fresh complete growth  
499 medium. The untreated group was incubated in a humidified incubator whereas OGD treatment  
500 groups were incubated in an OGD chamber (as described earlier in section 2.8.). The  
501 concentration of TRITC-Dextran in the abluminal medium was measured at 4, 6, and 24 h post-  
502 treatment. A 50 µL aliquot was collected at indicated time points from the abluminal side. An  
503 equal volume of fresh medium was replaced to maintain the sink conditions. The concentration  
504 of TRITC-Dextran was measured using Synergy HTX multimode plate reader at excitation  
505 485/20 and emission 580/50 nm. The diffusion rate of TRITC-Dextran at each time point was  
506 calculated by the amount of TRITC- Dextran per surface area (0.33 cm<sup>2</sup>) of the insert per time  
507 (30 min).

508

#### 509 **2.14.2. OGD/reperfusion**

510 Post-24 h of OGD exposure, HBMECs in the culture inserts were washed with 1x PBS.  
511 HBMECs were incubated with a complete growth medium containing 1 µM TRITC 65-85 or 4.4



512 kD Dextran in a 24-well format cell culture insert for 1h – 24h (reperfusion) in a humidified  
513 incubator. The abluminal chamber was filled with 0.5 mL of fresh complete growth medium.  
514 The concentration of TRITC-Dextran in the abluminal medium was measured at 1, 2, and 4, and  
515 24 h during reperfusion. A 50  $\mu$ L of samples from the abluminal side were collected at indicated  
516 time points. An equal volume of fresh medium was replaced to maintain the sink conditions. The  
517 concentration of TRITC-Dextran was measured using Synergy HTX multimode plate reader at  
518 excitation 485/20 and emission 580/50 nm. The diffusion rate of TRITC-Dextran at each time  
519 point was calculated as the amount of TRITC-Dextran present in the basolateral compartment  
520 per unit surface area of the insert per unit time.

521 *Diffusion rate of TRITC – Dextran =*

$$522 \frac{\text{Amount of TRITC-Dextran in basolateral compartment}}{(\text{Surface area of transwell insert}) \times (\text{time at which basolateral sample was removed})} \quad (\text{Equation 2})$$

523

## 524 **2.15. Statistical analysis**

525 Statistically significance among the mean of controls and treatment groups or within  
526 treatment groups were analyzed using one-way analysis of variance (ANOVA) or two-way  
527 ANOVA at 95% confidence intervals using GraphPad Prism 9 (GraphPad Software, LLC). The  
528 notations for the different levels of significance are indicated as follows: \* $p < 0.05$ , \*\* $p < 0.01$ ,  
529 \*\*\* $p < 0.001$ , \*\*\*\* $p < 0.0001$ .

530

531

532 **3. Results**

533 **3.1. EVs retained their physicochemical characteristics and membrane integrity upon**

534 **revival from storage conditions.** We jointly refer EXOs and MVs as EVs wherever applicable.

535 We first studied the effect of storage conditions on the retention of physicochemical  
536 characteristics of hCMEC/D3-derived EXOs and MVs using dynamic light scattering (**Fig. 1**).

537 Freshly isolated EXOs and MVs showed particle diameters of about 210 and 265 nm with  
538 dispersity indices ranging from 0.35 to 0.4 (**Fig. 1 a-d**). The average diameter of EXOs

539 significantly ( $p < 0.05$ ) increased after the first freeze-thaw cycle (FT: samples were frozen at -  
540 20°C for 24 h followed and were thawed at room temperature for 30 min), however, there were

541 no significant differences in the particle diameters of EXOs between the fresh sample and after

542 three FT cycles (**Fig. 1a**). Similar to EXOs, MVs retained their particle diameters after three FT

543 cycles with a consistent dispersity index (**Fig. 1b,d**). EXOs and MVs showed an initial negative

544 zeta potential of about -22 mV that ranged between -15 to -30 mV during three consecutive FT

545 cycles (**Fig. 1e,f**). More than 90% of EXOs and MVs (post-freeze-thaw cycles) showed a

546 unimodal particle size distribution in the intensity plot (**Fig. S1**). Nanoparticle tracking analysis

547 was also performed to measure particle diameter and concentration of freshly isolated EVs. The

548 number-weighted mean diameters of EXOs and MVs were about 157 and 146 nm, respectively

549 (**Fig. 1i**). The concentration of freshly isolated EXOs and MVs was ranged from 4.6 to  $5.1 \times 10^8$

550 particles per milliliter (**Fig. 1i**).

551

552 The membrane integrity of EVs during their storage conditions was determined using a

553 previously reported calcein-based flow cytometry assay (28) that allows distinguishing the

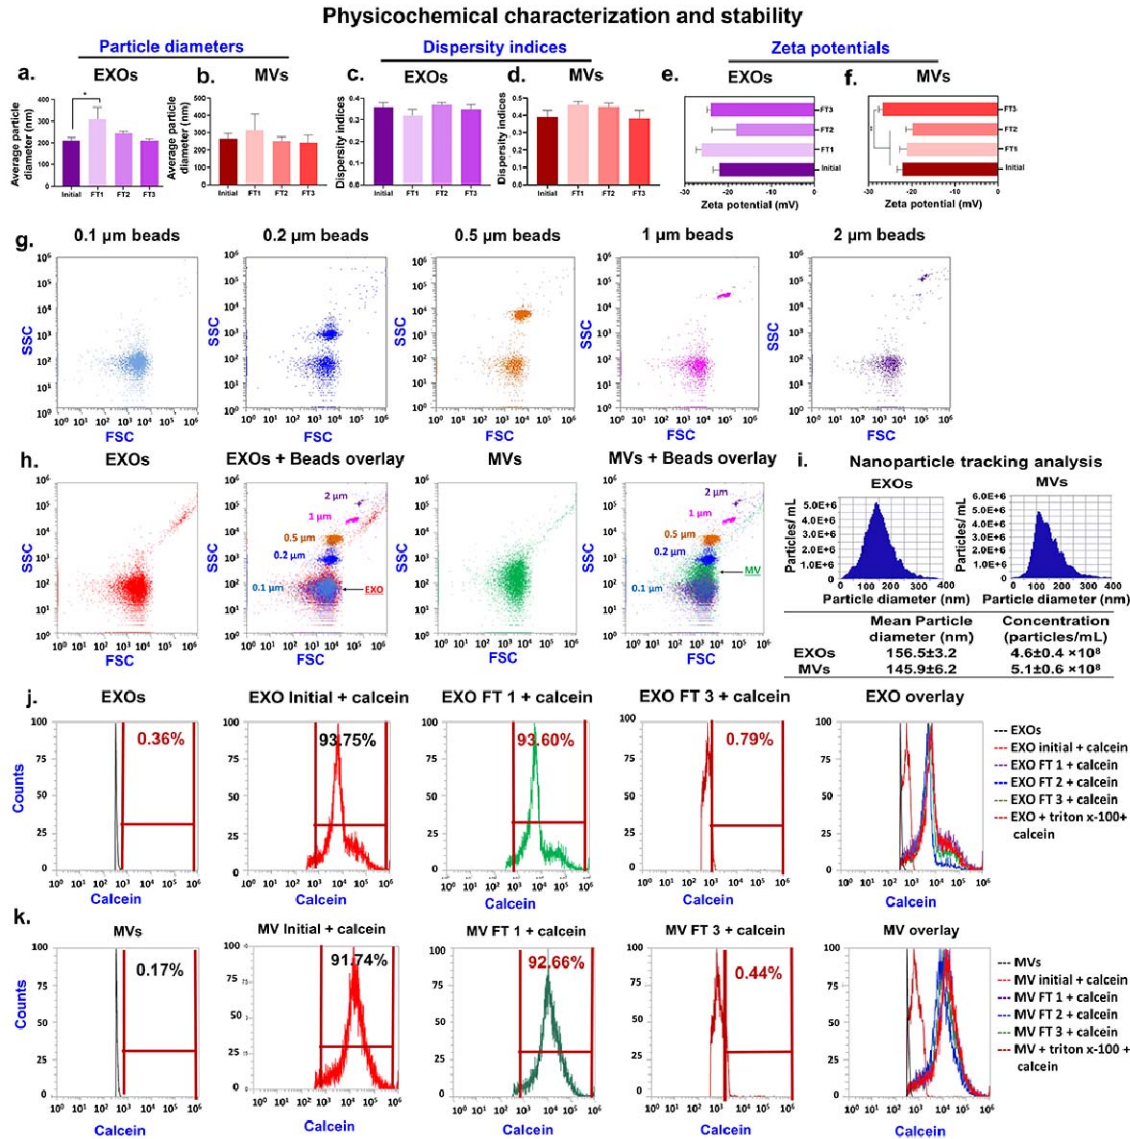

**Fig. 1. Physicochemical characteristics and stability of EVs during storage conditions.**

Average particle diameters (a,b), and dispersity indices (c,d), and zeta potentials (e,f) of hCMC/D3 cell line-derived EVs after three freeze-thaw (FT) cycles were determined using dynamic light scattering on a Malvern Zetasizer Pro-Red. Freshly-isolated samples (Initial) were used as controls. Samples were diluted to 0.5 mg protein/mL in 1x PBS for particle diameter and 10 mM HEPES buffer pH 7.4 for zeta potential measurements. The samples were stored at -20°C for 24 h and thawed at room temperature for 30 min prior to analysis. Data are presented as mean±SD of n=3 measurements. \* p<0.05. The particle counts of polystyrene calibration beads, EXOs, and MVs were captured in forward scatter (FSC), side scatter (SSC) plots using Attune NxT flow cytometer (g,h). (i) EV particle diameter and concentration measurement using nanoparticle tracking analysis. The histograms of calcein-positive events of intact EXOs (j) and MVs (k) post-three FT cycles were detected using a small particle side scatter 488/10-nm filter in an Attune flow cytometer. Unstained EVs were used to gate the histograms for estimating percentage calcein-positive counts.

554 fraction of intact vs. disrupted vesicles based on the number of calcein-positive events in density

555 and histogram plots (**Fig. 1g-h, j-k**). Prior to analyzing the EVs, we first calibrated the flow  
556 cytometer using polystyrene beads of particle diameters ranging from 0.1 to 2  $\mu\text{m}$  using a small  
557 particle side scatter filter (488/10 nm, BL1) (**Fig. 1g**). The relative position of EV clusters in the  
558 FSC/SSC overlay plots was directly proportional to the particle diameter since an increase in  
559 diameter showed a right-upward shift of the clusters. Notably, EXO and MV clusters overlapped  
560 to a large extent in the area corresponding to 0.1-0.2  $\mu\text{m}$  bead diameters suggesting that this flow  
561 cytometry method allowed us to detect EV-sized particles (**Fig. 1h**). The particle counts for  
562 PBS/calcein AM, unlabeled-EXOs and MVs, PBS/Triton X-100/calcein AM mixture (sample  
563 processing controls) were acquired on SSC/BL1 density plots. Gates were created on the  
564 histogram and density plots to (1) distinguish the non-specific/background signals from PBS,  
565 calcein AM, and Triton X-100, and (2) measure the signal intensities of calcein-labeled EVs.  
566 About 90% of EXOs and MVs in freshly-isolated EV samples were calcein-positive suggesting  
567 that the EVs retained intact membranes after the ultracentrifugation and resuspension process  
568 (**Fig. 1j-k**). Importantly, >85-90% EXOs and MVs remained their membrane integrity after three  
569 consecutive freeze-thaw cycles confirming the lack of significant membrane damage during and  
570 upon revival from storage conditions. In addition, EVs lysed with Triton X-100 showed less than  
571 10% calcein-positive particle counts demonstrating the specificity of calcein signal intensities  
572 associated with the intact EVs.

573

574 **3.2 MVs contain mitochondria and transfer their mitochondrial load to recipient**  
575 **primary HBMECs and hCMEC/D3 cells.** We studied the morphology of naïve EXOs and  
576 MVs isolated from hCMEC/D3 cells using transmission electron microscopy (TEM). TEM  
577 analysis of negatively-stained EVs showed nearly spherical EXOs of about 50 nm (**Fig. 2a**)

578 whereas MVs were ca. 200 nm structures (**Fig. 2b**). TEM images of sectioned EXOs showed

579 vesicles with particle diameters ranging from 20-100 nm and heterogeneous shapes (**Fig. 2c-e**).  
580 The core of EXOs appeared less dense and transparent suggesting that the core of EXOs may not  
581 contain organelles like mitochondria and may instead contain cytosolic components. TEM

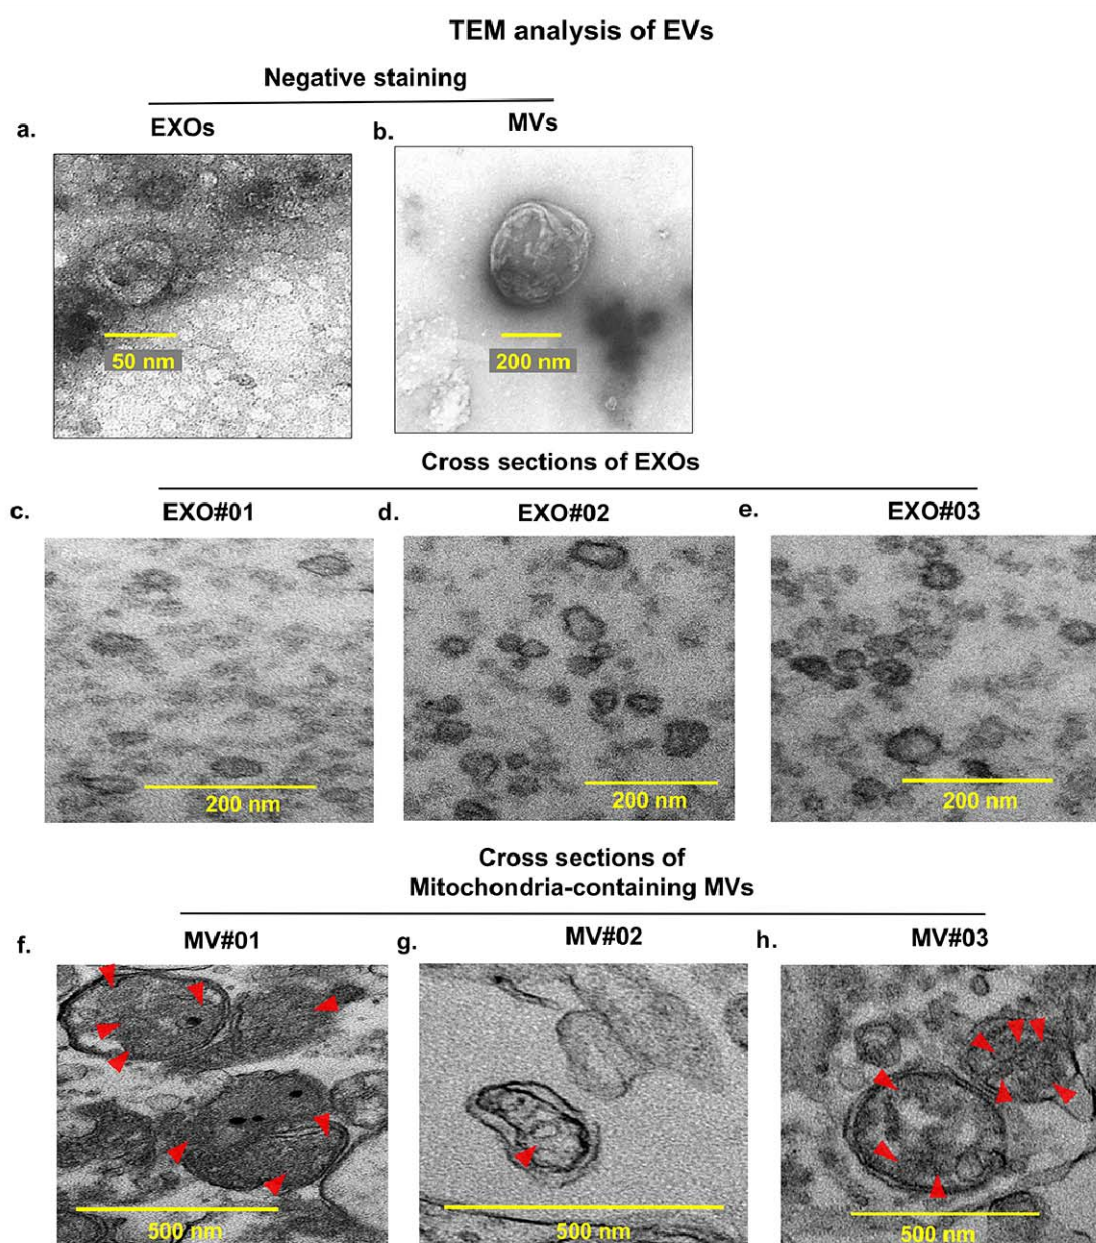

**Fig 2. Transmission Electron Microscopy (TEM) analysis of EVs.** (a,b) Negative stain TEM images of hCMC/D3-derived EXOs (a) and MVs (b). (c-e) TEM images of sectioned EXOs and MVs (f-h). MVs show mitochondria.



582 images of sectioned MVs showed particle diameters ranging from about 150- 500 nm and  
583 heterogeneous shapes (**Fig. 2f-h**). The core of MVs was highly dense and contained  
584 mitochondria (indicated by red arrowheads, **Fig. 2f-h**) ranging from one (**Fig. 2g**) to as many as  
585 five (**Fig. 2f,h**) mitochondria per MV. The presence of mitochondria in MVs was associated with  
586 the presence of mitochondrial cristae-like structures. It should be noted that a large number of  
587 MVs contained one/more mitochondria suggesting consistent incorporation of mitochondria in  
588 hCMEC/D3-derived MVs. Mitochondrial incorporation into MVs, but not EXOs may be  
589 explained by the fact that mitochondria undergo a series of dynamic changes, including  
590 biogenesis, shape changes, and selective degradation and rapidly transport along with cell bodies  
591 to extremities (37), and may subsequently be released via MVs.

592

593 Next, we wanted to determine if EVs can transfer their mitochondrial load into recipient  
594 HBMECs (**Fig 3a,b**). Therefore, we isolated EXOs and MVs from hCMEC/D3 cells pre-stained  
595 with Mitotracker Red (MitoT-red). Donor hCMEC/D3 cells were treated with MitoT-red-EXOs  
596 and MitoT-red-MVs at 30 to 150  $\mu$ g EV protein/well for 72 h and MitoT-red signals in the  
597 recipient hCMEC/D3 cells were measured using flow cytometry. The intensity of MitoT-red-  
598 EVs in the recipient HBMECs (**Fig. 3a,b**) was analyzed using histogram plots. Untreated  
599 HBMECs cells were used as control and were gated for data analysis (**Fig. 3a,b**). Cells pre-  
600 stained with MitoT-red were used as a positive control and showed about 82% MitoT signals  
601 suggesting the presence of polarized mitochondria (**Fig. 3a,b**). Cells treated with unstained MVs  
602 did not show any MitoT-red signals in hCMEC/D3 cells suggesting the absence of non-specific  
603 MitoT signals (**Fig. 3a**). Cells treated with MitoT-red-MV at a low dose of 10  $\mu$ g dose showed  
604 about 32% MitoT-positive signals suggesting efficient mitochondrial transfer into the recipient

605 HBMECs cells (**Fig. 3a,c**). The fraction of cells showing Mito-T-+ve signals increased from

606 61% at 75  $\mu\text{g}$  to 68% at 150  $\mu\text{g}$  MV dose (**Fig. 3a,c**). EXOs at lower doses of 30 and 75  $\mu\text{g}$   
 607 protein per well showed <5% of mitochondrial transfer which was increased to only about 13%  
 608 at 150  $\mu\text{g}$  dose (**Fig. 3b,c**). Cells treated with EV (EXO: MV 1:1) at 75  $\mu\text{g}$  EV protein showed  
 609 about 54% MitoT-red signal intensity suggesting that inclusion of MVs in the EV mixture  
 610 treatment increased mitochondrial transfer in hCMEC/D3 cells (**Fig. 3b,c**). As expected, MVs

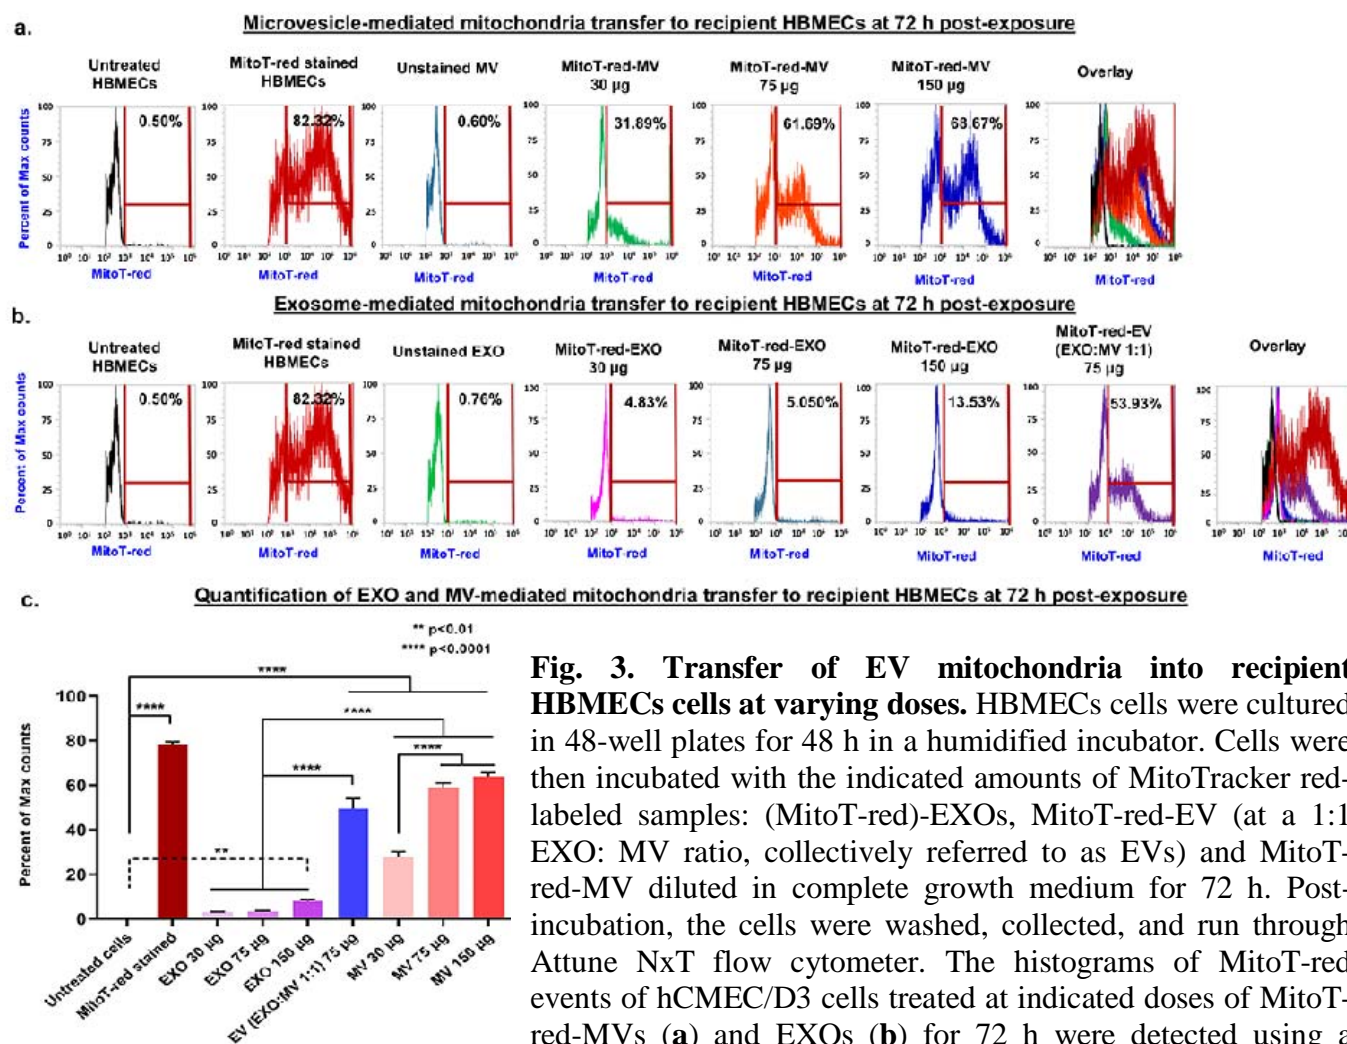

**Fig. 3. Transfer of EV mitochondria into recipient HBMECs cells at varying doses.** HBMECs cells were cultured in 48-well plates for 48 h in a humidified incubator. Cells were then incubated with the indicated amounts of MitoTracker red-labeled samples: (MitoT-red)-EXOs, MitoT-red-EV (at a 1:1 EXO: MV ratio, collectively referred to as EVs) and MitoT-red-MV diluted in complete growth medium for 72 h. Post-incubation, the cells were washed, collected, and run through Attune NxT flow cytometer. The histograms of MitoT-red events of hCMEC/D3 cells treated at indicated doses of MitoT-red-MVs (**a**) and EXOs (**b**) for 72 h were detected using a 674/10-nm side scatter filter in an Attune flow cytometer. Unstained EVs were used to gate the histograms for estimating percentage MitoT-red-positive counts. (**c**) Quantification of EXO and MV-mediated mitochondria transfer in recipient HBMECs at 72 h post-exposure. Data represent mean $\pm$ SD of n=3.

611 showed a greater transfer of mitochondria into recipient HBMECs compared to EXOs consistent  
612 with the presence of notable mitochondrial load in MVs compared to EXOs (**Fig. 2c-h**).

613  
614 We also studied EV-mediated mitochondrial transfer in recipient hCMEC/D3 cells (**Fig. S2**).  
615 Consistent with HBMECs, hCMEC/D3 cells treated with MitoT-red-MV showed a dose-  
616 dependent increase in mitochondrial transfer from 48% at 30  $\mu$ g to 68% at 150  $\mu$ g dose (**Fig.**  
617 **S2a**). We noted a dose-dependent increase in the mitochondrial transfer that increased from 13%  
618 at 30  $\mu$ g EXO to about 33% at the 150- $\mu$ g dose (**Fig. S2b**). EXO-mediated mitochondrial  
619 transfer in hCMEC/D3 cells was comparatively greater than primary HBMECs (**Fig. 3b and Fig.**  
620 **S2b**).

621  
622 **3.3. EVs transferred polarized mitochondria to recipient primary human brain**  
623 **endothelial cells (HBMECs).** EVs are known to contain functional mitochondria, mitochondrial  
624 proteins, and mtDNA along with their vesicular content of lipids, nucleic acid, and proteins (38,  
625 39). We hypothesized that mitochondrial load in naïve EVs can be internalized into and  
626 subsequently integrate with the mitochondrial network of the recipient endothelial cells. We first  
627 determined the uptake of EV-associated mitochondria in recipient primary HBMECs and  
628 hCMEC/D3 cells. The recipient HBMECs or hCMEC/D3 cells were treated with Mitotracker  
629 red-stained EVs (MitoT-red-EV) for 72 h prior to observing under an epifluorescence  
630 microscope. Prior to evaluating the uptake of MitoT-red-EVs, we evaluated the  
631 cytocompatibility of hCMEC/D3 cells treated with MitoT-red-EXOs and MitoT-red-MVs at  
632 different EV protein doses for 72 h and doses of 50  $\mu$ g EV protein/well were well-tolerated by

633 the cells (**Fig. S3**). No MitoT-red-associated signals were observed in unstained/untreated  
634 primary HBMECs  
635

636

**Fig. 4. Transfer of EV mitochondrial load into the recipient HBMEC at varying doses and incubation times.** (a) HBMECs were cultured in 96-well plates until 80% confluency in a humidified incubator. Cells were then incubated with the indicated amounts of MitoTracker red-labeled samples: (MitoT-red)-EXO, MitoT-red-EV (at a 1:1 EXO: MV ratio, collectively referred to as EVs), MitoT-red-MV diluted in complete growth medium for 24, 48, and 72 h. Post-incubation, the cells were washed and incubated with phenol-red-free growth medium. Intracellular MitoT-red-EXO/EXO+MV/MV signals were observed under an Olympus IX 73 epifluorescent inverted microscope using Cy5 channel (purple puncta) at 20x magnification. Scale bar: 50  $\mu$ m. (b) **Quantification of MitoT-red-EV uptake.** HBMECs were treated with the indicated samples and doses for 24, 48, and 72 h. At each time point, from each control and treatment group, at least three images were acquired and the total sum of grayscale signal intensities in the Cy5 channel were estimated using Olympus CellSens software. The measured intensities were normalized with those of the untreated cells.

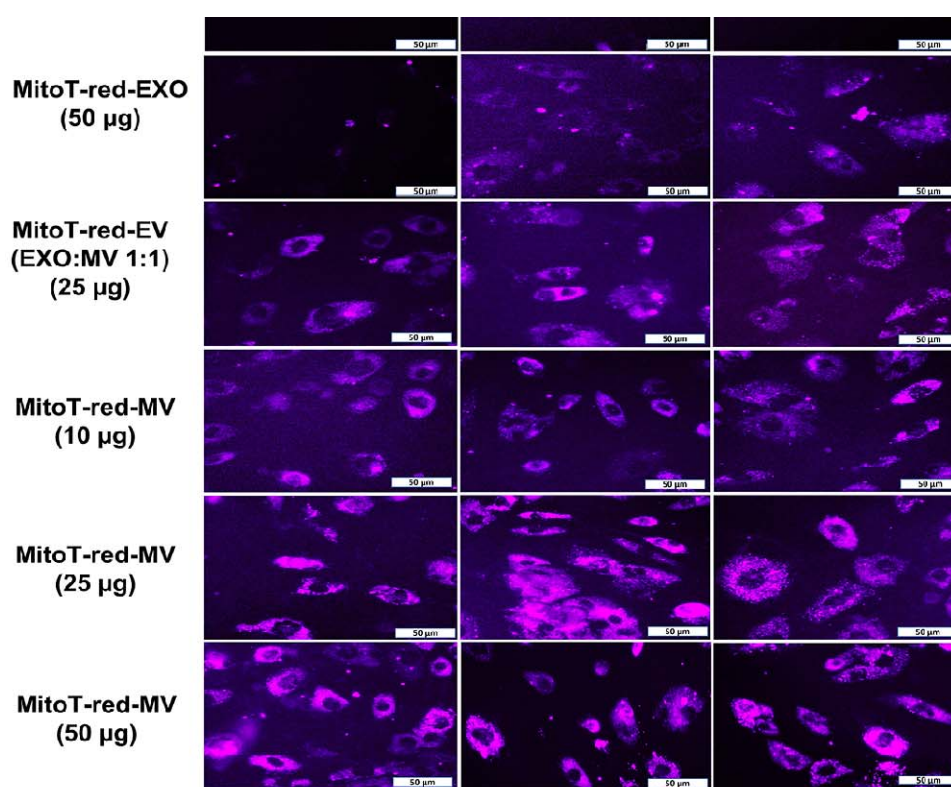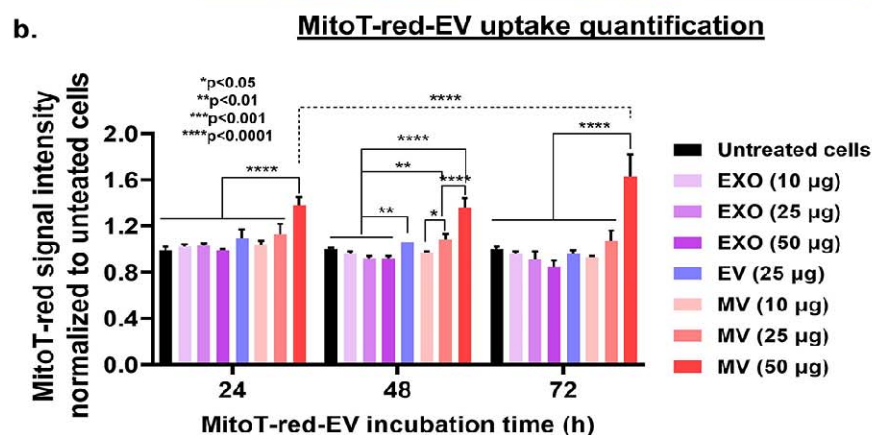

637 **4a**). MitoT-red-EXOs at 10 and 25  $\mu\text{g}$  doses did not show positive signals in HBMECs for 48 h,  
638 however, MitoT-red-EXOs at 50  $\mu\text{g}$  doses showed faint intracellular Cy5 signals at 48 and 72 h  
639 suggesting low levels of mitochondrial uptake after 48 h (**Fig. 4a**). In contrast, strong intracellular  
640 signals in HBMECs treated with MitoT-EXOs+MVs at the 25  $\mu\text{g}$  (**Fig. 4a**) dose suggested that  
641 the inclusion of microvesicles in the EV mixture led to an efficient uptake of polarized  
642 mitochondria into HBMECs. Moreover, the increase in EXO+MV-mediated mitochondrial  
643 transfer was statistically significant ( $p<0.01$ ) at 48 h compared to EXOs alone (**Fig. 4b**).

644  
645 Interestingly, MitoT-red-MVs at a dose as low as 10  $\mu\text{g}$  showed efficient uptake in HBMECs  
646 72 h post-exposure. The levels of uptake increased significantly ( $p<0.0001$ ) as the dose of  
647 MitoT-red-MVs increased from 10 to 50  $\mu\text{g}$  at 48 h (**Fig. 4a,b**). The superior transfer of MV-  
648 mediated mitochondria into HBMECs is likely due to a greater enrichment of functional  
649 mitochondria with a full complement of mitochondrial proteins in MVs compared to EXOs.  
650 Therefore, it can be expected that MVs may increase the cellular bioenergetics of the recipient  
651 cells at lower doses compared to EXOs. We further confirmed the effect of dose and type of EV  
652 subtype (MVs vs. EXOs) on the transfer of mitochondria into hCMEC/D3 cells (**Fig. S4a**).  
653 Similar to the observations noted in the primary HBMEC cultures at 72 h post-exposure, EXOs  
654 at 50  $\mu\text{g}$  protein/well showed faint MitoT-red+ signals in the recipient hCMEC/D3 cells, whereas  
655 cells treated with MVs showed a dose-dependent increase ( $p<0.01$ ) in mitochondrial transfer  
656 compared to EXO-treated endothelial cells (**Fig. S4a,b**).

657  
658 **3.4. EV-transferred mitochondria integrated with the mitochondrial network in the**  
659 **recipient endothelial cells**

660 We wanted to determine if the EV-mediated transfer of mitochondria integrated with the  
661 mitochondrial of the recipient cells. We isolated MitoT-red-stained polarized mitochondria from  
662 the donor cells as we did earlier in section 3.3. and the recipient cell mitochondria were stained  
663 using Mitotracker green (MitoT-green) and the overlap of these fluorescent signals was observed  
664 under an epifluorescent microscope. HBMECs and hCMEC/D3 cells pre-stained with  
665 Mitotracker green were incubated with MitoT-red-EXOs and MitoT-red-MVs at 10, 25, and 50  
666  $\mu\text{g}$  doses for 72 h. Cytosolic, diffuse MitoT-green signals were observed under the GFP channel  
667 whereas punctate MitoT-red EV signals were captured under the Cy5 channel (purple puncta).  
668 The pre-staining of HBMECs with Mitotracker green resulted in robust fluorescent signals for 72  
669 h and incubation with Mitrotracker red-stained EVs did not affect the Mitotracker green  
670 fluorescence intensities.

671  
672 The absence of GFP and Cy5 signals in untreated cells suggested the absence of non-specific  
673 signals at respective channel settings (**Fig. 5**). The cells pre-stained with MitoT-green alone  
674 showed green cytosolic signals associated with recipient mitochondria (**Fig. 5**). MitoT-red-MVs  
675 showed the greater intensity of Cy5 signals at all the tested doses compared to MitoT-red-EXOs,



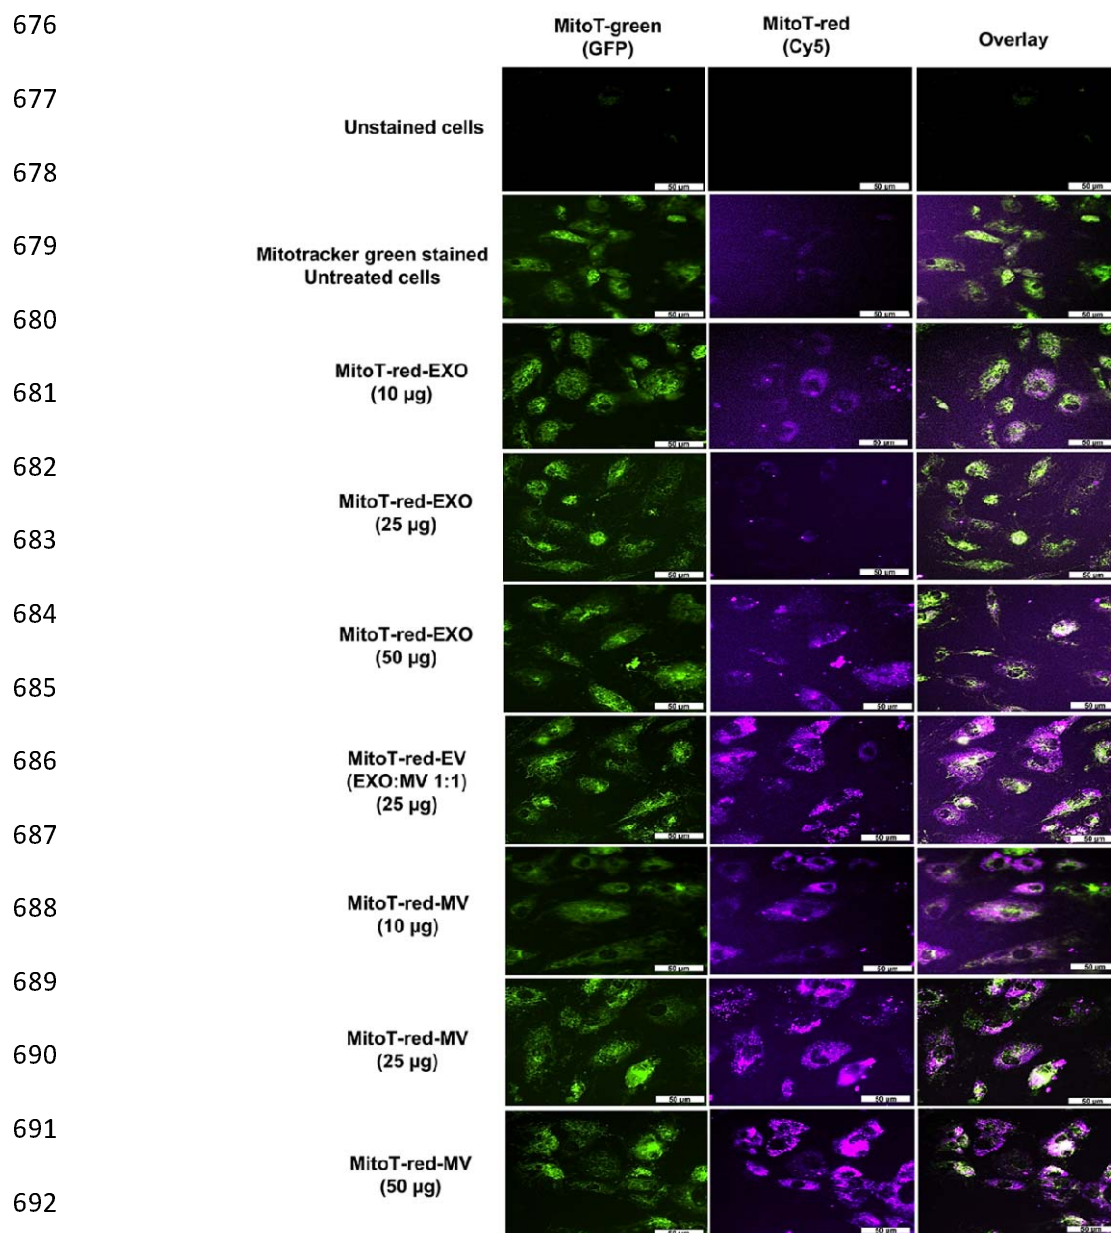

**Fig. 5. Colocalization of EV mitochondrial load with the recipient HBMEC mitochondria.** HBMECs were cultured in 96-well plates until 80% confluency in a humidified incubator. HBMECs were stained with Mitotracker Green for 30 min. Post-staining, the cells were washed and treated with the indicated doses of MitoT-red-EXOs, MitoT-red-EVs (at a 1:1 EXO: MV ratio, collectively referred to as EVs), and MitoT-red-MVs for 72 h. Untreated cells and cells stained with MitoTracker Green only were used as controls. Post-incubation, the treatment mixture was replaced with phenol-red-free growth medium. The Mitotracker green staining in recipient HBMEC was acquired using the GFP channel, whereas the purple fluorescence associated with EV-transferred mitochondrial load was captured using Cy5 channel in an Olympus IX 73 epifluorescent inverted microscope. Colocalization of the mitochondrial signals was confirmed by the presence of yellow signals

693 once again demonstrating that MVs contain a greater mitochondrial load that efficiently integrate  
694 with the recipient cell's mitochondrial network compared to EXOs (**Fig. 5**). The overlay images  
695 of recipient HBMEC mitochondria and EV-associated polarized mitochondria in the MV-treated

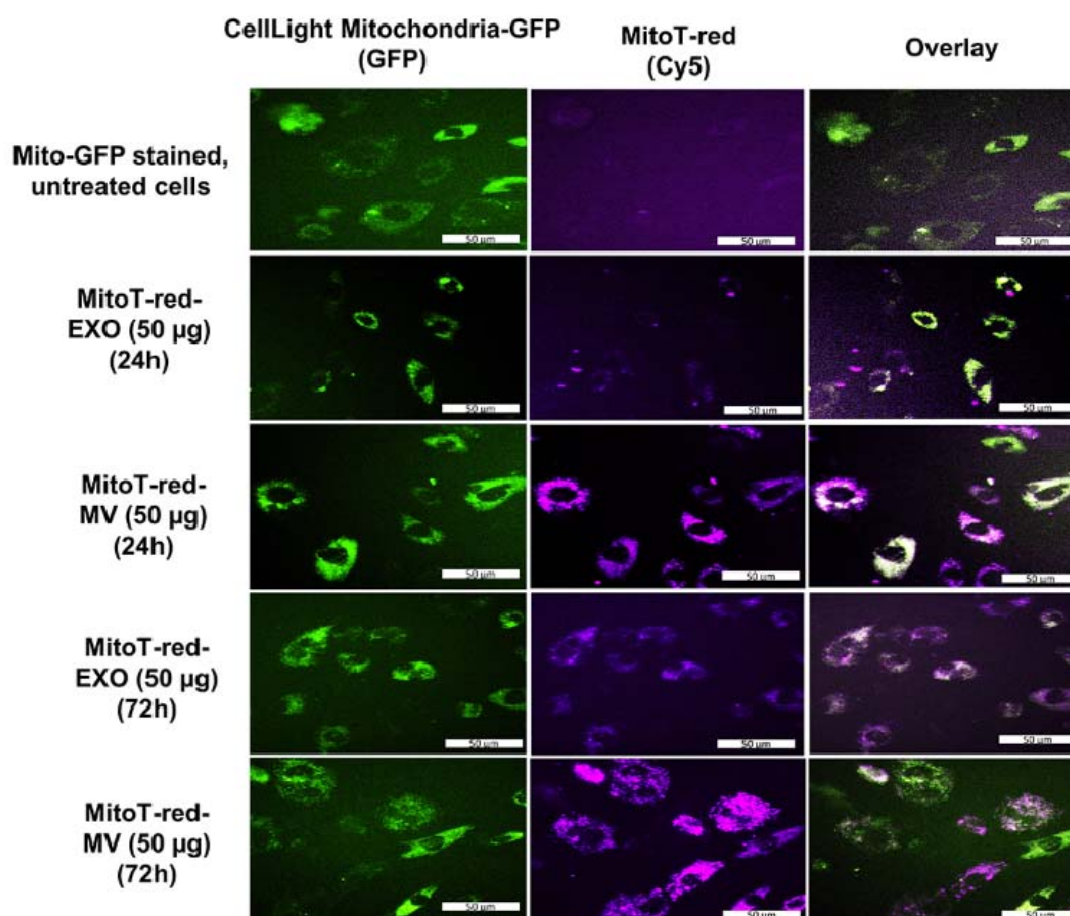

**Fig. 6. Colocalization of EV mitochondrial load with the recipient HBMEC mitochondria using CellLight Mitochondria-GFP BacMam technique.** Confluent HBMECs were transduced with CellLight Mitochondria-GFP at  $2\mu\text{L}/10,000$  cells for 16-18 h. The transduction mixture was then removed, cells were washed, and treated with a complete growth medium containing MitoT-red-EXO and MV at  $50\mu\text{g}/\text{well}$  for 24 and 72 h. Untreated cells and cells treated only with CellLight Mitochondria-GFP were used as controls. The green fluorescence associated with CellLight Mitochondria-GFP in recipient HBMECs was acquired using the GFP channel, whereas the purple fluorescence associated with polarized mitochondria from MitoT-red EXO and MV was captured using Cy5 channel using an Olympus IX 73 epifluorescent inverted microscope. Scale bar:  $50\mu\text{m}$ .

696 cells showed considerably higher colocalization compared to EXO-treated cells (**Fig. 5**). The  
697 Pearson's correlation coefficient of GFP and Cy5 channel intensities demonstrated that EXO-

698 and MV- exposure resulted in a dose-dependent increase in colocalization (at least  $p < 0.05$ ),  
699 where MV exposure showed statistically significant ( $p < 0.0001$ ) and a greater degree of  
700 mitochondria colocalization compared to EXOs (**Fig. S5**). Similar to the primary HBMEC  
701 cultures, hCMEC/D3 cells pre-stained with Mitotracker green and treated with MitoT-red-MV  
702 showed a greater degree of colocalization indicated by the overlap of MitoT-green and MitoT-  
703 red compared to EXO-treated cells (**Fig. S6**).

704  
705 We further confirmed the integration of EV-mitochondrial components with mitochondria of  
706 the recipient cells using an orthogonal technique that allowed us to confirm that the EV-  
707 transferred mitochondria (functional, polarized mitochondria) integrated with the structural  
708 protein-stained mitochondria in the recipient cells. CellLight Mitochondria-GFP BacMam is a  
709 fusion construct of  $\alpha$ -pyruvate dehydrogenase (a mitochondrial matrix protein) and emGFP  
710 packaged in a baculoviral vector that allows specific tagging of a structural mitochondrial protein  
711 (40). HBMECs and hCMEC/D3 cells were first transduced with CellLight Mitochondria-GFP  
712 (CellLight-MitoGFP) before MitoT-red-EV treatment. Despite the low absolute frequency of  
713 transduction (40), the recipient endothelial cells showed a strong GFP fluorescence suggesting  
714 that CellLight-MitoGFP transduction effectively tagged the alpha pyruvate structural  
715 mitochondrial protein in HBMECs (**Fig. 6**) and hCMEC/D3 (**Fig. S7**) cells. Similar to Figure 5,  
716 MitoT-red-MV at a dose of 50  $\mu\text{g}$  showed efficient transfer of mitochondria (purple puncta) in  
717 the recipient HBMECs and hCMEC/D3 cells. The EV MitoT-red puncta signals colocalized with  
718 recipient mitochondria (CellLight-MitoGFP) 72 h post-exposure. Notably, cells exposed to  
719 MitoT-red MV showed greater Cy5 signals compared to MitoT-red-EXO-treated cells  
720 confirming again that MVs contain a greater level of mitochondrial load compared to EXOs. The

721 Cy5 signal intensity in MV-treated cells was considerably increased at 72 h post-exposure  
722 compared to the 24 h time point suggesting that 72 h is an optimal exposure period for MV  
723 internalization into the recipient HBMEC and hCMEC/D3 cultures (**Fig. 6 and S7**). Importantly,  
724 the overlap of the structural protein-tagged recipient cell mitochondria with the functional  
725 MitoT-red-stained MVs indicates that the MV-delivered mitochondria undergo fusion with the  
726 recipient cell mitochondria. In conclusion, our data collectively demonstrate that microvesicles  
727 contained a greater mitochondrial load compared to exosomes and the MV-associated  
728 mitochondria integrate with the mitochondrial network in the recipient human brain endothelial  
729 cells. MV-mediated mitochondrial transfer increased with increasing doses of MVs and the  
730 greatest colocalization with the recipient endothelial cells was observed at a 50- $\mu$ g dose and 72 h  
731 incubation time.

732

### 3.5. Naïve EVs increased HBMEC ATP levels under normoxic and hypoxic conditions.

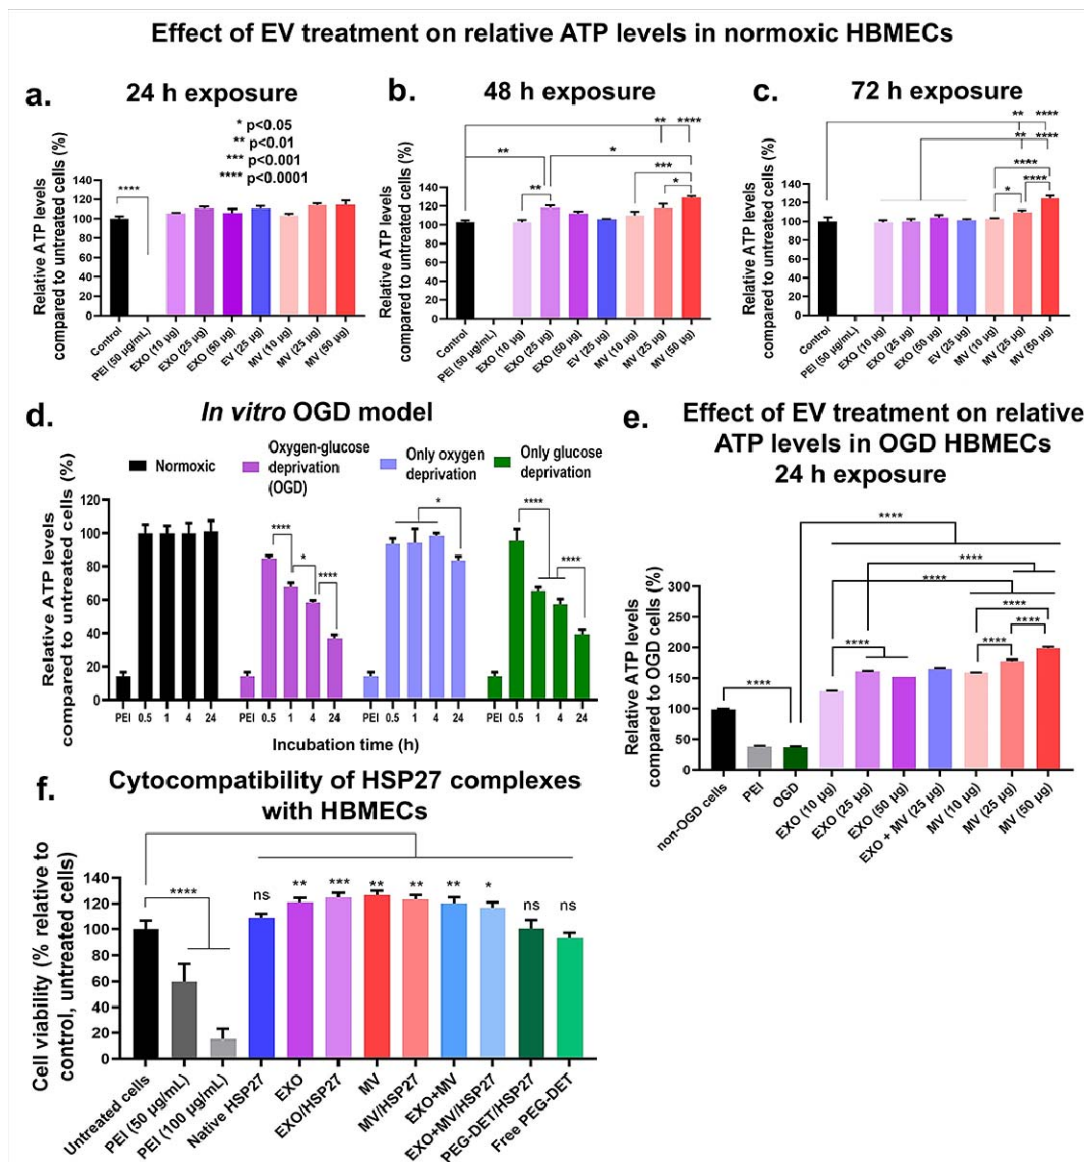

**Fig. 7. EV-mediated increase in HBMEC ATP levels during normoxic and hypoxic conditions and cytocompatibility of polymer/HSP27 complexes with HBMEC.** HBMEC cells were cultured in the 96-well plates until 80% confluency in a humidified incubator. (a-c) Confluent monolayers were treated with EXOs, MVs, and EVs (EXO: MV 1:1) at the indicated amounts for 24 (a), 48 (b), and 72h (c). Polyethyleneimine, PEI, at 50 µg/mL was used as a positive control for the ATP assay. Post-treatment, cells were incubated with a 1:1 mixture of fresh growth medium and Cell titer Glo reagent. The relative luminescence units (RLU) of the samples were measured using a SYNERGY HTX multimode plate reader at 1s integration time. Relative ATP levels were calculated by normalizing the RLU of treatment groups to the RLU of control, untreated cells. (d) Confluent normoxic HBMEC monolayers were treated with OGD medium and incubated in a hypoxic Billups-Rothenberg chamber at 37°C for 24 h. The following groups were also included: Normoxic HBMECs cultured in complete growth medium in a humidified incubator, oxygen-deprived cells cultured in complete growth medium in a hypoxic chamber, glucose-deprived cells cultured in OGD medium in a normoxic chamber. The cell viability of normoxic HBMECs was used as a control to calculate the cell viability in all treatment conditions. (e) Confluent HBMECs were treated with the indicated doses of EXOs and MVs in OGD medium and cell viability was measured 24 h post-treatment while untreated cells were used as a control. (f) Normoxic confluent HBMECs were treated with the indicated samples at a dose of 2 µg of HSP27 per well for 72 h before measuring cell viability. Data represent mean ±SD (n=3). \* p<0.05, \*\* p<0.01, \*\*\* p<0.001, \*\*\*\* p<0.0001

733 The effect of hCMEC/D3-derived EVs on the ATP levels in recipient primary HBMECs were  
734 evaluated under normoxic conditions using an ATP assay. Primary HBMEC monolayers were  
735 treated with EXOs and MVs at 10, 25, and 50 µg EV protein per well for 24, 48, and 72 h. **Fig**  
736 **7a** shows that the increase in HBMEC ATP levels upon EXOs and MVs treatment for 24 h was  
737 not statistically significant (p>0.05). Importantly, HBMECs treated at a dose of 25 µg EXOs for  
738 48 h exposure showed a significant (p<0.01) increase in ATP levels compared to untreated cells.  
739 Interestingly, cells treated with MVs at 25 and 50 µg doses showed a dose-dependent and  
740 significant (p<0.0001) increase in relative ATP levels compared to untreated cells. In addition,  
741 the MV-mediated increase in ATP levels was significantly (p<0.05) higher compared to EXOs  
742 after 48 h exposure (**Fig. 7b**). At 72 h post-exposure, MVs at 25 and 50 µg doses showed a dose-  
743 dependent and significant (p<0.01) increase in relative ATP levels compared to untreated cells  
744 under normoxic conditions (**Fig. 7c**). In contrast, EXOs did not show any significant increase in  
745 relative HBMEC ATP levels compared to the control. In addition, MV-treated HBMECs showed

746 significantly higher ATP levels compared to EXOs at 72 h at all tested doses. The data suggested  
747 that the MV-mediated significant increase in relative ATP levels at 48 h (**Fig. 7b**) and 72 h (**Fig.**  
748 **7c**) may likely be due to their inherent mitochondrial load—including mitochondria,  
749 mitochondrial DNA, and a full complement of mitochondrial proteins.

750  
751 Ischemic conditions were simulated by culturing primary HBMECs under oxygen glucose-  
752 deprived (OGD), only oxygen-deprived, and only glucose-deprived conditions, and the resulting  
753 cell viability was evaluated from 0.5-24 h (**Fig. 7d**). HBMECs treated with complete growth  
754 medium and incubated in a humidified incubator (normoxic conditions) were used as a control  
755 for each time point. OGD HBMECs showed a time-dependent significant ( $p < 0.01$ ) decrease in  
756 cell viability compared to normoxic HBMECs. A four-hour OGD exposure led to about 40% cell  
757 death that further increased to about 60% at 24 h (**Fig. 7d**). Oxygen deprivation alone for 6 h did  
758 not result in a significant ( $p > 0.05$ ) decrease in cell viability, however, it caused nearly 20% cell  
759 death at 24 h. HBMEC cell viability decreased to about 60% during 2-6 h, followed by 50% cell  
760 viability at 24 h of glucose deprivation. To summarize, OGD-exposed HBMECs at 24 h showed  
761 a significant ( $p < 0.0001$ ) and maximum reduction in cell viability compared to other treatment  
762 conditions, therefore, we chose to expose HBMEC under OGD conditions for 24 h to simulate  
763 ischemic conditions for further experiments.

764  
765 We studied whether naïve EXOs and MVs can increase the cell survival of OGD-exposed  
766 primary HBMECs. HBMECs in OGD medium were incubated with EXOs and MVs at 10, 25,  
767 and 50  $\mu\text{g}$  EV protein/well for 24 h. The cell viability of EV-treated HBMEC cells was  
768 compared with untreated HBMECs maintained in OGD medium in a normoxic incubator (**Fig.**

769 **7e)**. EXOs and MVs at all treated doses showed a significant ( $p < 0.0001$ ) increase in cell viability  
770 compared to control, untreated HBMECs (**Fig. 7e**). In addition, an increase in EXO and MV  
771 dose from 10 to 25  $\mu\text{g}$  EV protein/well showed a significant ( $p < 0.0001$ ) increase in ATP levels.  
772 HBMECs treated with MVs at 50  $\mu\text{g}$ /well showed a maximum, ca. five-fold increase in ATP  
773 levels compared to untreated cells. Importantly, MVs showed a significantly ( $p < 0.0001$ ) higher  
774 HBMEC cell survival rate compared to EXOs at the same dose (25 and 50  $\mu\text{g}$ ) suggesting that  
775 MVs outperformed EXOs in increasing HBMEC cellular energetics under ischemic conditions.  
776 We also confirmed that the EV-mediated increase in endothelial cell viability under OGD  
777 conditions in the hCMEC/D3 cell line (**Fig. S8a**). Consistent with primary human brain  
778 endothelial cells, hCMEC/D3 cells treated with EXOs and MVs at 10, 25, and 50  $\mu\text{g}$  EV  
779 protein/well showed about a three to four-fold increase in endothelial ATP levels compared to  
780 ischemic cells under hypoxic conditions. Moreover, the EV-mediated increases in ischemic  
781 hCMEC/D3 cell survival were dose-dependent. Lastly, MV-treated ischemic hCMEC/D3 cells  
782 showed a greater increase in ATP levels compared to EXO-treated cells (**Fig. S8a**).

783  
784 **3.6. EVs increased the oxidative phosphorylation and glycolytic functions of recipient**  
785 **endothelial cells under normoxic and hypoxic conditions.** The mitochondrial function of  
786 hCMEC/D3 cells treated with EVs under normoxic conditions was evaluated using Seahorse  
787 analysis by measuring oxygen consumption rate (OCR). hCMEC/D3 cells were treated with  
788 EXOs and MVs at 3.4, 8.3, and 16.5  $\mu\text{g}$  protein/well in complete growth medium for 24, 48, and  
789 72 h. The basal OCR, maximum OCR, and proton leak at each time point were measured for  
790 hCMEC/D3 cells treated with different doses of EXOs and MVs. Basal and maximum OCR was  
791 not increased in EXO or MV-treated cells compared to untreated cells at 24 and 48 h (**Fig. 8a,b**).



### Effect of EV treatment on mitochondrial function in hCMEC/D3 normoxic cultures

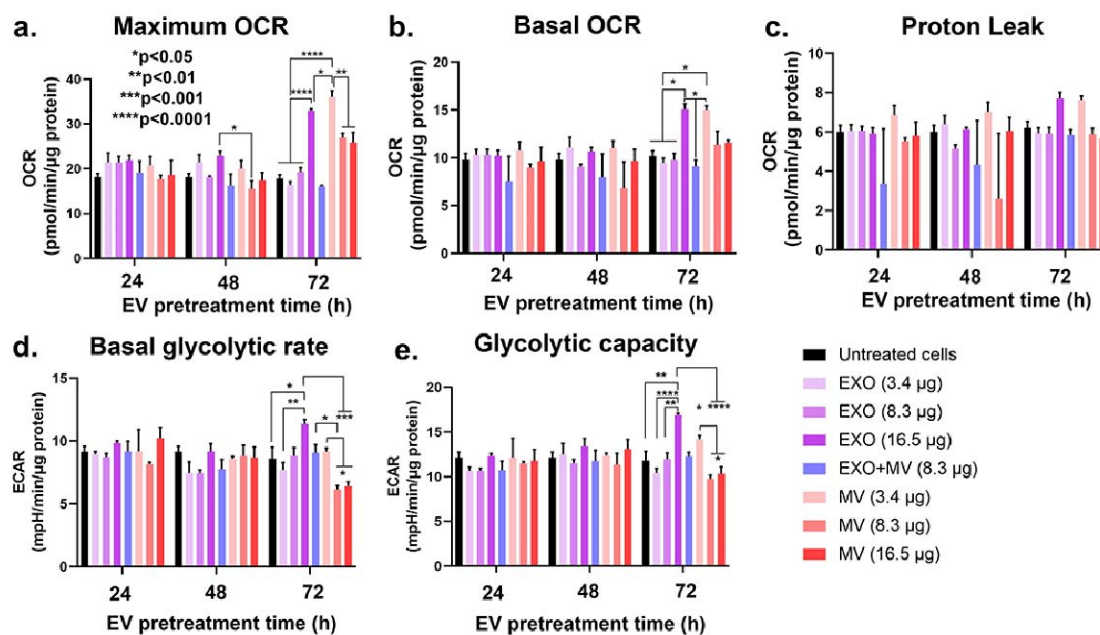

**Fig. 8. Effects of EV exposure on mitochondria function in the recipient human brain endothelial cells under normoxic conditions.** hCMEC/D3 cells were cultured in a Seahorse XF96 plate for 4 days at 20,000 cells/well. EXO, MV, and EV (EXO+MV; 1:1) were diluted in complete growth medium at the indicated doses of  $\mu$ g EV protein/well and cells were incubated in a humidified incubator for 24, 48, and 72 h. Post-treatment at each time point, the medium was replaced with DMEM and maximum oxygen consumption rate (OCR) (a), basal OCR (b), and proton leak (c) were measured using the Seahorse XFe96 analyzer. Basal glycolytic rate (d), and glycolytic capacity (e) were determined by measuring extracellular acidification rate (ECAR). Data represents mean $\pm$ SEM (n=3). \*p<0.05, \*\*p<0.01, \*\*\*p<0.001, \*\*\*\*p<0.0001

792 In contrast, endothelial cells exposed to EXOs and MVs for 72 h showed a dose-dependent,  
 793 significant (p<0.0001) increase in basal and maximum OCR compared to control, untreated cells,  
 794 indicating that it takes 72 h for EV-mediated mitochondrial transfer and resulting increase in  
 795 mitochondrial functions (**Fig. 7a-c and Fig. 4-6**). EXOs at 16.5  $\mu$ g protein/well showed a  
 796 significant (p<0.0001) increase in OCR compared to 3.4 and 8.3  $\mu$ g protein/well EXO doses.  
 797 Besides, MVs at 3.4  $\mu$ g protein/well showed a maximum and significant (p<0.0001) increase in  
 798 OCR compared to higher MV doses, and untreated cells. Importantly, MV-mediated increase in  
 799 OCR was significantly (p<0.05) higher compared to the maximum EXO dose suggesting that

800 MVs outperformed EXOs in increasing the recipient endothelial cells' mitochondrial function  
801 under normoxic conditions. The MV-mediated increase in mitochondrial function was consistent  
802 with the MV-mediated increase in cell viability in ATP assay (**Fig. 7**), intracellular uptake of  
803 MV-associated mitochondria (**Fig. 4**), and the integration of MV-associated mitochondria with  
804 the recipient cell's mitochondrial network (**Fig. 5, 6**). Notably, EV exposure did not affect proton  
805 leak for 72 h under normoxic conditions (**Fig. 8c**).

806

807 We further evaluated the effects of EVs on non-mitochondrial energy generation pathways  
808 such as cytosolic glycolytic capacity in the recipient endothelial cells. Extracellular acidification  
809 rate (ECAR) is a key indicator of cellular glycolysis and can be determined in real-time by  
810 measuring free protons in a Seahorse plate transient microchamber (41). ECAR (basal glycolysis  
811 rate and glycolytic capacity) was measured in hCMEC/D3 cells treated with EXOs, MVs, and  
812 EVs (EXOs+MVs at 1:1 w/w) at 3.4, 8.3, and 16.5  $\mu$ g EV protein/well in complete growth  
813 medium (**Fig. 8d,e**). We did not note any changes in the basal glycolysis rate and glycolytic  
814 capacity of hCMEC/D3 cells pre-treated with EXOs and MVs for 24 and 48 h compared to  
815 untreated cells. However, treatment with 16.5  $\mu$ g EXOs for 72 h showed a significantly ( $p<0.05$ )  
816 greater basal glycolysis rate and glycolytic capacity compared to untreated cells. The glycolysis  
817 rate and glycolytic capacity of hCMEC/D3 cells were significantly ( $p<0.01$ ) increased with an  
818 increase of EXO dose from 3.4 to 16.5  $\mu$ g protein/well. Notably, EXOs outperformed in  
819 increasing glycolysis capacity and basal glycolytic rate compared to MVs.

820

821 The second goal of the present work was to evaluate the effects of HSP27 delivery on tracer  
822 permeability across the BBB in an OGD cell culture model of ischemia/reperfusion injury. We

823 formulated EVs (a cell-derived, natural carrier) and a synthetic cationic polymer, PEG-DET, for  
824 the delivery of exogenous HSP27 protein. Followed by physicochemical characterization of the  
825 formed mixtures/complexes, we evaluated their effects on the paracellular permeability of small  
826 and large molecular mass fluorescent tracers across primary HBMEC monolayers exposed to  
827 OGD.

828

### 829 **3.7. Exogenous HSP27 protein formed complexes with PEG-DET, EVs, and PEG-DET-**

830 **EV mixtures.** The complexation of HSP27 protein with PEG-DET and hCMEC/D3-derived EVs

831 was determined by studying the electrophoretic mobility of HSP27 in a native polyacrylamide

832 gel electrophoresis (PAGE) setup. Native recombinant human HSP27 at the running buffer of pH

833 8.3 carries a net negative charge (estimated charge: -4.2 mV) (42), and therefore, migrated from

834 the loading spot towards the anode during electrophoresis (**Fig. 9a**). First, the complexation

835 efficiency of PEG-DET with HSP27 was studied by comparing the relative changes in HSP27

836 band densities at polymer: protein weight/weight (w/w) ratios ranging from 0.05:1 to 20:1 (**Fig.**

837 **9a,b**). Compared to native HSP27 (100%, **Fig. 9b**), the relative band density of PEG-

838 DET/HSP27 complexes at w/w 0.2:1 was considerably reduced to about 43%. As the w/w ratios

839 increased, there was a gradual and significant decrease in HSP27 band densities (**Fig. 9a,b**). At

840 PEG-DET/HSP27 w/w 10:1 and 20:1, the mean HSP27 band density decreased to nearly 25%

841 suggesting that PEG-DET formed electrostatic complexes with HSP27 at physiological pH. The

842 free polymer did not show any non-specific staining until the 1:1 w/w ratio. Non-specific

843 staining of free PEG-DET polymer was observed in the samples that contained an equivalent

844 quantity polymer at w/w 5 and 10:1.

845

846 To determine if natural nanocarriers such as EVs can be formulated for the delivery of

847 exogenous HSP27, hCMEC/D3 cell-line derived EXOs and MVs were mixed with HSP27 at EV

848 protein/HSP27 protein w/w ratios of 5:1, 10:1, and 15:1 and the electrophoretic mobility of

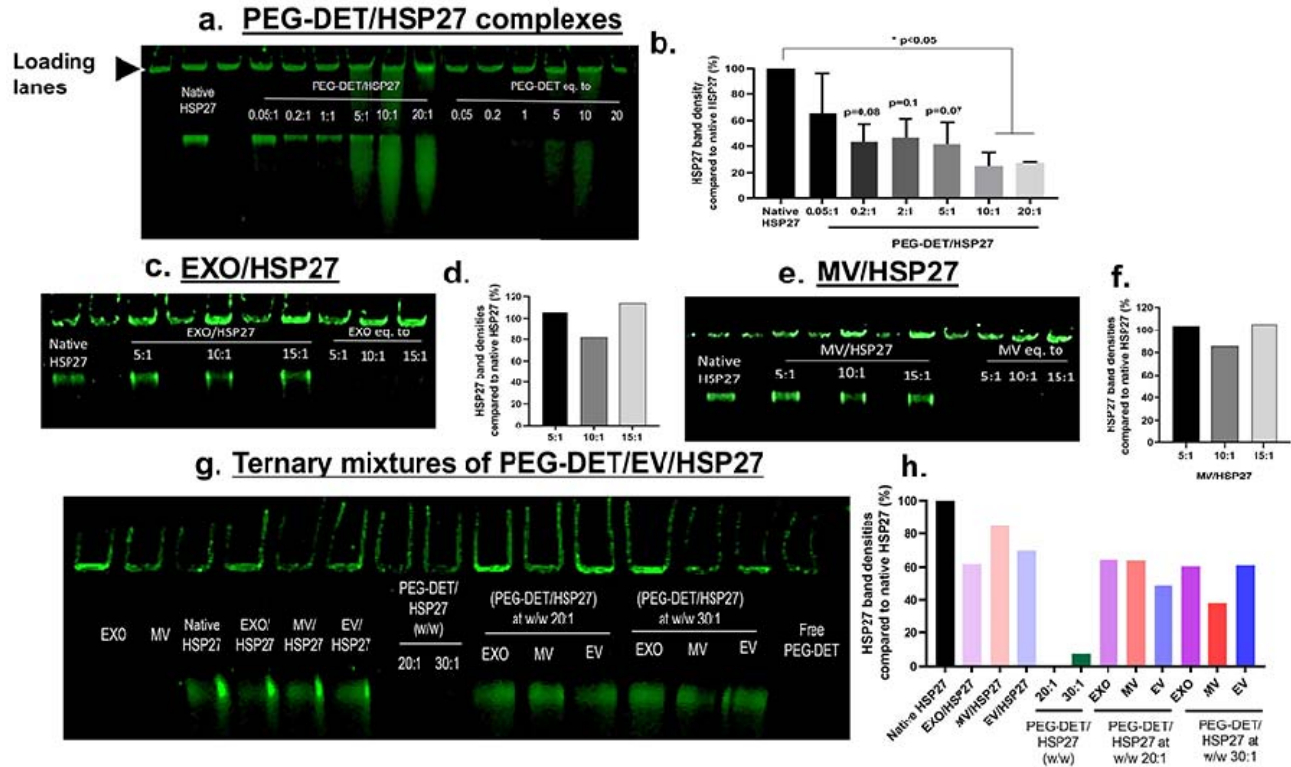

**Fig. 9. Formation of EV- and PEG-DET/HSP27 complexes.** (a) *Native polyacrylamide gel electrophoresis (PAGE) for PEG-DET/HSP27 complexes.* Native HSP27, PEG-DET/HSP27 at indicated weight ratios, and free PEG-DET polymers were mixed with 1x native sample buffer and loaded in an SDS-free 4-10% polyacrylamide gel at 1  $\mu$ g HSP27 per lane. (c,e) *Native PAGE for hCMEC/D3-derived EV/HSP27 complexes: Native HSP27 and mixtures of EXO/HSP27 (c), and MV/HSP27 (e)* at 5, 10, and 15:1 weight/weight (w/w) ratios were loaded in a SDS-free 4-10% polyacrylamide gel at 1  $\mu$ g HSP27 per lane. Free EXOs and MVs equivalent to the amounts in 5:1, 10:1, and 15:1 w/w complexes were used as controls. (g) *native PAGE for (PEG-DET/HSP27)/EV ternary mixtures.* PEG-DET/HSP27 complexes were prepared at 20:1 and 30:1 w/w ratios followed by incubation with 10  $\mu$ g of EVs. The indicated samples were loaded in the gel at 1  $\mu$ g HSP27/lane. Each gel was run at 100 V for 2 h and stained using Biosafe Coomassie G250. The gel was then scanned at 800 nm using an Odyssey imager at intensity setting 5. (b,d,f,h) Densitometry analysis was performed by measuring band densities of HSP27 in the different experimental groups in comparison to the band density of native HSP27 in the respective gel using Image Studio 5.0 software \* $p < 0.05$

849 HSP27 was studied using native PAGE (Fig. 9c-f). Mixtures of HSP27 with hCMEC/D3 cell  
 850 line-derived EXOs and MVs did not affect the migration of HSP27 at all tested weight ratios  
 851 (Fig. 9c,e), however, EXO/HSP27 and MV/HSP27 mixtures at w/w 10:1 showed about a 20%  
 852 reduction in HSP27 band density compared to native HSP27 (Fig. 9d,f). Despite the negative  
 853 surface charges of EV and HSP27 that may result in electrostatic repulsion, the reduction in

854 HSP27 band density at the 10:1 w/w ratio suggested that HSP27 was stabilized by non-ionic/H-H  
855 bond-based interactions with the EVs. It should be noted that free EXOs and MVs equivalent to  
856 different weight ratios (present in the EV/protein mixtures) did not show Coomassie signals  
857 suggesting that EV membrane and intravesicular proteins exerted minimum interference in the  
858 detection of the observed protein bands.

859  
860 We then formulated ternary mixtures of PEG-DET/HSP27 complexes with hCMEC/D3-  
861 derived EVs, and the resulting changes in HSP27 band intensity were studied using native PAGE  
862 followed by densitometry analysis (**Fig. 9g,h**). EXOs, MVs, and EV/HSP27 at w/w 10:1 showed  
863 about 20-40% reduction in band density whereas PEG-DET/HSP27 at w/w 20:1 and 30:1  
864 showed >90% HSP27 complexation compared to native HSP27 (**Fig. 9h**). The HSP27 band  
865 density was decreased by 40-50% when PEG-DET/HSP27 at w/w 20:1 were incubated with 10  
866  $\mu$ g of EXOs, MVs, and EXO+MV 1:1 (EV). The % extent of reduction in HSP27 band density  
867 of (PEG-DET/HSP27)/EV complexes ranged among the values noted in the case of PEG-  
868 DET/HSP27 and EV/HSP27 complexes suggesting the competitive binding of negatively-  
869 charged EVs and HSP27 with the positively charged PEG-DET. Besides, increasing the relative  
870 amounts of PEG-DET in (PEG-DET/HSP27)/EV complexes further reduced HSP27 band  
871 density indicating the PEG-DET-mediated increase in complexation between HSP27 and EVs.  
872 To summarize, HSP27 formed electrostatic complexes with PEG-DET, non-ionic and weak  
873 interactions with hCMEC/D3-derived EVs, and ternary mixtures with both PEG-DET and  
874 HSP27: (PEG-DET/HSP27)/EVs.

875  
876 **3.8. Physicochemical characterization of the formed HSP27 complexes/mixtures**



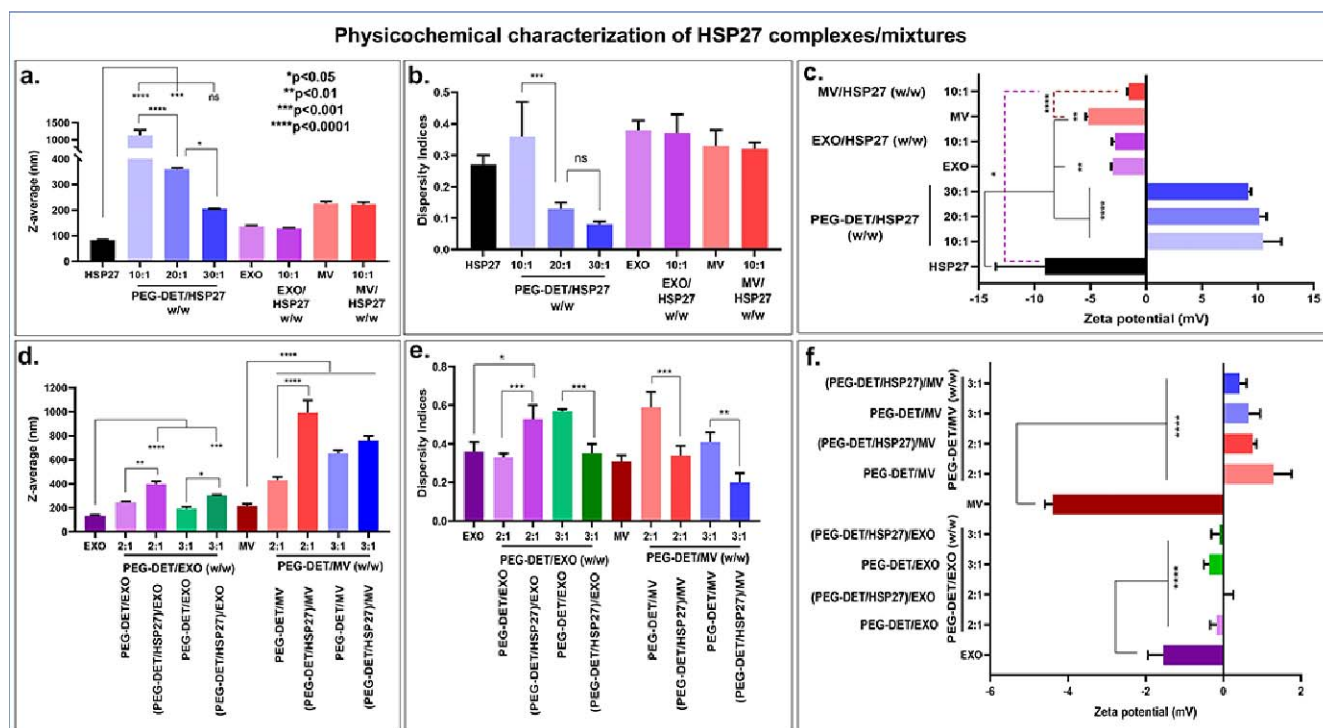

**Fig. 10. Physicochemical characterization of HSP27 complexes with PEG-DET and EVs.** Average particle diameters (a), dispersity indices (b), and zeta potentials (c) of the indicated samples were measured using dynamic light scattering on a Malvern Zetasizer Pro-Red. Average particle diameters (d), dispersity indices (e), and zeta potentials (f) of PEG-DET/EV and (PEG-DET/HSP27)/EV complexes at the indicated weight ratios. The samples containing 1  $\mu$ g HSP27 protein were diluted to 50  $\mu$ L in 10 mM HEPES buffer pH 7.4 for particle diameter measurements. The diluted samples were further diluted to 800  $\mu$ L in 10 mM HEPES buffer pH 7.4 for zeta potential measurements. Data represent mean $\pm$ SD (n=3). \* p<0.05, \*\*p<0.01, \*\*\*p<0.001, \*\*\*\*p<0.0001

877 Particle diameters, dispersity indices, and zeta potentials of the formed complexes/mixtures  
 878 were measured using dynamic light scattering (Fig. 10). The average diameter of native HSP27  
 879 protein was about 85 nm with a dispersity index of 0.27 (Fig. 10a,b). The average zeta potential  
 880 of native HSP27 (1  $\mu$ g/mL in 10 mM HEPES buffer, pH 7.4) was about -9 mV suggesting that  
 881 HSP27 exerts net negative surface charge under physiological conditions (Fig. 10c).

882  
 883 The average particle diameter of PEG-DET/HSP27 complexes at 10:1 w/w ratio was over  
 884 1000 nm with a broad dispersity index. As the weight ratio increased from 20:1 to 30:1, the  
 885 particle diameter significantly (p<0.05) decreased from about 359 nm to 205 nm with a very

886 narrow dispersity index (**Fig. 10a,b**). PEG-DET/HSP27 complexes showed a unimodal particle  
887 size distribution in the intensity plots (**Fig. S9a**). PEG-DET/HSP27 complexes at 10:1 w/w ratio  
888 shifted the zeta potential of the native HSP27 protein from -9 mV to +10 mV confirming the  
889 electrostatic complexation of PEG-DET with HSP27. The zeta potentials, however, did not  
890 continue increasing for w/w ratios of 20:1 and 30:1.

891  
892 EXOs and MVs derived from hCMEC/D3 cell lines showed diameters of about 136 and 225  
893 nm respectively, with dispersity indices ranging from 0.3 to 0.4 (**Fig 10a,b**). EXOs showed a  
894 bimodal particle size distribution compared to MVs (**Fig. S9c,e**). EXO/HSP27 or MV/HSP27  
895 mixtures at 10:1 w/w ratio did not change the average particle diameter and dispersity index  
896 compared to naïve EVs (**Fig. 10a,b**). In addition, the zeta potential of EXOs and MVs were -3.01  
897 and -5.20 mV respectively (**Fig. 10c** and **Fig. S9d,f**). The zeta potential of MV/HSP27 mixtures  
898 shifted towards near-neutral values compared to naïve MVs and native HSP27 protein suggesting  
899 the formation of MV/HSP27 complexes (**Fig. 10c**).

900  
901 Next, PEG-DET was mixed with EXOs and MVs at PEG-DET/EV w/w ratios 2:1 and 3:1,  
902 and the resulting changes in particle sizes, dispersity indices, and zeta potentials were compared  
903 with naïve EXOs and MVs (**Fig. 10d-f**). The complexation of PEG-DET to EXOs showed a  
904 considerable increase in particle size from 134 nm to 245 nm without affecting the dispersity  
905 index (**Fig. 10d,e**). The shift in mean zeta potential from -1.55 mV to -0.18 mV suggested the  
906 electrostatic interactions of PEG-DET and EXOs (**Fig. 10f**). Furthermore, the z-average particle  
907 diameter of (PEG-DET/HSP27)/EXO significantly ( $p < 0.01$ ) increased to about 400 nm with a  
908 neutral zeta potential suggesting the interactions of PEG-DET/HSP27 and EXOs (**Fig. 10d,f**). A

909 similar trend was observed for MVs where the particle diameter was gradually and significantly  
910 ( $p < 0.0001$ ) increased from naïve MVs (216 nm), PEG-DET/MV (431 nm), and (PEG-  
911 DET/HSP27)/MV (991 nm) with dispersity indices ranging from 0.3-0.6 (**Fig. 10d,e**). A marked  
912 shift in zeta potential was observed from -4 mV for naïve MVs to 1.29 mV for PEG-DET/MVs,  
913 and 0.75 mV for (PEG-DET/HSP27)/MVs confirming the electrostatic interactions of PEG-DET  
914 and MVs (**Fig. 10f**). In addition, an increase in PEG-DET to EV w/w ratio from 2:1 to 3:1  
915 showed a reduction in z-average diameter with a narrow dispersity index (**Fig 10d,e**). A slight  
916 decrease in zeta potential at PEG-DET/EV w/w 3:1 weight ratio suggested that increasing PEG-  
917 DET amount may increase the extent of complexation with EVs (**Fig. 10f**). The representative  
918 distribution plots of PEG-DET/EVs and (PEG-DET/HSP27)/EVs were shown in **Fig. S10**. To  
919 summarize, PEG-DET/HSP27 complexes showed a w/w ratio-dependent decrease in particle  
920 diameter with narrower dispersity indices and a positive surface charge. EV/HSP27 mixtures  
921 showed physicochemical characteristics more or less similar to naïve EVs. The observed changes  
922 in particle diameter, dispersity index, and zeta potential of (PEG-DET/HSP27)/EVs confirmed  
923 the complexation of EVs with PEG-DET/HSP27 complexes.

924

### 925 **3.9. PEG-DET/HSP27 complexes and EV/HSP27 mixtures were cytocompatible with** 926 **primary human brain endothelial cells.**

927 We performed an ATP assay on primary HBMECs treated with native HSP27, MV, or  
928 EXO/HSP27 mixtures at w/w 10:1 and PEG-DET/HSP27 complexes at w/w 20:1 at a dose of 2  
929  $\mu\text{g}$  HSP27 per well. The cell viability of treatment groups was calculated using *Equation 1*. The  
930 average viability of cells treated with native HSP27 was 108.7% and there were no significant  
931 ( $p > 0.05$ ) differences between control, untreated cells, and native HSP27-treated groups

932 suggesting that native HSP27 at 2  $\mu$ g/well was well tolerated by HBMEC under normoxic  
933 conditions for 72 h (**Fig. 7f**). The cell viability of HBMECs increased significantly ( $p < 0.01$ )  
934 when treated with EXO/HSP27 (124.7%), MV/HSP27 (123.1%), and EXO+MV /HSP27 (116.8)  
935 mixtures at 10:1 w/w ratio compared to untreated cells suggesting that EV/HSP27 mixtures were  
936 well tolerated by HBMEC for 72 h (**Fig. 7f**). The EV/HSP27 mixture-mediated increase in cell  
937 viability can be correlated with a significant increase in HBMEC ATP levels that was observed  
938 when cells were treated with naïve EXOs (121%), MVs (126.4%), or EXOs+MVs (120.1%) at  
939 amounts equivalent those present in the EV/HSP27 mixtures. HBMECs treated with PEG-  
940 DET/HSP27 complexes at w/w 20:1 treated showed an average 100.4% cell viability suggesting  
941 that PEG-DET/HSP27 complexes were cytocompatible for 72 h. Free PEG-DET polymer was  
942 also well tolerated by HBMECs for 72 h. Polyethyleneimine, a positive control, at 50 and 100  
943  $\mu$ g/mL concentrations showed a significant ( $p < 0.0001$ ) reduction in HBMEC viability indicating  
944 that the assay was responsive to the toxicities. We also confirmed the cytocompatibility of  
945 HSP27 complexes with the hCMEC/D3 cell line (**Fig. S8b**). hCMEC/D3 monolayers treated  
946 with native HSP27, EXOs or MV/HSP27, and PEG-DET/HSP27 complexes treated showed  
947  $>95\%$  cell viability for 72 h demonstrating their cytocompatibility (**Fig. S8b**).

948

### 949 **3.10. HSP27 complexes ameliorated the hypoxia-induced increase in BBB permeability** 950 **in primary HBMECs**

951

#### 952 **3.10.1. Paracellular permeability of 65-85 kD TRITC-Dextran (a large molecule tracer)** 953 **in PEG-DET/HSP27 and EV/HSP27 pre-treated HBMECs.** The effect of HSP27 complexed 954 with PEG-DET and hCMEC/D3-derived EVs on the paracellular permeability of 65-85kD

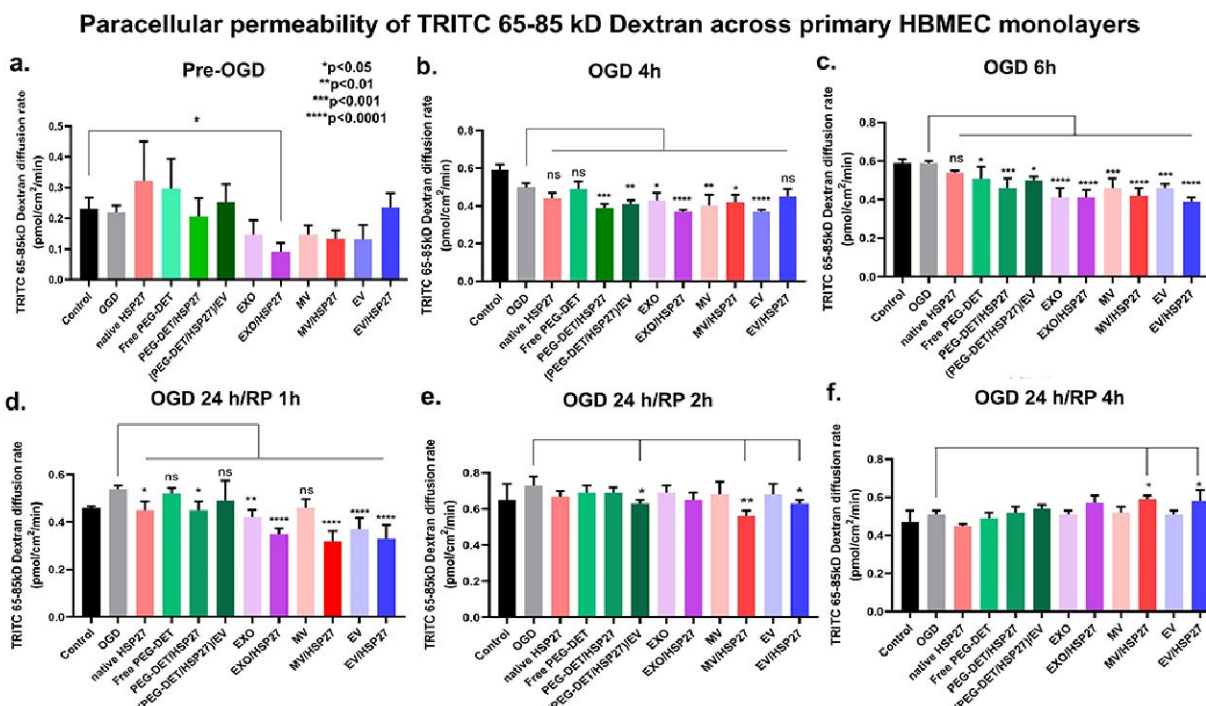

**Fig. 11. Paracellular permeability of TRITC 65-85 kD Dextran under pre-OGD, OGD, and OGD/reperfusion conditions in HBMEC transwell culture inserts pre-treated with PEG-DET/HSP27 and EV/HSP27.** HBMECs were seeded in 24-well plates and maintained in a 37°C humidified incubator for a week. The complete growth medium was replaced with 300  $\mu$ L of growth media containing indicated treatment groups for 72 h. Post-incubation, the media was replaced with complete growth medium containing 1 $\mu$ M TRITC 65-85 kD Dextran for 1 h (Pre-OGD) **a**). Post-treatment, the treatment media was replaced with 300  $\mu$ L of OGD medium containing 1  $\mu$ M TRITC 65-85 kD Dextran for 24 h. The abluminal chamber was filled with 0.5 mL of complete growth medium. Control, untreated cells were incubated in complete growth medium in a humidified incubator whereas OGD treatment groups were incubated in an OGD chamber. At 4 **(b)** and 6 h post-OGD **(c)**, a 500  $\mu$ L volume was collected from the abluminal chamber and a fresh medium was added to the transwell inserts. Post-OGD treatment, HBMEC cells were washed with PBS and incubated with 300  $\mu$ L of complete growth medium containing 1 $\mu$ M TRITC 65-85 kD Dextran and incubated in a humidified incubator for 1-24h. At each time point, a 500  $\mu$ L volume was collected from the abluminal chamber and fresh medium was added to the transwell inserts. The concentration of TRITC 65 kD Dextran was measured at 1 h (OGD/RP 1h, **d**), 2 h (OGD/RP 2h, **e**), and 4 h (OGD/RP 4h, **f**) using a Synergy HTX multimode plate reader at 485/20 nm excitation and 580/50 nm emission settings. The diffusion rate of TRITC 65-85 kD Dextran at each time point was calculated by normalizing the amount of TRITC Dextran per unit surface area of the insert per unit time. Data represent mean $\pm$ SD (n=2). \* p<0.05, \*\* p<0.01, \*\*\* p<0.001, \*\*\*\* p<0.0001, ns: non-

955 TRITC-Dextran was evaluated using primary HBMECs seeded in transwell cell culture inserts

956 under normoxic and hypoxic/OGD conditions. The 65-85kD TRITC-Dextran was used a high

957 molecular mass tracer simulating the diffusion of large molecules through the damaged BBB (9)

958 and the effects of HSP27 delivery on decreasing the tracer diffusion rate. HBMECs were treated  
959 with HSP27 at a dose of 2  $\mu$ g/well complexed with PEG-DET at 20:1 w/w ratio and EXOs,  
960 MVs, EVs (EXO: MV=1:1) at 10:1 w/w ratio. Native HSP27, free PEG-DET, and naïve EXOs,  
961 MVs, and EVs were used as controls. Prior to subjecting cells to OGD (Pre-OGD) (**Fig. 11a**),  
962 cells treated with EXO/HSP27 mixtures showed a significant ( $p<0.05$ ) reduction in TRITC-  
963 Dextran permeability compared to control, untreated cells. In addition, naïve EXOs, MVs, and  
964 EVs showed a considerable decrease in 65-85 kD TRITC-Dextran permeability (**Fig. 11a**). The  
965 data suggested that naïve EXOs and MVs and their HSP27 mixtures may increase the barrier  
966 properties of endothelial tight junctions compared to untreated cells under normoxic conditions.  
967 Interestingly, cells treated with native HSP27 and PEG-DET/HSP27 complexes did not show  
968 any change in the TRITC-Dextran diffusion rate under normoxic conditions.

969  
970 HBMECs pre-treated with PEG-DET/HSP27 complexes showed a significant ( $p<0.001$ )  
971 reduction in 65-85kD TRITC-Dextran diffusion during 4 h OGD exposure, whereas native  
972 HSP27 and free PEG-DET did not affect the permeability of high molecular weight dextran (**Fig.**  
973 **11b**). EXO/HSP27 and MV/HSP27 mixtures showed a significant ( $p<0.0001$ ) reduction in 65-85  
974 kD dextran diffusion rate compared to untreated OGD cells. Naïve EXOs, MVs, and EVs also  
975 showed a statistically significant ( $p<0.05$ ) reduction in dextran permeability under OGD  
976 conditions compared to untreated, OGD control (**Fig. 11b**). (PEG-DET/HSP27)/EV complexes  
977 also showed significant ( $p<0.01$ ) reduction in 65-85 kD TRITC-Dextran diffusion rate compared  
978 to untreated cells at 4 h OGD. Exposure of cells to PEG-DET/HSP27, EXO/HSP27, MV/HSP27,  
979 EV/HSP27, and (PEG-DET/HSP27)/EV complexes continued to decrease HBMEC permeability  
980 at 6 h OGD exposure showing a significant ( $p<0.0001$ ) reduction in the 65-85 kD diffusion rate

981 compared to the control (**Fig. 11c**). Importantly, naïve EXOs, MVs, and EVs also showed a  
982 significant ( $p<0.0001$ ) reduction in 65kD TRITC-Dextran paracellular diffusion rate compared to  
983 control (**Fig. 11c**). The data suggested that PEG-DET/HSP27 complexes can limit the diffusion  
984 of large molecules post-hypoxia/ischemia. Importantly, naïve EXOs and MVs limited the  
985 dextran diffusion before and during oxygen-glucose deprived conditions, whereas complexation  
986 of HSP27 with these EVs showed a synergistic effect on decreasing dextran diffusion during  
987 hypoxia/ischemia. Notably, there was no difference in the 65-85 kD TRITC-Dextran diffusion  
988 rate between control and HBMECs treated with HSP27 complexes at 24 h of OGD exposure  
989 (**Fig. S11a**).

990  
991 Post-OGD, the OGD medium was replaced with fresh complete growth medium to evaluate  
992 the effect of HSP27 complexed with PEG-DET and EVs on the ischemia/reperfusion-mediated  
993 diffusion of 65kD TRITC-Dextran. Exposure of cells to PEG-DET/HSP27 complexes showed a  
994 significant ( $p<0.05$ ) reduction in dextran diffusion rate 1 h post-ischemia/reperfusion (**Fig. 11d**).  
995 Importantly, EXO/HSP27, MV/HSP27, and EV/HSP27 mixtures showed a significant  
996 ( $p<0.0001$ ) reduction in dextran diffusion rate compared to OGD control after 1 h  
997 ischemia/reperfusion. Moreover, naïve EXOs and EVs also showed significant ( $p<0.05$ )  
998 reduction in diffusion after reperfusion suggesting that naïve EVs increase brain endothelial tight  
999 junction integrity immediately after ischemia/reperfusion, and their mixtures with HSP27  
1000 synergistically reduce the large molecule infiltration across the brain endothelial cells (**Fig. 11d**).  
1001 MV/HSP27 and EV/HSP27 mixtures showed a significant ( $p<0.05$ ) reduction in diffusion rate  
1002 compared to OGD control 2 h post-ischemia/reperfusion, whereas the changes in the diffusion  
1003 rate of dextran were insignificant ( $p>0.05$ ) in other treatment groups compared to OGD control

1004 **(Fig. 11e)**. It can be inferred that in addition to the naïve EV-mediated protection of BBB  
1005 integrity pre-OGD/normoxia, during-OGD, and ischemia/reperfusion, their mixtures with HSP27  
1006 can provide prolonged endothelial protection during ischemia/reperfusion. There were no further  
1007 differences in dextran diffusion rate amongst OGD control and treatment groups during 4-24h of  
1008 ischemia/reperfusion (**Fig. 11f** and **S11b**).

1009  
1010 **3.10.2. Paracellular permeability of 4.4 kD TRITC-Dextran (a small molecule tracer) in**  
1011 **PEG-DET/HSP27 and EV/HSP27 pre-treated HBMEC culture inserts**

1012 We measured the paracellular permeability of 4.4 kD TRITC-Dextran across HBMEC  
1013 monolayers to evaluate the effect of PEG-DET/HSP27 and EV/HSP27 pre-treatment on the  
1014 paracellular permeability of small molecules in primary HBMECs during normoxic, ischemic,  
1015 and ischemic/reperfusion conditions. HBMECs were treated at a dose of 2 µg/well HSP27  
1016 complexed with PEG-DET at 20:1 w/w ratio and EXOs, MVs, EVs (EXO: MV=1:1) at 10:1 w/w  
1017 ratio. Native HSP27, free PEG-DET, and naïve EXOs, MVs, and EVs were used as controls. The  
1018 difference in the diffusion rate of 4.4 kD dextran between untreated and HSP27 complexes-  
1019 treated cells during normoxic conditions and pre-OGD phase was not statistically significant  
1020 ( $p>0.05$ ) with the exceptions of MV/HSP27- and EV-treated groups (**Fig. 12a**). During the OGD  
1021 phase, PEG-DET/HSP27, and (PEG-DET/HSP27)/EV-treated HBMECs showed a significant  
1022 ( $p<0.05$ ) reduction in the rates of 4.4 kD dextran diffusion compared to OGD, native HSP27, and  
1023 free PEG-DET-treated HBMECs for 4 h (**Fig. 12b**). Besides, naïve EXO, MV, and EV-treated  
1024 HBMECs showed a significant ( $p<0.05$ ) reduction in paracellular permeability for 4 h (**Fig. 12b**)  
1025 and 6 h (**Fig. 12c**) of OGD exposure. Interestingly, HBMECs exposed to EXO/HSP27,  
1026 MV/HSP27, and EV/HSP27 did not affect the 4.4 kD dextran diffusion rate during 6 h of OGD.



1027 (PEG-DET/HSP27)/EV, naïve EXOs, MVs, and EV/HSP27 mixtures showed a consistent and  
1028 significant ( $p < 0.05$ ) reduction in the rate of 4.4 kD dextran diffusion for 24 h of OGD exposure  
1029 (**Fig. S11c**).

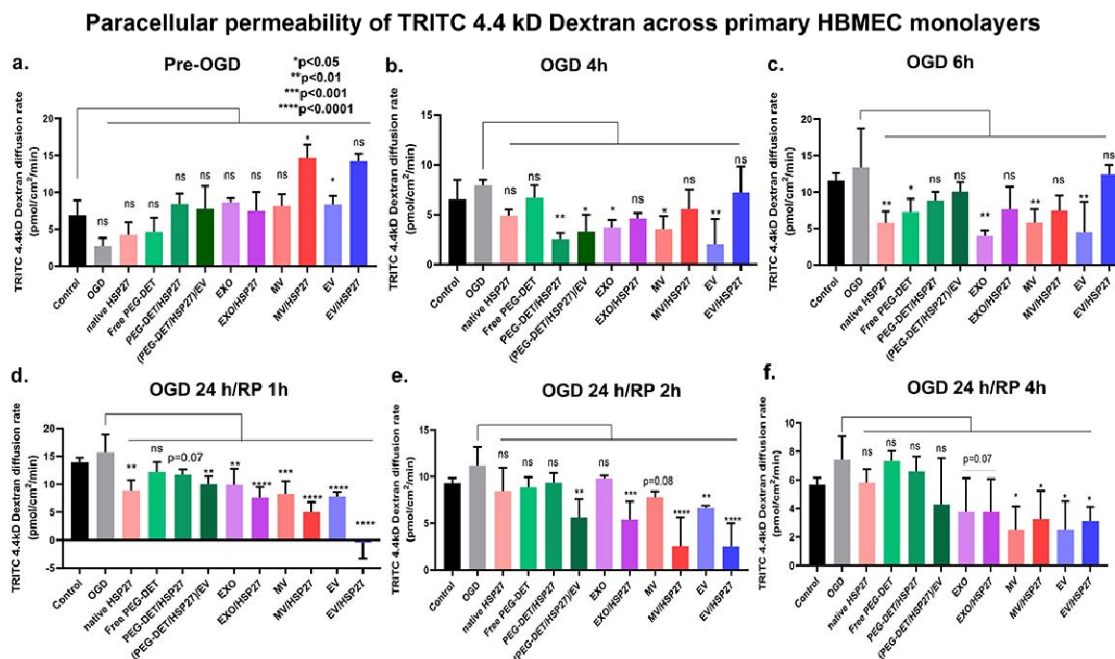

**Fig. 12. Paracellular permeability of TRITC 4.4 kD Dextran under pre-OGD, OGD, and OGD/reperfusion conditions in HBMEC transwell culture inserts pre-treated with PEG-DET/HSP27 and EV/HSP27.** HBMECs were seeded in 24-well plates and maintained in a 37°C humidified incubator for a week. The complete growth medium was replaced with 300  $\mu$ L of growth media containing indicated treatment groups for 72 h. Post-incubation, the media was replaced with complete growth medium containing 1 $\mu$ M TRITC 4.4 kD Dextran for 1 h (Pre-OGD) **a**). Post-treatment, the treatment media was replaced with 300  $\mu$ L of OGD medium containing 1  $\mu$ M TRITC 4.4 kD Dextran for 24 h. The abluminal chamber was filled with 0.5 mL of complete growth medium. Control, untreated cells were incubated in complete growth medium in a humidified incubator whereas OGD treatment groups were incubated in an OGD chamber. At 4 **(b)** and 6 h post-OGD **(c)**, a 500  $\mu$ L volume was collected from the abluminal chamber and fresh medium was added to the transwell inserts. Post-OGD treatment, HBMECs were washed with PBS and incubated with 300  $\mu$ L of complete growth medium containing 1 $\mu$ M TRITC 4.4 kD Dextran and incubated in a humidified incubator for 1-24h. At each time point, a 500  $\mu$ L volume was collected from the abluminal chamber and fresh medium was added to the transwell inserts. The concentration of TRITC 4.4 kD Dextran was measured at 1 h (OGD/RP 1h, **d**), 2 h (OGD/RP 2h, **e**), and 4 h (OGD/RP 4h, **f**) using a Synergy HTX multimode plate reader at 485/20 nm excitation and 580/50 nm emission settings. The diffusion rate of TRITC 4.4 kD Dextran at each time point was calculated by normalizing the amount of TRITC Dextran per unit surface area of the insert per unit time. Data represent mean $\pm$ SD (n=2). \* p<0.05, \*\* p<0.01, \*\*\* p<0.001, \*\*\*\* p<0.0001, ns: non-significant.

1030

1031

1032

1033 During the first hour of ischemia/reperfusion (OGD/RP), HBMECs exposed to native HSP27  
1034 and PEG-DET/HSP27 complexes showed a significant ( $p<0.05$ ) reduction in 4.4 kD dextran  
1035 diffusion rate compared to OGD and free PEG-DET polymer-treated cells (**Fig. 12d**). In  
1036 addition, naïve EXOs, EVs, EXO/HSP27, MV/HSP27, and EV/HSP27 pre-treated HBMECs  
1037 showed a highly significant ( $p<0.0001$ ) decrease in 4.4 kD dextran diffusion rate compared to  
1038 control OGD/RP HBMECs (**Fig. 12d**). MV/HSP27 and EV/HSP27-treatment mediated reduction  
1039 in 4.4 kDa dextran diffusion rate was observed till 2 h of OGD/RP while the dextran diffusion  
1040 rate in other treatment groups was non-significant compared to the untreated cells (**Fig. 12e**).  
1041 There was no significant difference in dextran diffusion rate between control and treated  
1042 OGD/RP HBMECs from 4 - 24 h (**Fig. 12f** and **S11d**). The possible reason for the observed lack  
1043 of changes in the small molecule/4.4 kDa dextran diffusion rate during the reperfusion phase is  
1044 likely due to the reperfusion-mediated rapid recovery of ischemic HBMECs.

1045

#### 1046 **4. Discussion**

1047 The lack of blood supply in brain blood vessels during ischemic stroke induces oxygen-  
1048 glucose deprivation in brain tissues that results in sudden energy failure, mitochondrial damage,  
1049 and disruption of BBB tight junctions in brain endothelial cells (2, 4). The restoration of blood  
1050 flow/“ischemia/reperfusion” further damages the BBB integrity leads to increased paracellular  
1051 permeability of toxins and immune cells from blood to the brain parenchyma (7, 43-45). The  
1052 damage to the BBB-forming endothelial cells during ischemia/reperfusion disrupts the structure  
1053 and function of the neurovascular unit and results in secondary brain damage leading to  
1054 hemorrhagic transformation, poor neurological outcomes, and long-term cognitive impairments  
1055 (9, 45). A treatment strategy that preserves the structure and function of the BBB would limit the

1056 infiltration of deleterious molecules across the BBB, and consequently reduce the progression of  
1057 brain injury and improve neurological functions in stroke patients (9). Therefore, a one, two-  
1058 punch strategy to increase brain endothelial cell bioenergetics and decrease endothelial  
1059 paracellular permeability is a promising approach to ameliorate ischemia/reperfusion-induced  
1060 BBB damage post-ischemic stroke.

1061  
1062 We have used EVs: a natural nanocarrier, for this one, two-punch delivery strategy. EVs are  
1063 known to incorporate mitochondrial components such as mitochondria, mitochondrial DNA, and  
1064 proteins along with their inherent nucleic acid, lipids, and protein cargoes during their biogenesis  
1065 (39, 46-48). On the other hand, endothelial overexpression of HSP27 in a transgenic mouse  
1066 model of focal cerebral ischemia decreased mice brain infarct volume compared to neuronally-  
1067 overexpressed HSP27 and placebo mice (9, 10, 49). Therefore, the goal of this study was to  
1068 engineer EVs for the delivery of exogenous HSP27 protein. The one, two-punch strategy is to  
1069 harness the innate EV mitochondrial load to increase endothelial bioenergetics and we  
1070 hypothesized that HSP27 delivery to endothelial cells can reduce paracellular permeability in  
1071 ischemic endothelial cells. We believe that this approach to protect the brain endothelial cells is a  
1072 potent strategy to decrease the long-term damage and dysfunction to the neurovascular unit that  
1073 is comprised of endothelial cells, neurons, astrocytes, pericytes and microglia. Protection of the  
1074 neurovascular unit is increasingly recognized as a vital component (9, 10, 45) of novel stroke  
1075 therapies.

1076  
1077 The present study investigated (1) the naïve EV-mediated increase in mitochondrial function  
1078 of recipient human brain endothelial cells under normoxic and ischemic conditions, and (2) the

1079 efficiency of EVs and a synthetic cationic polymer, PEG-DET, to interact/complex with HSP27  
1080 and their effect to decrease BBB permeability in ischemic brain endothelial cells. The results of  
1081 our studies demonstrated that polarized mitochondria from EVs, specifically from MVs, were  
1082 transferred into and colocalized with the mitochondrial network of the recipient endothelial cells.  
1083 As a result, EV-treated primary HBMECs demonstrated increased intracellular ATP levels and  
1084 mitochondrial respiration during normoxic and hypoxic conditions. Besides, EVs and PEG-DET  
1085 polymer formed nano-sized complexes with recombinant human HSP27 protein demonstrating  
1086 nano carrier-based approaches to deliver therapeutic proteins to the BBB. Importantly,  
1087 prophylactic treatment of EV/HSP27 mixtures and PEG-DET/HSP27 complexes significantly  
1088 reduced ischemia-induced paracellular permeability of small and large tracer molecules across  
1089 primary HBMEC monolayers *in vitro*.

1090

1091 Brain endothelial cells form the foremost layer of the blood-brain barrier (BBB) and they  
1092 contain about two to five-fold greater mitochondrial content compared to non-BBB cells (50).  
1093 Moreover, the membranes of brain microvascular endothelial cell-derived EVs contain BBB  
1094 receptors such as transferrin and insulin that enable EVs to cross the BBB for the treatment of  
1095 various neurovascular disorders (51-53). A greater mitochondrial load and their natural affinity  
1096 for BBB targeting motivated us to isolate exosomes (EXOs) and microvesicles (MV) from a  
1097 human cerebral microvascular endothelial (hCMEC/D3) cell line in our studies. We used an  
1098 established differential ultracentrifugation, the most commonly used EV isolation method (54),  
1099 to isolate MVs and EXOs from the conditioned medium. Cell debris and apoptotic bodies were  
1100 eliminated from the conditioned medium at low-centrifugal speeds (2000×g) followed by  
1101 pelleting MVs and EXOs at 20,000 and 120,000×g centrifugal forces, respectively. Post-

1102 ultracentrifugation and resuspension, EXOs and MVs showed their characteristic particle  
1103 diameters (100-250 nm, **Fig. 1a-d**) that largely aligned with the previous reports (19, 28, 38, 55,  
1104 56). Anionic phospholipid components such as phosphatidylinositol, phosphatidylserine, and  
1105 glycosylated lipid derivatives exert a net negative zeta potential on the EXOs and MV  
1106 membranes (**Fig. 1e,f**) (48, 57). The broad polydispersity indices demonstrate the natural  
1107 heterogeneity of both EV sub-populations. Similar to cells and other biomolecules, it is  
1108 important to preserve EV physicochemical characteristics and biological activities during storage  
1109 conditions which critically determine the scope of their therapeutic application. Jeyaram *et al.*  
1110 showed that EVs isolated from biofluids such as blood, milk, urine, and conditioned medium  
1111 preserved their physical and functional properties stored at -80°C compared to 4° and -20°C (58,  
1112 59). Moreover, freeze-thaw cycles at -20° and -80°C did not affect the stability of plasma  
1113 exosome miRNA (60). Lorincz *et al.* reported that 28 days of storage at -20° and -80°C did not  
1114 affect the particle numbers of neutrophilic granulocyte-derived EVs, but moderately shifted their  
1115 particle diameter and antibacterial activity (61). In our studies, EXOs and MVs isolated from  
1116 conditioned medium retained their particle diameters, dispersity indices, and zeta potential after  
1117 three consecutive freeze-thaw cycles (samples were frozen at -20°C for 24 h and then were  
1118 thawed at room temperature for 1 h, **Fig. 1a-f**).

1119  
1120 The integrity of the EXO and MV membranes immediately post-isolation and post-frozen  
1121 storage were determined using a calcein-AM-based flow cytometry analysis. Calcein AM  
1122 permeates the EV membranes, and as a result, intact vesicular esterases hydrolyze the  
1123 acetoxymethyl-moiety of calcein AM to the non-permeant fluorescent calcein (62). The lack of  
1124 esterases in damaged vesicles cannot activate the calcein-AM, therefore, this strategy can be

1125 utilized to differentiate intact vs. disrupted under a variety of conditions such as post- EV  
1126 isolation, storage, freeze-thaw cycles, and at various osmolarities (62-64). Mitchell *et al.*  
1127 confirmed that exosome integrity was not affected by salt concentration-induced osmolarity  
1128 changes in urine specimens using the calcein AM assay (64). Kong *et al.* utilized the calcein AM  
1129 method to investigate the impact of storage conditions and anti-coagulants on MV particle counts  
1130 and sizes using flow cytometry (63). The authors reported that the particle counts of calcein-  
1131 labeled MV significantly decreased at -80°C storage for one to four weeks, however, remained  
1132 unaffected during 4°C storage for a week. Our analysis of calcein-labeled EVs indicated that  
1133 freezing EXOs and MVs at -20°C and thawing them thrice did not affect their particle count and  
1134 membrane integrity compared to freshly-isolated EVs (**Fig. 1j,k**). Overall, our study  
1135 demonstrated that naïve EXOs and MVs-isolated from conditioned medium preserved their  
1136 physical characteristics, and at least >90% of EVs maintained their membrane integrity during  
1137 the -20°C storage.

1138  
1139 We confirmed the presence of ATP5A as we did in our previous studies (19, 28), a subunit of  
1140 mitochondrial adenosine triphosphate synthase complex (19, 65), in the hCMEC/D3 cell line-  
1141 derived MVs using western blotting (**Fig. S12**). The mitochondrial ATP5A plays important role  
1142 in mitochondrial ATP production via catalyzing the synthesis of ATP from ADP in the  
1143 mitochondrial matrix during oxidative phosphorylation (66). A considerably higher ATP5A band  
1144 density in hCMEC/D3-derived MVs compared to EXOs suggested that MVs contain a greater  
1145 mitochondrial load compared to EXOs. Todkar *et al.* demonstrated that Optic Atrophy-1 and  
1146 sorting nexin 9-dependent pathways play an important role in sorting mitochondrial proteins into  
1147 EVs and prevented the incorporation of damage-associated molecular patterns into EVs (39).

1148 Phinney *et al.* have demonstrated that mesenchymal stem cells-derived MVs, but not EXOs,  
1149 contained depolarized mitochondria (38). As a pro-survival mechanism during physiological or  
1150 oxidative stress-induced mitophagy, mitochondria align with the plasma membranes and extrude  
1151 into arrestin domain-containing protein-1-mediated MVs which bud outwards directly from the  
1152 plasma membrane (38). Besides, macrophage-derived EXOs showed the presence of CD9 (**Fig.**  
1153 **S12**), a tetraspanin EXO biomarker associated with exosomal cargo selection, binding, and  
1154 uptake of EXOs by target cells (67) suggesting the purity of isolated EXOs using the  
1155 ultracentrifugation. We also noted the presence of CD9 in MVs derived from hCMEC/D3 cells.  
1156 Glyceraldehyde 3-phosphate dehydrogenase (GAPDH, 37 kD) was used as an additional control  
1157 demonstrating the presence of cytosolic components in EXOs and MVs (**Fig. S12**). EXOs  
1158 contained greater GAPDH compared to MVs likely due to increased cytosolic component  
1159 incorporation during its biogenesis. Hence, the incorporation of mitochondrial components in  
1160 naïve MVs and EXOs may have the potential to increase cellular ATP levels in the recipient  
1161 cells.

1162

1163 Mitochondria, the central metabolic hub of cells, are essential organelles especially in high  
1164 metabolic rate organs such as the brain (68). Mitochondria regulate and are involved in critical  
1165 cellular events such as the production of cellular energy by ATP synthesis, induction of  
1166 apoptosis, cell reproduction, growth, and differentiation, calcium homeostasis, immune  
1167 activation, and mitophagy (39, 68, 69). Therefore, it is essential to maintain the quantity and  
1168 quality of mitochondria for cell survival and tissue homeostasis. Under physiological conditions,  
1169 a notable spontaneous intercellular transfer of mitochondria occurs during tissue homeostasis and  
1170 development (70). During stress-induced conditions like oxygen-glucose deprivation in ischemic



1171 stroke, ATP depletion-induced calcium accumulation and glutamate excitotoxicity increase  
1172 electron leakage in mitochondria followed by increased reactive oxygen species (ROS)  
1173 generation (3, 4, 70). The rapid accumulation of ROS in mitochondria drastically depolarizes the  
1174 mitochondrial membrane potential, and consequently, degrades damaged mitochondria (70).  
1175 Cells cannot survive upon mitochondrial dysfunction-induced cellular energy deprivation, and  
1176 hence, mitochondrial replacement via supplementation of exogenous mitochondria or  
1177 mitochondrial components is an efficient way to revitalize exhausted cells in many CNS  
1178 disorders including ischemic stroke (71). Our TEM analysis demonstrated that MVs, but not  
1179 EXOs, showed the presence of one or five mitochondria per MV (**Fig. 2 f-h**). Mitochondria-rich  
1180 MV morphology was consistent with published reports (38, 72). Numerous *in vitro*, pre-clinical,  
1181 and clinical studies have demonstrated that mitochondria or mitochondrial components such as  
1182 mtDNA, mitochondrial proteins were secreted into the extracellular milieu and transferred  
1183 between CNS cells (38, 47, 73-77). For instance, mesenchymal stem cell-derived-MV transferred  
1184 mitochondria into the recipient macrophages leading to increased cellular bioenergetics (38).  
1185 Guescini *et al.* provided evidence that exosomes were released from glioblastoma and astrocytes  
1186 transfer mtDNA from glioblastoma to astrocytes (78). Mitochondria in MVs-derived from  
1187 lipopolysaccharide-stimulated monocytes released mitochondria and mitochondrial transfer-  
1188 mediated proinflammatory responses were observed in the recipient endothelial cells (47).

1189

1190 We isolated EXOs and MVs from the conditioned medium of Mitotracker deep red (MitoT-  
1191 red) pre-stained hCMEC/D3 cells to label polarized mitochondria in EVs. MitoT-red is a  
1192 mitochondrion membrane potential-dependent carbocyanine dye that selectively stains polarized  
1193 mitochondria, and its fluorescence intensity is reduced during mitochondrial depolarization (79,

1194 80). We demonstrated that MVs contain a greater polarized mitochondrial load compared to  
1195 EXOs and efficiently transfer mitochondria into recipient human brain endothelial cells (**Fig. 3a-**  
1196 **c, 4 and Fig. S4**). MV-associated mitochondria were transferred into the recipient endothelial  
1197 cells within 24 h of incubation. Increasing the MV dose and incubation time significantly  
1198 increased mitochondrial transfer in the recipient cells. Importantly, the transferred mitochondria  
1199 efficiently integrated with the mitochondria network of recipient cells likely due to mitochondrial  
1200 fusion. The colocalization of EV mitochondria and recipient cell mitochondria was confirmed by  
1201 the presence of overlapping signals of the EV-mitochondria fluorescence signals with the  
1202 recipient mitochondrial signals. We used two orthogonal approaches to stain the mitochondrial  
1203 network in the recipient cells: Mitotracker green and the CellLight mitochondria-GFP BacMam  
1204 technique (**Fig. 5, 6 and Fig. S6, 7**). The carbocyanine Mitotracker green dye stains the  
1205 functional mitochondria in the recipient endothelial cells whereas CellLight Mitochondria-GFP  
1206 BacMam comprising a fusion construct of  $\alpha$ -pyruvate dehydrogenase and emGFP packaged in  
1207 the baculoviral vector stains a structural mitochondrial matrix protein ( $\alpha$ -pyruvate  
1208 dehydrogenase) in the recipient cells (40). Thus, utilizing two orthogonal types of staining  
1209 techniques, we demonstrated an efficient colocalization of polarized EV mitochondria with the  
1210 polarized mitochondria in the recipient cells (via Mito-T-green staining, **Fig. 5**) and integration  
1211 of functional, polarized EV mitochondria with the structurally intact mitochondria in the  
1212 recipient cells (via CellLight Mitochondria-GFP staining, **Fig. 6**).

1213  
1214 MVs and EXOs showed a dose-dependent increase in colocalization at 72 h, specifically, the  
1215 MV mitochondria demonstrated a significantly greater colocalization coefficient compared to  
1216 EXOs (**Fig. S5**). A selective mitochondrial packaging into endothelial cell-derived microvesicles

1217 compared to exosomes was consistent with published reports (38, 47, 78). The uptake of the  
1218 heterogenous EVs population by recipient cells depends on the membrane proteins and  
1219 glycoproteins found on the surface of both the target cell and the EVs (81). Many studies have  
1220 revealed that EVs can be endocytosed by different cells via different mechanisms including  
1221 clathrin-mediated endocytosis (82, 83), caveolin-mediated endocytosis, endocytosis via lipid  
1222 rafts, macropinocytosis (82), and phagocytosis (68, 81, 84, 85). The EV content is released to the  
1223 receptor cells by direct fusion to the plasma membrane and they either unload their contents into  
1224 the cytosol (86, 87), internalize with organelles such as endoplasmic reticulum, mitochondria  
1225 (88), and nucleus (89), or be routed to the lysosomes for degradation. Conqvist *et al.* have shown  
1226 that EVs derived from placental syncytiotrophoblast internalized into primary endothelial cells  
1227 via clathrin-mediated endocytosis and transferred placenta-specific miRNA from EVs into the  
1228 endoplasmic reticulum and mitochondria of the recipient cells (83, 88). Islam *et al.* reported that  
1229 bone-marrow-stromal cell-derived mitochondria-containing MVs donated functional  
1230 mitochondria to alveolar epithelial cells via connexin 43-containing gap junction channels (74).  
1231 Phinney *et al.* showed that MVs mitochondria fused with recipient macrophages to unload  
1232 partially depolarized mitochondria, thereby increasing the recipient cell's bioenergetics (38).  
1233 Overall, MV-mediated transfer of functional mitochondria and their colocalization with recipient  
1234 endothelial mitochondrial network resulted in the mitochondrial transfer-mediated increases in  
1235 cellular ATP levels and mitochondrial respiration under normoxic and ischemic conditions.

1236  
1237 One of the main functions of mitochondria is to synthesize ATP from ADP during  
1238 mitochondrial aerobic respiration, and therefore, we measured the resulting relative ATP levels  
1239 in the recipient endothelial cells treated with EXOs or MVs using a Cell Glo ATP assay. The

1240 Cell Titer Glo reagent lyses the cells resulting in the release of intracellular ATP that activates  
1241 the conversion of luciferin to luciferase. This sensitive, rapid, and reproducible cell viability  
1242 assay is directly proportional to the amount of ATP in metabolically viable cells (90). Our results  
1243 demonstrated that naïve EXOs and MVs showed a dose-dependent significant increase in the  
1244 relative ATP levels at 48 h-post incubation (**Fig. 7a-c**). Importantly, MVs outperformed EXOs in  
1245 increasing recipient cell viability and the effects persisted for 72 h-post incubation (**Fig. 7b,c**).  
1246 Islam *et al.* reported that mitochondria containing MVs derived from bone marrow stromal cells  
1247 increased ATP levels of alveolar epithelial cells (74). Guo *et al.* demonstrated that transfer of  
1248 mitochondria isolated from donor bone marrow-derived mesenchymal cells (BMSC) into the  
1249 recipient BMSCs increased cellular ATP production, proliferation, migration, and repaired bone  
1250 defects *in vitro* and *in vivo* (91).

1251  
1252 Ischemia-induced oxygen-glucose deprivation leads to a sudden drop in the endothelial ATP  
1253 levels cells that subsequently switch off the Na<sup>+</sup>/K<sup>+</sup> and Ca<sup>2+</sup> ATPase ionic transporters (2-4).  
1254 The sodium and calcium accumulation in endothelial cells potentiate endothelial cell death  
1255 through glutamate and dopamine excitotoxicity coupled with cellular depolarization. Numerous  
1256 cell culture, preclinical, and clinical studies have demonstrated the ischemia-induced cerebral  
1257 endothelial dysfunction/apoptosis and BBB breakdown (92-95). In our studies, endothelial cells  
1258 exposed to oxygen-glucose deprived (OGD) exposure in a hypoxic chamber led to about 40% at  
1259 4 h and 60% endothelial cell death at 24 h compared to untreated cells (**Fig. 7d**). The observed  
1260 data is consistent with the published reports (96, 97). Our results showed that primary HBMECs  
1261 treated with hCMEC/D3-derived naïve EXOs and MVs resulted in a four to five-fold increase in  
1262 endothelial ATP levels compared to control, untreated cells (**Fig. 7e**). Importantly, EV-mediated

1263 increases in ATP levels were dose-dependent and MVs outperformed compared to EXOs in  
1264 rescuing the ATP levels and consequently the survival of ischemic primary HBMECs 24 h post-  
1265 OGD (**Fig. 7e**). It can be inferred from our western blot results and published reports (38, 39)  
1266 that the MV-mediated increase in recipient endothelial cell ATP levels is associated with the  
1267 presence of functional mitochondria and mitochondrial proteins and their transfer into the  
1268 recipient cells. High throughput proteomic analysis revealed 89 types of mitochondrial proteins  
1269 in MVs vs. a single type in EXOs isolated from hCMEC/D3 cells (32). The presence of  
1270 mitochondrial components such as mtDNA and mitochondrial proteins in EXOs can also  
1271 enhance cellular mitochondrial function (32, 55). A published report has shown that EXOs  
1272 isolated from healthy and asthmatic human airway myeloid-derived regulatory cells incorporated  
1273 mitochondria that transferred and colocalized with the mitochondria of recipient T cells (32).  
1274 Kong *et al.* reported that treatment with mesenchymal stem cell (MSC)-derived exosomes  
1275 rescued OGD-induced rat primary brain endothelial cell death (98). Arslan *et al.* reported that  
1276 MSC-derived exosomes resulted in a two-fold increase in ATP levels in ischemia/reperfused  
1277 mice compared to saline (99). The authors reported that administration of EXOs five minutes  
1278 prior to reperfusion in ischemic mice showed about a 45% decrease in mice myocardium infarct  
1279 volume compared to saline treatment. Besides, murine hemibrain-isolated EVs containing  
1280 mitovesicles showed a two-fold increase in brain ATP levels compared to oligomycin and  
1281 antimycin-I treated EVs (100). Overall, MV-associated mitochondria and exosomal mtDNA  
1282 and/or mitochondrial proteins have shown the potential to rescue normoxic and ischemic  
1283 endothelial cells in a dose- and time-dependent manner by increasing intracellular ATP levels.  
1284

1285 Metabolic pathways such as mitochondrial respiration and glycolysis are the major sources of  
1286 ATP for cellular energy production (101). Therefore, we investigated the effects of MV and  
1287 EXO treatment on mitochondrial respiration and glycolytic capacity function in the recipient  
1288 endothelial cells using a Seahorse setup. The state-of-art Seahorse extracellular flux (XF)  
1289 analyzer allows measuring the extracellular acidification rate (ECAR), an indicator of glycolysis,  
1290 and the oxygen consumption rates (OCR), an indicator of mitochondrial respiration in real-time  
1291 in live intact cells (102, 103). Glycolysis takes place in the cytosol where a series of metabolic  
1292 reactions converts glucose into pyruvate followed by reversible formation of lactate and  
1293 hydrogen ions which release into the extracellular spaces. Glycolysis is an oxygen-independent  
1294 process that generates two ATP molecules from a single glucose molecule (104). On the other  
1295 hand, mitochondrial respiration involves electron transport and oxidative phosphorylation that  
1296 takes place in the inner mitochondrial membrane and generates 34 ATP molecules per cycle of  
1297 the electron transport chain (105). During oxidative phosphorylation, tricyclic acid pathway-  
1298 derived electrons combine with oxygen, and the energy resulting from this redox reaction drives  
1299 the synthesis of ATP from ADP (105).

1300  
1301 We demonstrated that hCMEC/D3 cells treated with EXOs and MVs show a dose-dependent  
1302 significant increase in basal and maximum OCR at 72 h exposure (**Fig. 8a-c**). Consistent with  
1303 ATP assays (**Fig. 7a-c**), the MV-mediated increase in maximum mitochondrial respiration was  
1304 greater than EXOs suggesting that MV mitochondria efficiently increased the recipient cell  
1305 mitochondrial function under physiological/normoxic conditions. Interestingly, we noted that  
1306 EXOs showed a dose-dependent and significantly greater increase in recipient glycolysis  
1307 capacity compared to MVs. We speculate that MVs likely colocalize with the mitochondria

1308 whereas EXOs are released into the cytosol and thereby contribute to the greater glycolytic  
1309 capacity. Phinney *et al.* demonstrated that MSC-derived EXOs and MVs significantly increased  
1310 basal and maximum OCR in the recipient macrophages compared to controls in MSC-  
1311 macrophage cocultures (38). Published reports have indicated that the transfer of only a few  
1312 mitochondria, even partially depolarized mitochondria is sufficient to rescue cellular  
1313 bioenergetics in mtDNA-depleted recipient cells (38, 73, 106). Overall, our western blotting  
1314 results (**Fig. S12**) and Mitotracker deep red staining studies (**Fig. 4**) confirmed the presence of  
1315 mitochondrial proteins and functional mitochondria in EVs. MV mitochondria-mediated increase  
1316 in recipient cellular mitochondrial respiration at 72 h (**Fig. 8**) is likely explained by the greater  
1317 transfer and colocalization of MitoT-red-MVs (**Fig. 4-6, S5,6**) into primary human brain  
1318 endothelial cells and the greater extent of increases in intracellular ATP (**Fig. 7a-c**). Our use of  
1319 these orthogonal tools and observations demonstrate that MVs carry a higher load of functional  
1320 mitochondria compared to EXOs. The maximum transfer and colocalization of MV mitochondria  
1321 within the recipient primary human brain endothelial cells take about 48 to 72 h and this  
1322 mitochondrial uptake consequently results in increased cellular ATP levels, mitochondrial  
1323 respiration, and glycolytic capacities.

1324  
1325 BBB breakdown is one of the hallmarks of ischemic stroke pathology, which is initiated due  
1326 to hypoperfusion-induced oxygen-glucose deprivation and persists for several days to weeks  
1327 even after the restoration of blood flow (ischemia/reperfusion) (2-4). Following the onset of  
1328 ischemic stroke, alteration and endocytosis of BBB-forming tight and adherens junction proteins  
1329 cause increased leakage of paracellular solutes and immune cells from blood to the brain  
1330 parenchyma (3). Under physiological/normoxic conditions, tight junction proteins and adhesion

1331 proteins associate with accessory proteins such as zonula occludens-1 (ZO-1) that are further  
1332 anchored to cytoskeleton proteins such as  $\alpha$ -actin (9, 107). Independent of the metalloproteinase-  
1333 mediated degradation of endothelial tight junctions, ischemia/reperfusion induces rapid actin  
1334 polymerization in endothelial cells resulting in the formation of stress fibers consisting of F-  
1335 actin, myosin, and other proteins (9, 45). The transmission of this intracellular tension results in  
1336 the disassembly of the actin cytoskeleton leading to the internalization of tight junction and  
1337 adherens junction proteins in endothelial cells. Shi *et al.* demonstrated that endothelial  
1338 overexpression of HSP27 in transgenic mice showed a significant and prolonged reduction in  
1339 infarct volume compared to neuronal overexpression of HSP27 and saline-treated transgenic  
1340 focal ischemic mice (9). HSP27 inhibits the actin polymerization, therefore, reduces the G-  
1341 actin/F-actin ratio consequently restores the tight junction integrity and enhances BBB protection  
1342 during ischemia/reperfusion (9, 10). Therefore, we delivered HSP27 into primary brain  
1343 endothelial cells to determine the HSP27-mediated protection of paracellular permeability across  
1344 the endothelial monolayers. Native HSP27 has a half-life of about 2 h (108) and is susceptible to  
1345 protease and enzymatic degradation in plasma and physiological conditions (109).

1346  
1347 We used EVs as a natural nanocarrier and PEG-DET as a synthetic carrier to deliver HSP27  
1348 into endothelial cells. The isoelectric point of human recombinant HSP27 is 5.89 (42), therefore,  
1349 it exerts a net negative charge at physiological pH 7.4 (**Fig. 10a**). Diethyltriamine side chain of  
1350 PEG-DET cationic diblock copolymer has two pKa values associated with its molecular  
1351 conformation (*gauche* vs. *anti*). The *gauche* conformation of DET exerts a pKa of 9.9 that  
1352 induces the formation of stable complexes with negatively charged nucleotides at physiological  
1353 pH 7.4 (24, 110). We confirmed the formation of PEG-DET/HSP27 complexes using native



1354 PAGE followed by Coomassie staining (**Fig. 9a,b**) and dynamic light scattering (**Fig. 10a-c**).  
1355 The optimal PEG-DET/HSP27 w/w ratio of 20/1 formed a complex with about 70% of HSP27  
1356 incorporation which was further confirmed by the disappearance of the HSP27 band in native  
1357 PAGE (**Fig. 9a**) and a shift in the zeta potential from ca. -9 mV (HSP27) to about +9 mV (PEG-  
1358 DET/HSP27 complexes) (**Fig. 10c**). These nano-sized complexes showed unimodal and narrow  
1359 particle size distribution further confirming the formation of complexes in the solution.

1360  
1361 Despite the negative surface charge of EVs and the native HSP27 protein at pH 7.4,  
1362 hCMEC/D3-EV/HSP27 mixtures showed about 20% protein interaction in native PAGE analysis  
1363 without affecting the physicochemical characteristics of naïve EVs. Haney *et al.* also reported  
1364 that macrophage-derived exosomes incubated with bovine liver catalase proteins did not affect  
1365 the particle diameter and dispersity indices of the EXO/catalase mixture (111). Notably, the zeta  
1366 potential of EV/HSP27 mixtures was significantly different compared to native HSP27. It is  
1367 possible that native HSP27 passively diffuses into the EV lumen as well as forms weak protein-  
1368 protein hydrophobic interactions (112) or the mixtures may be stabilized by nonbonded  
1369 interactions such as H-H bonds. The weaker interactions of HSP27 with EVs were advantageous  
1370 for our study as we wanted to avoid any mode of intrusive cargo loading (such as sonication,  
1371 freeze/thaw cycles, saponin-mediated loading) that may damage the integrity of EV membranes  
1372 and inversely impact the functionality of innate cargoes, specifically, their mitochondrial load.  
1373 We further confirmed the MV and HSP27 interactions using an immunoprecipitation pull-down  
1374 assay (**Fig. S13**). We engineered ternary mixtures of EVs with PEG-DET/HSP27 complexes at  
1375 different weight ratios to increase the HSP27 loading into hCMEC/D3-derived EVs. The  
1376 positively-charged PEG-DET/HSP27 complexes (+9 mV, **Fig. 10c**) formed an electrostatic

1377 complex with EXOs and MVs which was confirmed by an intermediate HSP7 band density  
1378 between PEG-DET/HSP27 complexes and EXO/HSP27 mixtures (**Fig. 9h**) and increased  
1379 resulting particle diameters (**Fig. 10d**). (PEG-DET/HSP27)/EV complexes showed an  
1380 electroneutral or slight-positive zeta potential (**Fig. 10f**) which may allow longer systemic  
1381 circulation and a greater cellular uptake. The inclusion of EVs in (PEG-DET/HSP27)/EV  
1382 complexes may facilitate interactions with the BBB and mediate endothelial targeting (113)  
1383 during *in vivo* delivery while the positive charges derived from PEG-DET can enhance the  
1384 cellular uptake and facilitate endosomal escape of HSP27 (24). The cytosolic release of HSP27  
1385 in endothelial cells can and reduce paracellular permeability of hydrophilic molecules and  
1386 immune cells (9) and ultimately increase the BBB integrity.

1387  
1388 We evaluated the prophylactic PEG-DET/HSP27 and EV/HSP27 treatment-induced  
1389 protection of BBB integrity by measuring the diffusion rate of the hydrophilic tracers varying in  
1390 molecular mass across cultured endothelial monolayers under ischemia/reperfusion conditions.  
1391 The diffusion rate of the larger 65-85 kD TRITC-Dextran in untreated hCMEC/D3 cells and  
1392 HBMECs were compared at pre-OGD conditions, during OGD, and OGD/reperfusion conditions  
1393 (**Fig. S14**). The baseline diffusion rate was found to be different for both cell models. The  
1394 diffusion rate gradually increased and was relatively higher for the hCMEC/D3 cell line  
1395 compared to the HBMEC monolayer during ischemia/reperfusion (RP) suggesting the inherent  
1396 leakiness of the hCMEC/D3 cell line compared to primary HBMECs. Therefore, we studied the  
1397 effects of naïve EV and HSP27 complexes exposure on the diffusion rate of 4.4 kD and 65-85  
1398 kD TRITC-dextran during OGD and OGD/RP conditions in primary HBMEC monolayers.  
1399 Naïve EVs, PEG-DET/HSP27, and EV/HSP27 complexes were cytocompatible with HBMECs

1400 for 72 h of exposure under normoxic conditions (**Fig. 7f**). Notably, EXO/HSP27, MV/HSP27,  
1401 and EV/HSP27 mixtures significantly increased cell viability compared to untreated cells and are  
1402 likely an additive effect of naïve EV mitochondrial transfer and anti-apoptotic/cell proliferation  
1403 effects of HSP27 (114-117).

1404

1405 First, we analyzed the effect of exposure of naïve EV, PEG-DET/HSP27 complexes, and  
1406 EV/HSP27 mixtures on the diffusion rate of 65-85 kD TRITC-Dextran, a large molecular weight  
1407 tracer simulating the infiltration of proteins and blood-borne large molecules during  
1408 ischemia/reperfusion. Exposure of different treatment groups for 72 h did not affect the baseline  
1409 permeability of HBMECs for large molecules, importantly, EXO/HSP27 mixtures showed an  
1410 added effect on limiting diffusion of the TRITC-Dextran (**Fig. 11a**). Interestingly, HBMECs  
1411 treated with PEG-DET/HSP27 complexes efficiently decreased 65-85 kD TRITC-Dextran  
1412 diffusion rate for 6 h of OGD exposure followed by an immediate hour of ischemia/reperfusion  
1413 compared to OGD-HBMEC control, native HSP27, and free PEG-DET-treated groups (**Fig. 11b-**  
1414 **f**). These results indicated that PEG-DET-mediated efficient transfer of HSP27 in endothelial  
1415 cells could restore the integrity of tight junctions and protect BBB integrity during ischemia and  
1416 ischemia/reperfusion injury. Importantly, naïve EXO and MV-treated HBMECs showed strong  
1417 BBB protection during OGD conditions and the first hour of ischemia/reperfusion. It should be  
1418 noted that naïve EXOs also contain HSP proteins such as HSP20, HSP27, HSP40, and HSP70  
1419 (118-121), and therefore, the innate HSP load in EXOs and MV mitochondria could enhance  
1420 overall endothelial cell survival and tight junction integrity during OGD conditions. EV/HSP27  
1421 mixtures further strengthened the BBB tight junction demonstrating that EV facilitates HSP27  
1422 transfer into endothelial cells resulting in synergistic BBB protection from large molecule

1423 infiltration during ischemia and ischemia/reperfusion injury. We inferred that the integrity of  
1424 tight junction proteins was restored after 2 h of reperfusion due to a similar dextran diffusion rate  
1425 in OGD, control, and treatment groups. Therefore, it is essential to protect endothelial tight  
1426 junction integrity during the early stage of ischemia/reperfusion (<2 h in culture conditions).  
1427 Importantly, PEG-DET/HSP27, EV/HSP27, and naïve EV-mediated immediate BBB protection  
1428 during the early reperfusion stage demonstrate their promising role in ischemic stroke therapy.  
1429 Lastly, we further confirmed the naïve EV, PEG-DET/HSP27, and EV/HSP27-induced  
1430 protection of BBB from the paracellular flux of small molecules under OGD and OGD/RP  
1431 conditions. PEG-DET/HSP27 complexes strengthened the tight junctions to restrict 4.4 kD  
1432 dextran entry up until 4 h of OGD exposure and an immediate hour of OGD/RP (**Fig. 12a-f**).  
1433 Importantly, naïve EVs, but not their HSP27 complexes, retarded small molecule permeability  
1434 during OGD conditions. Furthermore, naïve EV and their HSP27 complexes reduced 4.4 kD  
1435 dextran diffusion for 6 h of ischemia/reperfusion injury. Notably, the magnitude of EV/HSP27  
1436 complex-mediated BBB protection is considerably greater than naïve EVs demonstrating a  
1437 synergistic effect of EVs and HSP27 in increasing endothelial tight junction integrity.  
1438 Noteworthy, naïve EV and EV/HSP27 complexes-mediated reduction in 4.4 kD and 65-85 kD  
1439 dextran diffusion rate were significantly higher and prolonged compared to polymer-based  
1440 HSP27 delivery (**Fig. 11,12**).

1441  
1442 To summarize, endothelial cell-derived naïve MVs and EXOs contain functional  
1443 mitochondria and mitochondrial proteins that internalize and integrate with the mitochondrial  
1444 network of recipient endothelial cells. As a result, naïve MVs and EXOs increased ATP levels,  
1445 mitochondrial respiration, and glycolytic capacities in the recipient brain endothelial cells. EXOs

1446 and MVs form non-bonded interactions with exogenous therapeutic HSP27 protein and HSP27  
1447 delivery resulted in increased tight junction integrity in primary human brain endothelial cells by  
1448 limiting the paracellular permeability of small and large molar mass tracer molecules during  
1449 ischemia/reperfusion injury.

1450

## 1451 **5. Conclusion**

1452 This one, two-punch approach increased the brain endothelial cell survival and their  
1453 mitochondrial function due to the innate EV mitochondrial load, and EV/HSP27 restored BBB  
1454 tight junction integrity by limiting the paracellular permeability of small and large molecular  
1455 mass tracers. The outcome of the present study indicates that this approach has a strong potential  
1456 to protect the BBB that in turn can ameliorate the long-term neurological damage and  
1457 dysfunction in *in vivo* models of ischemic stroke.

1458

## 1459 **Acknowledgments**

1460 This work was supported via start-up funds for the Manickam laboratory from Duquesne  
1461 University (DU) and a 2021 Faculty Development Fund (Office of Research, DU) to the PI. We  
1462 would like to acknowledge the Neurodegenerative Undergraduate Research Experience (NURE)  
1463 R25NS100118 for funding DXD. The authors express their deep appreciation to Dr. Rehana  
1464 Leak (DU) for her insights and technical advice. The authors are thankful to Dr. Lauren  
1465 O'Donnell, and Mss. Manisha Chandwani and Yashika Kamte (DU) for flow cytometry support.

1466

## 1467 **Author contribution**

1468 **Conceptualization** D.S.M **Experiment design** K.M.D and D.S.M **Seahorse studies** K.M.D,  
1469 M.J.R, S.S.S, D.S.M **Transmission electron microscopy** K.M.D and D.B.S **PEG-DET**  
1470 **synthesis** Y.B **EV physicochemical characterization** K.M.D, R.B, D.D, H.Y, R.R **Flow**  
1471 **cytometry, Fluorescence microscopy, Permeability assays** K.M.D, D.S.M **Data analysis**  
1472 K.M.D, D.S.M **Manuscript writing** K.M.D, D.S.M

1473

## 1474 **References**

- 1475 1. <https://www.cdc.gov/stroke/facts.htm>  
1476 2. Nian K, Harding IC, Herman IM, Ebong EE. Blood-Brain Barrier Damage in Ischemic  
1477 Stroke and Its Regulation by Endothelial Mechanotransduction. *Front Physiol.* 2020;11(1681).  
1478 3. Abdullahi W, Tripathi D, Ronaldson PT. Blood-brain barrier dysfunction in ischemic  
1479 stroke: targeting tight junctions and transporters for vascular protection. *Am J Physiol Cell*  
1480 *Physiol.* 2018;315(3):C343-C56.  
1481 4. Bernardo-Castro S, Sousa JA, Brás A, Cecília C, Rodrigues B, Almendra L, et al.  
1482 Pathophysiology of Blood–Brain Barrier Permeability Throughout the Different Stages of  
1483 Ischemic Stroke and Its Implication on Hemorrhagic Transformation and Recovery. *Frontiers in*  
1484 *Neurology.* 2020;11(1605).  
1485 5. Liu S, Feng X, Jin R, Li G. Tissue plasminogen activator-based nanothrombolysis for  
1486 ischemic stroke. *Expert Opin Drug Deliv.* 2018;15(2):173-84.  
1487 6. Zhang Y, Wang Y, Zuo Z, Wang Z, Roy J, Hou Q, et al. Effects of tissue plasminogen  
1488 activator timing on blood-brain barrier permeability and hemorrhagic transformation in rats with  
1489 transient ischemic stroke. *J Neurol Sci.* 2014;347(1-2):148-54.  
1490 7. Jiang X, Andjelkovic AV, Zhu L, Yang T, Bennett MVL, Chen J, et al. Blood-brain  
1491 barrier dysfunction and recovery after ischemic stroke. *Prog Neurobiol.* 2018;163-164:144-71.  
1492 8. Stamatovic SM, Keep RF, Wang MM, Jankovic I, Andjelkovic AV. Caveolae-mediated  
1493 internalization of occludin and claudin-5 during CCL2-induced tight junction remodeling in  
1494 brain endothelial cells. *J Biol Chem.* 2009;284(28):19053-66.  
1495 9. Shi Y, Jiang X, Zhang L, Pu H, Hu X, Zhang W, et al. Endothelium-targeted  
1496 overexpression of heat shock protein 27 ameliorates blood-brain barrier disruption after ischemic  
1497 brain injury. *Proc Natl Acad Sci U S A.* 2017;114(7):E1243-e52.  
1498 10. Leak RK, Zhang L, Stetler RA, Weng Z, Li P, Atkins GB, et al. HSP27 protects the  
1499 blood-brain barrier against ischemia-induced loss of integrity. *CNS Neurol Disord Drug Targets.*  
1500 2013;12(3):325-37.  
1501 11. Rada CC, Mejia-Pena H, Grimsey NJ, Cordova IC, Olson J, Wozniak JM, et al. Heat  
1502 shock protein 27 activity is linked to endothelial barrier recovery after proinflammatory GPCR-  
1503 induced disruption. *Sci Signal.* 2021;14(698):eabc1044.  
1504 12. During RL, Gibson BG, Li W, Bishai EA, Sidhu GS, Landry J, et al. Anthrax lethal toxin  
1505 paralyzes actin-based motility by blocking Hsp27 phosphorylation. *EMBO J.* 2007;26(9):2240-  
1506 50.

- 1507 13. Hirano S, Rees RS, Yancy SL, Welsh MJ, Remick DG, Yamada T, et al. Endothelial  
1508 barrier dysfunction caused by LPS correlates with phosphorylation of HSP27 in vivo. *Cell Biol*  
1509 *Toxicol.* 2004;20(1):1-14.
- 1510 14. Miron T, Vancompernelle K, Vandekerckhove J, Wilchek M, Geiger B. A 25-kD  
1511 inhibitor of actin polymerization is a low molecular mass heat shock protein. *J Cell Biol.*  
1512 1991;114(2):255-61.
- 1513 15. Jakob U, Gaestel M, Engel K, Buchner J. Small heat shock proteins are molecular  
1514 chaperones. *J Biol Chem.* 1993;268(3):1517-20.
- 1515 16. Garrido C, Bruey JM, Fromentin A, Hammann A, Arrigo AP, Solary E. HSP27 inhibits  
1516 cytochrome c-dependent activation of procaspase-9. *FASEB J.* 1999;13(14):2061-70.
- 1517 17. Voss OH, Batra S, Kolattukudy SJ, Gonzalez-Mejia ME, Smith JB, Doseff AI. Binding  
1518 of caspase-3 prodomain to heat shock protein 27 regulates monocyte apoptosis by inhibiting  
1519 caspase-3 proteolytic activation. *J Biol Chem.* 2007;282(34):25088-99.
- 1520 18. Bruey JM, Ducasse C, Bonniaud P, Ravagnan L, Susin SA, Diaz-Latoud C, et al. Hsp27  
1521 negatively regulates cell death by interacting with cytochrome c. *Nat Cell Biol.* 2000;2(9):645-  
1522 52.
- 1523 19. D'Souza A, Burch A, Dave KM, Sreeram A, Reynolds MJ, Dobbins DX, et al.  
1524 Microvesicles transfer mitochondria and increase mitochondrial function in brain endothelial  
1525 cells. *J Control Release.* 2021;338:505-26.
- 1526 20. Banks WA, Sharma P, Bullock KM, Hansen KM, Ludwig N, Whiteside TL. Transport of  
1527 Extracellular Vesicles across the Blood-Brain Barrier: Brain Pharmacokinetics and Effects of  
1528 Inflammation. *International journal of molecular sciences.* 2020;21(12):4407.
- 1529 21. Murphy DE, de Jong OG, Brouwer M, Wood MJ, Lavieu G, Schiffelers RM, et al.  
1530 Extracellular vesicle-based therapeutics: natural versus engineered targeting and trafficking.  
1531 *Experimental & Molecular Medicine.* 2019;51(3):1-12.
- 1532 22. Doyle LM, Wang MZ. Overview of Extracellular Vesicles, Their Origin, Composition,  
1533 Purpose, and Methods for Exosome Isolation and Analysis. *Cells.* 2019;8(7):727.
- 1534 23. He Z, Ning N, Zhou Q, Khoshnam SE, Farzaneh M. Mitochondria as a therapeutic target  
1535 for ischemic stroke. *Free Radical Biology and Medicine.* 2020;146:45-58.
- 1536 24. Jiang Y, Arounleut P, Rheiner S, Bae Y, Kabanov AV, Milligan C, et al. SOD1  
1537 nanozyme with reduced toxicity and MPS accumulation. *J Control Release.* 2016;231:38-49.
- 1538 25. Han M, Bae Y, Nishiyama N, Miyata K, Oba M, Kataoka K. Transfection study using  
1539 multicellular tumor spheroids for screening non-viral polymeric gene vectors with low  
1540 cytotoxicity and high transfection efficiencies. *Journal of Controlled Release.* 2007;121(1):38-  
1541 48.
- 1542 26. Xiong MP, Bae Y, Fukushima S, Forrest ML, Nishiyama N, Kataoka K, et al. pH-  
1543 Responsive Multi-PEGylated Dual Cationic Nanoparticles Enable Charge Modulations for Safe  
1544 Gene Delivery. *ChemMedChem.* 2007;2(9):1321-7.
- 1545 27. Lai TC, Bae Y, Yoshida T, Kataoka K, Kwon GS. pH-Sensitive Multi-PEGylated Block  
1546 Copolymer as a Bioresponsive pDNA Delivery Vector. *Pharmaceutical Research.*  
1547 2010;27(11):2260-73.
- 1548 28. Dave KM, Zhao W, Hoover C, D'Souza A, S Manickam D. Extracellular Vesicles  
1549 Derived from a Human Brain Endothelial Cell Line Increase Cellular ATP Levels. *AAPS*  
1550 *PharmSciTech.* 2021;22(1):18.
- 1551 29. Chen TH, Bae Y, Furgeson DY, Kwon GS. Biodegradable hybrid recombinant block  
1552 copolymers for non-viral gene transfection. *Int J Pharm.* 2012;427(1):105-12.

- 1553 30. Kanayama N, Fukushima S, Nishiyama N, Itaka K, Jang W-D, Miyata K, et al. A PEG-  
1554 Based Biocompatible Block Cationer with High Buffering Capacity for the Construction of  
1555 Polyplex Micelles Showing Efficient Gene Transfer toward Primary Cells. *ChemMedChem*.  
1556 2006;1(4):439-44.
- 1557 31. Donker RB, Mouillet JF, Chu T, Hubel CA, Stolz DB, Morelli AE, et al. The expression  
1558 profile of C19MC microRNAs in primary human trophoblast cells and exosomes. *Mol Hum*  
1559 *Reprod*. 2012;18(8):417-24.
- 1560 32. Hough KP, Trevor JL, Strenkowski JG, Wang Y, Chacko BK, Tousif S, et al. Exosomal  
1561 transfer of mitochondria from airway myeloid-derived regulatory cells to T cells. *Redox Biol*.  
1562 2018;18(2213-2317):54-64.
- 1563 33. Dave KM, Ali L, Manickam DS. Characterization of the SIM-A9 cell line as a model of  
1564 activated microglia in the context of neuropathic pain. *PLOS ONE*. 2020;15(4):e0231597.
- 1565 34. Dave KM, Han L, Jackson MA, Kadlecik L, Duvall CL, D SM. DNA Polyplexes of a  
1566 Phosphorylcholine-Based Zwitterionic Polymer for Gene Delivery. *Pharm Res*. 2020;37(9):176.
- 1567 35. Dai X, Chen J, Xu F, Zhao J, Cai W, Sun Z, et al. TGFalpha preserves oligodendrocyte  
1568 lineage cells and improves white matter integrity after cerebral ischemia. *J Cereb Blood Flow*  
1569 *Metab*. 2020;40(3):639-55.
- 1570 36. Cardenes N, Corey C, Geary L, Jain S, Zharikov S, Barge S, et al. Platelet bioenergetic  
1571 screen in sickle cell patients reveals mitochondrial complex V inhibition, which contributes to  
1572 platelet activation. *Blood*. 2014;123(18):2864-72.
- 1573 37. Anne Stetler R, Leak RK, Gao Y, Chen J. The dynamics of the mitochondrial organelle  
1574 as a potential therapeutic target. *Journal of cerebral blood flow and metabolism : official journal*  
1575 *of the International Society of Cerebral Blood Flow and Metabolism*. 2013;33(1):22-32.
- 1576 38. Phinney DG, Di Giuseppe M, Njah J, Sala E, Shiva S, St Croix CM, et al. Mesenchymal  
1577 stem cells use extracellular vesicles to outsource mitophagy and shuttle microRNAs. *Nature*  
1578 *Communications*. 2015;6(1):8472.
- 1579 39. Todkar K, Chikhi L, Desjardins V, El-Mortada F, Pépin G, Germain M. Selective  
1580 packaging of mitochondrial proteins into extracellular vesicles prevents the release of  
1581 mitochondrial DAMPs. *Nature Communications*. 2021;12(1):1971.
- 1582 40. CellLight™ Mitochondria-GFP, BacMam 2.0 (ThermoFisher website)
- 1583 41. <https://www.agilent.com/en/products/cell-analysis/how-seahorse-xf-analyzers-work>.
- 1584 42. <http://protcalc.sourceforge.net/>.
- 1585 43. Venkat P, Chopp M, Chen J. Blood-Brain Barrier Disruption, Vascular Impairment, and  
1586 Ischemia/Reperfusion Damage in Diabetic Stroke. *J Am Heart Assoc*. 2017;6(6):e005819.
- 1587 44. Arba F, Rinaldi C, Caimano D, Vit F, Busto G, Fainardi E. Blood-Brain Barrier  
1588 Disruption and Hemorrhagic Transformation in Acute Ischemic Stroke: Systematic Review and  
1589 Meta-Analysis. *Front Neurol*. 2020;11:594613.
- 1590 45. Shi Y, Zhang L, Pu H, Mao L, Hu X, Jiang X, et al. Rapid endothelial cytoskeletal  
1591 reorganization enables early blood-brain barrier disruption and long-term ischaemic reperfusion  
1592 brain injury. *Nature Communications*. 2016;7(1):10523.
- 1593 46. Falchi AM, Sogos V, Saba F, Piras M, Congiu T, Piludu M. Astrocytes shed large  
1594 membrane vesicles that contain mitochondria, lipid droplets and ATP. *Histochem Cell Biol*.  
1595 2013;139(2):221-31.
- 1596 47. Puhm F, Afonyushkin T, Resch U, Obermayer G, Rohde M, Penz T, et al. Mitochondria  
1597 Are a Subset of Extracellular Vesicles Released by Activated Monocytes and Induce Type I IFN  
1598 and TNF Responses in Endothelial Cells. *Circulation Research*. 2019;125(1):43-52.



- 1599 48. El Andaloussi S, Mäger I, Breakefield XO, Wood MJA. Extracellular vesicles: biology  
1600 and emerging therapeutic opportunities. *Nature Reviews Drug Discovery*. 2013;12(5):347-57.
- 1601 49. Shimada Y, Shimura H, Tanaka R, Yamashiro K, Koike M, Uchiyama Y, et al.  
1602 Phosphorylated recombinant HSP27 protects the brain and attenuates blood-brain barrier  
1603 disruption following stroke in mice receiving intravenous tissue-plasminogen activator. *PLOS*  
1604 *ONE*. 2018;13(5):e0198039.
- 1605 50. Oldendorf WH, Cornford ME, Brown WJ. The large apparent work capability of the  
1606 blood-brain barrier: a study of the mitochondrial content of capillary endothelial cells in brain  
1607 and other tissues of the rat. *Ann Neurol*. 1977;1(5):409-17.
- 1608 51. Schiera G, Di Liegro CM, Di Liegro I. Extracellular Membrane Vesicles as Vehicles for  
1609 Brain Cell-to-Cell Interactions in Physiological as well as Pathological Conditions. *BioMed*  
1610 *Research International*. 2015;2015:152926.
- 1611 52. Andras IE, Toborek M. Extracellular vesicles of the blood-brain barrier. *Tissue Barriers*.  
1612 2016;4(1):e1131804.
- 1613 53. Yang T, Martin P, Fogarty B, Brown A, Schurman K, Phipps R, et al. Exosome delivered  
1614 anticancer drugs across the blood-brain barrier for brain cancer therapy in *Danio rerio*. *Pharm*  
1615 *Res*. 2015;32(6):2003-14.
- 1616 54. Yang D, Zhang W, Zhang H, Zhang F, Chen L, Ma L, et al. Progress, opportunity, and  
1617 perspective on exosome isolation - efforts for efficient exosome-based theranostics.  
1618 *Theranostics*. 2020;10(8):3684-707.
- 1619 55. Dozio V, Sanchez JC. Characterisation of extracellular vesicle-subsets derived from brain  
1620 endothelial cells and analysis of their protein cargo modulation after TNF exposure. *J Extracell*  
1621 *Vesicles*. 2017;6(1):1302705.
- 1622 56. Kanada M, Bachmann MH, Hardy JW, Frimannson DO, Bronsart L, Wang A, et al.  
1623 Differential fates of biomolecules delivered to target cells via extracellular vesicles. *Proceedings*  
1624 *of the National Academy of Sciences*. 2015;112(12):E1433-E42.
- 1625 57. Konoshenko MY, Lekchnov EA, Vlassov AV, Laktionov PP. Isolation of Extracellular  
1626 Vesicles: General Methodologies and Latest Trends. *Biomed Res Int*. 2018;2018:8545347.
- 1627 58. Jeyaram A, Jay SM. Preservation and Storage Stability of Extracellular Vesicles for  
1628 Therapeutic Applications. *AAPS J*. 2017;20(1):1.
- 1629 59. Ge Q, Zhou Y, Lu J, Bai Y, Xie X, Lu Z. miRNA in Plasma Exosome is Stable under  
1630 Different Storage Conditions. *Molecules*. 2014;19(2):1568-75.
- 1631 60. Witwer KW, Buzás EI, Bemis LT, Bora A, Lässer C, Lötval J, et al. Standardization of  
1632 sample collection, isolation and analysis methods in extracellular vesicle research. *J Extracell*  
1633 *Vesicles*. 2013;2(1):20360.
- 1634 61. Lőrincz ÁM, Timár CI, Marosvári KA, Veres DS, Otrókoci L, Kittel Á, et al. Effect of  
1635 storage on physical and functional properties of extracellular vesicles derived from neutrophilic  
1636 granulocytes. *J Extracell Vesicles*. 2014;3(1):25465.
- 1637 62. Gray WD, Mitchell AJ, Searles CD. An accurate, precise method for general labeling of  
1638 extracellular vesicles. *MethodsX*. 2015;2:360-7.
- 1639 63. Kong F, Zhang L, Wang H, Yuan G, Guo A, Li Q, et al. Impact of collection, isolation  
1640 and storage methodology of circulating microvesicles on flow cytometric analysis. *Exp Ther*  
1641 *Med*. 2015;10(6):2093-101.
- 1642 64. Mitchell PJ, Welton J, Staffurth J, Court J, Mason MD, Tabi Z, et al. Can urinary  
1643 exosomes act as treatment response markers in prostate cancer? *J Transl Med*. 2009;7:4.

- 1644 65. Goldberg J, Currais A, Prior M, Fischer W, Chiruta C, Ratliff E, et al. The mitochondrial  
1645 ATP synthase is a shared drug target for aging and dementia. *Aging Cell*. 2018;17(2):e12715.
- 1646 66. Jonckheere AI, Smeitink JAM, Rodenburg RJT. Mitochondrial ATP synthase:  
1647 architecture, function and pathology. *J Inherit Metab Dis*. 2012;35(2):211-25.
- 1648 67. Andreu Z, Yáñez-Mó M. Tetraspanins in extracellular vesicle formation and function.  
1649 *Front Immunol*. 2014;5:442.
- 1650 68. Zhang Y, Tan J, Miao Y, Zhang Q. The effect of extracellular vesicles on the regulation  
1651 of mitochondria under hypoxia. *Cell Death & Disease*. 2021;12(4):358.
- 1652 69. Park JH, Hayakawa K. Extracellular Mitochondria Signals in CNS Disorders. *Front Cell*  
1653 *Dev Biol*. 2021;9(248):642853.
- 1654 70. Liu D, Gao Y, Liu J, Huang Y, Yin J, Feng Y, et al. Intercellular mitochondrial transfer  
1655 as a means of tissue revitalization. *Signal Transduct Target Ther*. 2021;6(1):65.
- 1656 71. Rutkai I, Merdzo I, Wunnava SV, Curtin GT, Katakam PV, Busija DW. Cerebrovascular  
1657 function and mitochondrial bioenergetics after ischemia-reperfusion in male rats. *J Cereb Blood*  
1658 *Flow Metab*. 2019;39(6):1056-68.
- 1659 72. Ikeda G, Santoso MR, Tada Y, Li AM, Vaskova E, Jung J-H, et al. Mitochondria-Rich  
1660 Extracellular Vesicles From Autologous Stem Cell-Derived Cardiomyocytes Restore Energetics  
1661 of Ischemic Myocardium. *Journal of the American College of Cardiology*. 2021;77(8):1073-88.
- 1662 73. Spees JL, Olson SD, Whitney MJ, Prockop DJ. Mitochondrial transfer between cells can  
1663 rescue aerobic respiration. *Proceedings of the National Academy of Sciences*. 2006;103(5):1283-  
1664 8.
- 1665 74. Islam MN, Das SR, Emin MT, Wei M, Sun L, Westphalen K, et al. Mitochondrial  
1666 transfer from bone-marrow-derived stromal cells to pulmonary alveoli protects against acute  
1667 lung injury. *Nature Medicine*. 2012;18(5):759-65.
- 1668 75. Hayakawa K, Esposito E, Wang X, Terasaki Y, Liu Y, Xing C, et al. Transfer of  
1669 mitochondria from astrocytes to neurons after stroke. *Nature*. 2016;535(7613):551-5.
- 1670 76. Sinha P, Islam MN, Bhattacharya S, Bhattacharya J. Intercellular mitochondrial transfer:  
1671 bioenergetic crosstalk between cells. *Current Opinion in Genetics & Development*. 2016;38:97-  
1672 101.
- 1673 77. Gao L, Zhang Z, Lu J, Pei G. Mitochondria Are Dynamically Transferring Between  
1674 Human Neural Cells and Alexander Disease-Associated GFAP Mutations Impair the Astrocytic  
1675 Transfer. *Front Cell Neurosci*. 2019;13(316):316.
- 1676 78. Guescini M, Genedani S, Stocchi V, Agnati LF. Astrocytes and Glioblastoma cells  
1677 release exosomes carrying mtDNA. *Journal of Neural Transmission*. 2009;117(1):1.
- 1678 79. Xiao B, Deng X, Zhou W, Tan EK. Flow Cytometry-Based Assessment of Mitophagy  
1679 Using MitoTracker. *Front Cell Neurosci*. 2016;10(76):76.
- 1680 80. Chazotte B. Labeling mitochondria with MitoTracker dyes. *Cold Spring Harb Protoc*.  
1681 2011;2011(8):990-2.
- 1682 81. Mulcahy LA, Pink RC, Carter DR. Routes and mechanisms of extracellular vesicle  
1683 uptake. *J Extracell Vesicles*. 2014;3(2001-3078).
- 1684 82. Costa Verdera H, Gitz-Francois JJ, Schiffelers RM, Vader P. Cellular uptake of  
1685 extracellular vesicles is mediated by clathrin-independent endocytosis and macropinocytosis. *J*  
1686 *Control Release*. 2017;266:100-8.
- 1687 83. Cronqvist T, Erlandsson L, Tannetta D, Hansson SR. Placental syncytiotrophoblast  
1688 extracellular vesicles enter primary endothelial cells through clathrin-mediated endocytosis.  
1689 *Placenta*. 2020;100:133-41.

- 1690 84. Mohning MP, Thomas SM, Barthel L, Mould KJ, McCubbrey AL, Frasch SC, et al.  
1691 Phagocytosis of microparticles by alveolar macrophages during acute lung injury requires  
1692 MerTK. *Am J Physiol Lung Cell Mol Physiol*. 2018;314(1):L69-182.
- 1693 85. van Niel G, D'Angelo G, Raposo G. Shedding light on the cell biology of extracellular  
1694 vesicles. *Nat Rev Mol Cell Biol*. 2018;19(4):213-28.
- 1695 86. Parolini I, Federici C, Raggi C, Lugini L, Palleschi S, De Milito A, et al.  
1696 Microenvironmental pH is a key factor for exosome traffic in tumor cells. *J Biol Chem*.  
1697 2009;284(49):34211-22.
- 1698 87. Montecalvo A, Larregina AT, Shufesky WJ, Stolz DB, Sullivan ML, Karlsson JM, et al.  
1699 Mechanism of transfer of functional microRNAs between mouse dendritic cells via exosomes.  
1700 *Blood*. 2012;119(3):756-66.
- 1701 88. Cronqvist T, Tannetta D, Mörgelin M, Belting M, Sargent I, Familiari M, et al.  
1702 Syncytiotrophoblast derived extracellular vesicles transfer functional placental miRNAs to  
1703 primary human endothelial cells. *Scientific Reports*. 2017;7(1):4558.
- 1704 89. Santos MF, Rappa G, Karbanová J, Kurth T, Corbeil D, Lorico A. VAMP-associated  
1705 protein-A and oxysterol-binding protein-related protein 3 promote the entry of late endosomes  
1706 into the nucleoplasmic reticulum. *J Biol Chem*. 2018;293(36):13834-48.
- 1707 90. Petty RD, Sutherland LA, Hunter EM, Cree IA. Comparison of MTT and ATP-based  
1708 assays for the measurement of viable cell number. *J Biolumin Chemilumin*. 1995;10(1):29-34.
- 1709 91. Guo Y, Chi X, Wang Y, Heng BC, Wei Y, Zhang X, et al. Mitochondria transfer  
1710 enhances proliferation, migration, and osteogenic differentiation of bone marrow mesenchymal  
1711 stem cell and promotes bone defect healing. *Stem Cell Res Ther*. 2020;11(1):245.
- 1712 92. Zhang J, Tan Z, Tran ND. Chemical hypoxia-ischemia induces apoptosis in  
1713 cerebromicrovascular endothelial cells. *Brain Res*. 2000;877(2):134-40.
- 1714 93. Andjelkovic AV, Xiang J, Stamatovic SM, Hua Y, Xi G, Wang MM, et al. Endothelial  
1715 Targets in Stroke. *Arteriosclerosis, Thrombosis, and Vascular Biology*. 2019;39(11):2240-7.
- 1716 94. Yang DI, Lin TN, Yin KJ, Hu CJ, Chen SD, Xu J, et al. Cerebral Endothelial Cell  
1717 Reaction to Ischemic Insults. In: Lajtha A, Chan PH, editors. *Handbook of Neurochemistry and*  
1718 *Molecular Neurobiology: Acute Ischemic Injury and Repair in the Nervous System*. Boston,  
1719 MA: Springer US; 2007. p. 165-83.
- 1720 95. Keep R.F. AAV, Stamatovic S.M., Shakui P., Ennis S.R. Ischemia-induced endothelial  
1721 cell dysfunction. *Intracranial Pressure and Brain Monitoring XII*. 2005;95.
- 1722 96. Park H-H, Han M-H, Choi H, Lee YJ, Kim JM, Cheong JH, et al. Mitochondria damaged  
1723 by Oxygen Glucose Deprivation can be Restored through Activation of the PI3K/Akt Pathway  
1724 and Inhibition of Calcium Influx by Amlodipine Camsylate. *Scientific Reports*. 2019;9(1):15717.
- 1725 97. Liao L-X, Zhao M-B, Dong X, Jiang Y, Zeng K-W, Tu P-F. TDB protects vascular  
1726 endothelial cells against oxygen-glucose deprivation/reperfusion-induced injury by targeting  
1727 miR-34a to increase Bcl-2 expression. *Scientific Reports*. 2016;6(1):37959.
- 1728 98. Kong LY, Liang MY, Liu JP, Lai P, Ye JS, Zhang ZX, et al. Mesenchymal Stem Cell-  
1729 derived Exosomes Rescue Oxygen-Glucose Deprivation-induced Injury in Endothelial Cells.  
1730 *Curr Neurovasc Res*. 2020;17(2):155-63.
- 1731 99. Arslan F, Lai RC, Smeets MB, Akeroyd L, Choo A, Agnor ENE, et al. Mesenchymal  
1732 stem cell-derived exosomes increase ATP levels, decrease oxidative stress and activate PI3K/Akt  
1733 pathway to enhance myocardial viability and prevent adverse remodeling after myocardial  
1734 ischemia/reperfusion injury. *Stem Cell Research*. 2013;10(3):301-12.

- 1735 100. Pasquale D'Acunzo oP-G, Yohan Kim, Tal Hargash, Chelsea Miller, Melissa J. Alldred,  
1736 Hediye Erdjument-Bromage, Sai C. Penikalapati, Monika Pawlik, Mitsuo Saito, Mariko Saito,  
1737 Stephen D. Ginsberg, Thomas A. Neubert, Chris N. Goulbourne, Efrat Levy. Mitovesicles are a  
1738 novel population of extracellular vesicles of mitochondrial origin altered in Down syndrome.  
1739 *Scientific Reports*. 2021;7:eabe5085
- 1740 101. Yetkin-Arik B, Vogels IMC, Nowak-Sliwinska P, Weiss A, Houtkooper RH, Van  
1741 Noorden CJF, et al. The role of glycolysis and mitochondrial respiration in the formation and  
1742 functioning of endothelial tip cells during angiogenesis. *Scientific Reports*. 2019;9(1):12608.
- 1743 102. Smolina N, Bruton J, Kostareva A, Sejersen T. Assaying Mitochondrial Respiration as an  
1744 Indicator of Cellular Metabolism and Fitness. *Methods Mol Biol*. 2017;1601:79-87.
- 1745 103. Rose S, Frye RE, Slattery J, Wynne R, Tippett M, Pavliv O, et al. Oxidative stress  
1746 induces mitochondrial dysfunction in a subset of autism lymphoblastoid cell lines in a well-  
1747 matched case control cohort. *PLoS One*. 2014;9(1):e85436.
- 1748 104. Wang Z, Guan D, Wang S, Chai LYA, Xu S, Lam KP. Glycolysis and Oxidative  
1749 Phosphorylation Play Critical Roles in Natural Killer Cell Receptor-Mediated Natural Killer Cell  
1750 Functions. *Front Immunol*. 2020;11(202):202.
- 1751 105. GM C. The Mechanism of Oxidative Phosphorylation. *The Cell: A Molecular Approach*.  
1752 2. Sunderland (MA): Sinauer Associates; 2000.
- 1753 106. King MP, Attardi G. Injection of mitochondria into human cells leads to a rapid  
1754 replacement of the endogenous mitochondrial DNA. *Cell*. 1988;52(6):811-9.
- 1755 107. Kadry H, Noorani B, Cucullo L. A blood–brain barrier overview on structure, function,  
1756 impairment, and biomarkers of integrity. *Fluids and Barriers of the CNS*. 2020;17(1):69.
- 1757 108. Li D, Duncan RF. Transient acquired thermotolerance in *Drosophila*, correlated with  
1758 rapid degradation of Hsp70 during recovery. *Eur J Biochem*. 1995;231(2):454-65.
- 1759 109. Zimmermann M, Traxler D, Simader E, Bekos C, Dieplinger B, Lainscak M, et al. In  
1760 vitro Stability of Heat Shock Protein 27 in Serum and Plasma Under Different Pre-analytical  
1761 Conditions: Implications for Large-Scale Clinical Studies. *Ann Lab Med*. 2016;36(4):353-7.
- 1762 110. Miyata K, Oba M, Nakanishi M, Fukushima S, Yamasaki Y, Koyama H, et al. Polyplexes  
1763 from Poly(aspartamide) Bearing 1,2-Diaminoethane Side Chains Induce pH-Selective,  
1764 Endosomal Membrane Destabilization with Amplified Transfection and Negligible Cytotoxicity.  
1765 *Journal of the American Chemical Society*. 2008;130(48):16287-94.
- 1766 111. Haney MJ, Klyachko NL, Zhao Y, Gupta R, Plotnikova EG, He Z, et al. Exosomes as  
1767 drug delivery vehicles for Parkinson's disease therapy. *J Control Release*. 2015;207:18-30.
- 1768 112. Ramasubramanian L, Kumar P, Wang A. Engineering Extracellular Vesicles as  
1769 Nanotherapeutics for Regenerative Medicine. *Biomolecules*. 2019;10(1):48.
- 1770 113. Yuan D, Zhao Y, Banks WA, Bullock KM, Haney M, Batrakova E, et al. Macrophage  
1771 exosomes as natural nanocarriers for protein delivery to inflamed brain. *Biomaterials*.  
1772 2017;142:1-12.
- 1773 114. Zhang S, Hu Y, Huang Y, Xu H, Wu G, Dai H. Heat shock protein 27 promotes cell  
1774 proliferation through activator protein-1 in lung cancer. *Oncol Lett*. 2015;9(6):2572-6.
- 1775 115. Park A-M, Tsunoda I, Yoshie O. Heat shock protein 27 promotes cell cycle progression  
1776 by down-regulating E2F transcription factor 4 and retinoblastoma family protein p130. *J Biol*  
1777 *Chem*. 2018;293(41):15815-26.
- 1778 116. Stetler RA, Gao Y, Signore AP, Cao G, Chen J. HSP27: mechanisms of cellular  
1779 protection against neuronal injury. *Curr Mol Med*. 2009;9(7):863-72.

- 1780 117. Venugopal A, Sundaramoorthy K, Vellingiri B. Therapeutic potential of Hsp27 in  
1781 neurological diseases. *Egyptian Journal of Medical Human Genetics*. 2019;20(1):21.
- 1782 118. Reddy VS, Madala SK, Trinath J, Reddy GB. Extracellular small heat shock proteins:  
1783 exosomal biogenesis and function. *Cell Stress Chaperones*. 2018;23(3):441-54.
- 1784 119. Wyciszkievicz A, Kalinowska-Łyszczarz A, Nowakowski B, Kaźmierczak K,  
1785 Osztynowicz K, Michalak S. Expression of small heat shock proteins in exosomes from patients  
1786 with gynecologic cancers. *Scientific Reports*. 2019;9(1):9817.
- 1787 120. Chanteloup G, Cordonnier M, Isambert N, Bertaut A, Marcion G, Garrido C, et al.  
1788 Membrane-bound exosomal HSP70 as a biomarker for detection and monitoring of malignant  
1789 solid tumours: a pilot study. *Pilot and Feasibility Studies*. 2020;6(1):35.
- 1790 121. Takeuchi T, Suzuki M, Fujikake N, Popiel HA, Kikuchi H, Futaki S, et al. Intercellular  
1791 chaperone transmission via exosomes contributes to maintenance of protein homeostasis at the  
1792 organismal level. *Proceedings of the National Academy of Sciences*. 2015;112(19):E2497-E506.
- 1793
